# Supplementary material for: Total synthesis of the proposed structure of iriomoteolide-1a
Source: Royal Society of Chemistry journal article supplement (doi:10.1039/c0cc00628a), 2010-01-01

## Supporting Information

### Total Synthesis of Proposed Structure of Iriomoteolide-1a

Jun Xie, Yuelong Ma, David A. Horne\*

*Department of Molecular Medicine, Beckman Research Institute at City of Hope, Duarte, CA 91010*

#### Contents:

General information S1

Experimental procedure S2-S12

<sup>1</sup>H and <sup>13</sup>C NMR spectra S13-S54

Table S55

#### General Information:

All reagents and solvents were commercial grade and purified prior to use when necessary. TLC was performed on Silica Gel 60 F<sub>254</sub> from EMD. Visualization was performed by ultraviolet light and/or by staining with potassium permanganate. Flash Chromatography was performed using Silica Gel 60 (particle size 40-63μm). All <sup>1</sup>H & <sup>13</sup>C NMR spectra were recorded at 400 MHz and 100 MHz (Varian), respectively, at room temperature. Optical rotations were measured on JASCO p-2000 polarimeter. High-resolution mass spectrometry (HRMS) data was obtained from Thermo Electron LTQ-FT hybrid linear ion trap - Fourier transform ion cyclotron resonance mass spectrometer. IR spectra were recorded as thin films on Thermo Nicolet IR200 and are reported at 23 °C in wavenumbers (cm<sup>-1</sup>).

### Experimental procedure:

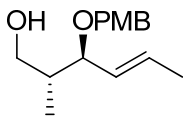

**(2R,3S,E)-3-(4-methoxybenzyloxy)-2-methylhex-4-en-1-ol (5).** To a stirred solution of diol **4** (159 mg, 1.22 mmol) in CH<sub>2</sub>Cl<sub>2</sub> (12 mL) was added PPTS (15 mg, 0.06 mmol, 0.05 equiv) and 4-methoxybenzaldehyde dimethyl acetal (267 mg, 1.47 mmol, 1.2 equiv). The reaction was stirred overnight and quenched with Et<sub>3</sub>N. The solvent was removed under reduced pressure and the resulting residue was purified by Flash chromatography (4.5% EtOAc/hexane) to afford acetal (**5**) (283 mg, 93%). [ $\alpha$ ]<sub>D</sub><sup>20</sup> = -44.5 (*c*=0.80, CHCl<sub>3</sub>); <sup>1</sup>H NMR (400 MHz, CDCl<sub>3</sub>)  $\delta$  (ppm): 7.42 (d, 2H, *J* = 8.7 Hz), 6.87 (d, 2H, *J* = 8.7 Hz), 5.80 (qd, 1H, *J* = 6.6 Hz, 15.3 Hz), 5.52 (m, 1H), 5.48 (s, 1H), 4.14 (dd, 1H, *J* = 4.6 Hz, 11.4 Hz), 3.82 (m, 1H), 3.79 (s, 3H), 3.51 (t, 1H, *J* = 11.2 Hz), 1.83-1.92 (m, 1H), 1.73 (dd, 3H, *J* = 1.5 Hz, 6.4 Hz), 0.75 (d, 3H, *J* = 6.8 Hz); <sup>13</sup>C NMR (100 MHz, CDCl<sub>3</sub>)  $\delta$  (ppm): 160.1, 131.4, 130.5, 129.7, 127.8, 113.8, 101.4, 84.9, 73.3, 55.5, 34.3, 18.1, 12.7; HRMS C<sub>15</sub>H<sub>20</sub>O<sub>3</sub> [M+Na]<sup>+</sup> calc'd 271.1305, found. 271.1304; IR  $\nu_{\text{max}}$  (film) 3074, 2977, 2835, 1641, 1516, 1378, 1249, 1170, 1033, 917, 825 cm<sup>-1</sup>.

To a stirred solution of acetal (**5**) (46 mg, 0.19 mmol) in CH<sub>2</sub>Cl<sub>2</sub> (2 mL) was added DIBAL-H (1.2 M in toluene, 0.47 mL, 0.56 mmol, 3 equiv) at -78 °C. After the addition, the reaction was warmed to 0 °C. After 30 min at 0 °C, the reaction was quenched with MeOH and stirred for 30 min at 23 °C. The solid was removed through filtration and the filtrate was concentrated under reduced pressure. The resulting residue was purified by Flash chromatography (10-12% EtOAc/hexane) to afford **6** (43 mg, 92%) as a colorless oil. [ $\alpha$ ]<sub>D</sub><sup>20</sup> = 72.0 (*c*=1.0, CHCl<sub>3</sub>); <sup>1</sup>H NMR (400 MHz, CDCl<sub>3</sub>)  $\delta$  (ppm): 7.23 (d, 2H, *J* = 8.6 Hz), 6.87 (d, 2H, *J* = 8.6 Hz), 5.65 (qd, 1H, *J* = 6.4 Hz, 15.3 Hz), 5.35 (ddd, 1H, *J* = 1.6 Hz, 8.6 Hz, 15.3 Hz), 4.53 (d, 1H, *J* = 11.4 Hz), 4.24 (d, 1H, *J* = 11.4 Hz), 3.80 (s, 3H), 3.52-3.64 (m, 3H), 3.15 (dd, 1H, *J* = 3.5 Hz, 8.2 Hz), 1.80-1.86 (m, 1H), 1.77 (dd, 3H, *J* = 1.6 Hz, 6.4 Hz), 0.77 (d, 3H, *J* = 7.0 Hz); <sup>13</sup>C NMR (100 MHz, CDCl<sub>3</sub>)  $\delta$  (ppm): 159.4, 130.9, 130.6, 130.5, 129.7, 114.1, 86.3, 69.7, 68.0, 55.5, 40.1, 18.0, 14.1; HRMS C<sub>15</sub>H<sub>22</sub>O<sub>3</sub> [M+Na]<sup>+</sup> calc'd 273.1461, found. 273.1459; IR  $\nu_{\text{max}}$  (film) 3439, 3074, 2977, 2835, 1614, 1512, 1378, 1249, 1033, 917, 825 cm<sup>-1</sup>.

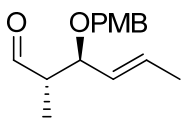

**(2S,3S,E)-3-(4-methoxybenzyloxy)-2-methylhex-4-enal (6).** To a stirred solution of **5** (40 mg, 0.16 mmol) in CH<sub>2</sub>Cl<sub>2</sub> (5 mL) was added NaHCO<sub>3</sub> (134 mg, 1.6 mmol, 10 equiv) and the Dess-Martin reagent (103 mg, 0.24 mmol, 1.5 equiv). After 1 h, the reaction was quenched with sat. Na<sub>2</sub>SO<sub>3</sub> and sat. NaHCO<sub>3</sub>, extracted with CH<sub>2</sub>Cl<sub>2</sub> (3 x 10 mL), dried over MgSO<sub>4</sub>, and concentrated under reduced pressure. The

resulting residue was purified by Flash chromatography (4% EtOAc/hexane) to afford **6** (114 mg, 86%) as a colorless oil.  $[\alpha]_D^{20}=80.7$  ( $c=1.0$ ,  $\text{CHCl}_3$ );  $^1\text{H}$  NMR (400 MHz,  $\text{CDCl}_3$ )  $\delta$  (ppm): 9.68 (d, 1H,  $J = 2.7$  Hz), 7.20 (d, 2H,  $J = 8.6$  Hz), 6.87 (d, 2H,  $J = 8.6$  Hz), 5.73 (qd, 1H,  $J = 6.4$  Hz, 15.3 Hz), 5.36 (ddd, 1H,  $J = 1.6$  Hz, 8.6 Hz, 15.3 Hz), 4.52 (d, 1H,  $J = 11.4$  Hz), 4.26 (d, 1H,  $J = 11.4$  Hz), 3.86 (t, 1H,  $J = 8.6$  Hz), 3.80 (s, 3H), 2.51-2.55 (m, 1H), 1.78 (d, 3H,  $J = 6.4$  Hz), 0.97 (d, 3H,  $J = 7.0$  Hz);  $^{13}\text{C}$  NMR (100 MHz,  $\text{CDCl}_3$ )  $\delta$  (ppm): 204.7, 159.4, 131.8, 130.5, 129.6, 129.1, 114.0, 80.8, 69.7, 55.5, 51.0, 18.0, 11.0; HRMS  $\text{C}_{15}\text{H}_{20}\text{O}_3$   $[\text{M}+\text{Na}]^+$  calc'd 271.1305, found. 271.1308; IR  $\nu_{\text{max}}$  (film) 2923, 2856, 1726, 1605, 1512, 1454, 1249, 1036, 969, 822  $\text{cm}^{-1}$ .

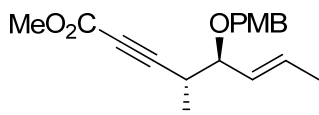

**(4R,5S,E)-methyl 5-(4-methoxybenzyloxy)-4-methyloct-6-en-2-ynoate (7).** To a stirred solution of  $\text{CBr}_4$  (93 mg, 0.28 mmol, 2 equiv) in  $\text{CH}_2\text{Cl}_2$  (0.3 mL) was added  $\text{Ph}_3\text{P}$  (147 mg, 0.56 mmol, 4 equiv) in  $\text{CH}_2\text{Cl}_2$  (0.3 mL) solution at 0  $^\circ\text{C}$ . The mixture was stirred 10 min at rt. and recooled to 0  $^\circ\text{C}$ . Aldehyde **6** (35 mg, 0.14 mmol) in  $\text{CH}_2\text{Cl}_2$  (0.3 mL) was added. After 2h, the reaction was quenched with sat.  $\text{NaHCO}_3$  and extracted with  $\text{CH}_2\text{Cl}_2$  (3 x 10 mL), dried over  $\text{MgSO}_4$ , and concentrated under reduced pressure. The resulting residue was purified by Flash chromatography (1-2% EtOAc/hexane) to afford dibromoalkene (50 mg, 88%) as a colorless oil.  $[\alpha]_D^{20}=5.6$  ( $c=1.0$ ,  $\text{CHCl}_3$ );  $^1\text{H}$  NMR (400 MHz,  $\text{CDCl}_3$ )  $\delta$  (ppm): 7.23 (d, 2H,  $J = 8.6$  Hz), 6.87 (d, 2H,  $J = 8.6$  Hz), 6.30 (d, 1H,  $J = 9.4$  Hz), 5.64 (qd, 1H,  $J = 6.4$  Hz, 15.3 Hz), 5.33 (ddd, 1H,  $J = 1.4$  Hz, 8.4 Hz, 15.3 Hz), 4.52 (d, 1H,  $J = 11.6$  Hz), 4.22 (d, 1H,  $J = 11.6$  Hz), 3.81 (s, 3H), 3.53 (dd, 1H,  $J = 5.7$  Hz, 8.4 Hz), 2.58-2.63 (m, 1H), 1.76 (dd, 3H,  $J = 1.4$  Hz, 6.4 Hz), 0.98 (d, 3H,  $J = 7.0$  Hz);  $^{13}\text{C}$  NMR (100 MHz,  $\text{CDCl}_3$ )  $\delta$  (ppm): 159.2, 141.4, 131.0, 130.7, 129.7, 129.5, 113.9, 88.5, 82.0, 69.5, 55.5, 43.5, 18.1, 15.5; HRMS  $\text{C}_{16}\text{H}_{20}\text{Br}_2\text{O}_2$   $[\text{M}+\text{Na}]^+$  calc'd 424.9722, found. 424.9722; IR  $\nu_{\text{max}}$  (film) 2923, 2856, 1587, 1512, 1454, 1249, 1036, 980, 822  $\text{cm}^{-1}$ .

To a stirred solution of dibromoalkene (48 mg, 0.12 mmol) in THF (1 mL) was added  $n\text{-BuLi}$  (2.4 M in Hexane, 0.11 mL, 0.26 mmol, 2.2 equiv) at -78  $^\circ\text{C}$ . After 30 min, the reaction was treated with methyl chloroformate (22 mg, 0.24 mmol, 2 equiv) and warmed to rt over 2.5 h. The reaction was quenched with sat.  $\text{NH}_4\text{Cl}$  and extracted with  $\text{Et}_2\text{O}$  (3 x 10 mL), dried over  $\text{MgSO}_4$ , and concentrated under reduced pressure. The resulting residue was purified by Flash chromatography (3-5% EtOAc/hexane) to afford **7** (33 mg, 91%) as a colorless oil.  $[\alpha]_D^{20}=38.7$  ( $c=1.0$ ,  $\text{CHCl}_3$ );  $^1\text{H}$  NMR (400 MHz,  $\text{CDCl}_3$ )  $\delta$  (ppm): 7.27 (d, 2H,  $J = 8.6$  Hz), 6.86 (d, 2H,  $J = 8.6$  Hz), 5.70 (qd, 1H,  $J = 6.4$  Hz, 15.3 Hz), 5.38 (ddd, 1H,  $J = 1.6$  Hz, 8.4 Hz, 15.3 Hz), 4.56 (d, 1H,  $J = 11.6$  Hz), 4.31 (d, 1H,  $J = 11.6$  Hz), 3.80 (s, 3H), 3.77 (s, 3H), 3.66 (dd, 1H,  $J = 6.6$  Hz, 8.2 Hz), 2.70-2.77 (m, 1H), 1.77 (dd, 3H,  $J = 1.6$  Hz, 6.4 Hz), 1.16 (d, 3H,  $J = 7.0$  Hz);  $^{13}\text{C}$  NMR (100 MHz,  $\text{CDCl}_3$ )  $\delta$  (ppm): 159.3, 154.5, 131.7, 130.6, 129.6, 128.7, 113.9, 91.7, 81.2, 73.9, 69.8,

55.5, 52.8, 32.0, 18.1, 16.0; HRMS  $C_{18}H_{22}O_4$   $[M+Na]^+$  calc'd 325.1410, found. 325.1408; IR  $\nu_{max}$  (film) 2940, 2840, 2238, 1717, 1610, 1512, 1436, 1254, 1169, 1036, 970, 828  $cm^{-1}$ .

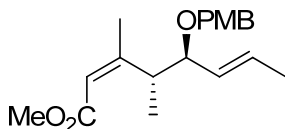

**(2Z,4R,5S,6E)-methyl 5-(4-methoxybenzyloxy)-3,4-dimethylocta-2,6-dienoate (8).** To a stirred suspension of CuI (57 mg, 0.3 mmol, 3 equiv) in THF (1 mL) was added MeLi (2.2 M in Hexane, 0.27 mL, 0.6 mmol, 6 equiv) at 0 °C. After 15 min, the reaction was cooled to -50 °C and treated with **7** (32 mg, 0.1 mmol) in THF (1 mL) solution. After 1.5 h, the reaction was quenched with AcOH (33  $\mu$ L) and sat.  $NH_4Cl$ , extracted with  $Et_2O$  (3 x 10 mL), dried over  $MgSO_4$ , and concentrated under reduced pressure. The resulting residue was purified by Flash chromatography (3% EtOAc/hexane) to afford **8** (30 mg, 90%).  $[\alpha]_D^{20} = -25.2$  ( $c=0.5$ ,  $CHCl_3$ );  $^1H$  NMR (400 MHz,  $CDCl_3$ )  $\delta$  (ppm): 7.19 (d, 2H,  $J = 8.6$  Hz), 6.84 (d, 2H,  $J = 8.6$  Hz), 5.67 (s, 1H), 5.64-5.69 (m, 1H), 5.33 (ddd, 1H,  $J = 1.6$  Hz, 8.6 Hz, 15.3 Hz), 4.48 (d, 1H,  $J = 11.6$  Hz), 4.21 (d, 1H,  $J = 11.6$  Hz), 4.02-4.06 (m, 1H), 3.79 (s, 3H), 3.65 (s, 3H), 3.59 (t, 1H,  $J = 9.0$  Hz), 1.77 (dd, 3H,  $J = 1.6$  Hz, 6.4 Hz), 1.72 (d, 3H,  $J = 1.2$  Hz), 0.93 (d, 3H,  $J = 7.0$  Hz);  $^{13}C$  NMR (100 MHz,  $CDCl_3$ )  $\delta$  (ppm): 166.9, 163.1, 159.1, 131.1, 130.9, 130.8, 129.6, 117.1, 113.8, 82.0, 69.2, 55.5, 51.0, 39.3, 20.3, 18.0, 15.8; HRMS  $C_{19}H_{26}O_4$   $[M+Na]^+$  calc'd 341.1723, found. 341.1719; IR  $\nu_{max}$  (film) 2949, 2856, 1717, 1641, 1512, 1454, 1245, 1036, 970, 822  $cm^{-1}$ .

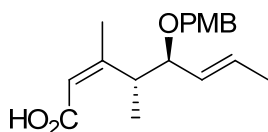

**(2Z,4R,5S,6E)-5-(4-methoxybenzyloxy)-3,4-dimethylocta-2,6-dienoic acid (3).** To a stirred solution of **8** (64 mg, 0.2 mmol) in MeOH (1 mL) and THF (1 mL) was added LiOH (1 M, 2 mL, 2 mmol, 10 equiv), after 60 h at rt, the pH value was adjusted to 2-3 with 1 M HCl and the mixture was extracted with  $Et_2O$ , dried over  $MgSO_4$ , and concentrated under reduced pressure. The resulting residue was purified by Flash chromatography (25% EtOAc/hexane) to afford acid **3** (58 mg, 95%).  $[\alpha]_D^{20} = -5.2$  ( $c=0.38$ ,  $CHCl_3$ );  $^1H$  NMR (400 MHz,  $CDCl_3$ )  $\delta$  (ppm): 7.16 (d, 2H,  $J = 8.6$  Hz), 6.86 (d, 2H,  $J = 8.6$  Hz), 5.79 (s, 1H), 5.70 (qd, 1H,  $J = 6.4$  Hz, 15.3 Hz), 5.32 (ddd, 1H,  $J = 1.6$  Hz, 8.6 Hz, 15.3 Hz), 4.58 (d, 1H,  $J = 11.6$  Hz), 4.26 (d, 1H,  $J = 11.6$  Hz), 3.80 (s, 3H), 3.54 (t, 1H,  $J = 9.6$  Hz), 3.32-3.42 (m, 1H), 1.80 (dd, 3H,  $J = 1.5$  Hz, 6.4 Hz), 1.64 (d, 3H,  $J = 1.6$  Hz), 0.89 (d, 3H,  $J = 6.8$  Hz);  $^{13}C$  NMR (100 MHz,  $CDCl_3$ )  $\delta$  (ppm): 169.4, 159.5, 157.9, 132.2, 129.9, 129.7, 129.6, 119.7, 114.0, 81.4, 69.5, 55.5, 40.8, 19.3, 18.1, 15.4; HRMS  $C_{18}H_{24}O_4$   $[M+Na]^+$  calc'd 327.1567, found. 327.1565; IR  $\nu_{max}$  (film) 2940, 2870, 1686, 1632, 1512, 1454, 1249, 1036, 970, 822  $cm^{-1}$ .

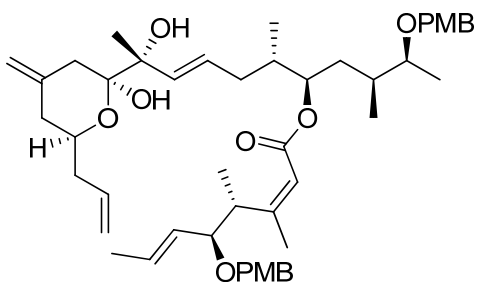

**Synthesis of (9).** To a stirred solution of Acid **3** (18 mg, 0.06 mmol, 1.5 equiv) in THF (0.8 mL) was added Et<sub>3</sub>N (16 mg, 0.16 mmol, 4 equiv) and 2,4,6-trichlorobenzoylchloride (24 mg, 0.1 mmol, 2.5 equiv) at rt. After 4 h at rt, the solid was removed and the filtrate was transferred to a solution of **2** (20 mg, 0.04 mmol) and DMAP (8 mg, 0.064 mmol, 1.6 equiv) in toluene (3 mL). After 18 h at rt, the mixture was quenched with sat. NaHCO<sub>3</sub> and diluted with Et<sub>2</sub>O, the organic layer was washed with H<sub>2</sub>O, brine, dried over MgSO<sub>4</sub> and concentrated under reduced pressure. The resulting residue was purified by Flash chromatography (14.5-15% EtOAc/hexane) to afford **9** (16 mg, 53%).  $[\alpha]_D^{20} = -4.2$  ( $c=1.3$ , CHCl<sub>3</sub>); <sup>1</sup>H NMR (400 MHz, CDCl<sub>3</sub>)  $\delta$  (ppm): 7.25 (d, 2H,  $J = 8.4$  Hz), 7.19 (d, 2H,  $J = 8.4$  Hz), 7.86 (t, 4H,  $J = 9.0$  Hz), 5.61-5.82 (m, 5H), 5.32 (dd, 1H,  $J = 8.4$  Hz, 15.3 Hz), 5.03-5.09 (m, 2H), 4.89-4.93 (m, 1H), 4.85 (s, 1H), 4.81 (s, 1H), 4.48 (d, 1H,  $J = 11.6$  Hz), 4.47 (d, 1H,  $J = 11.6$  Hz), 4.34 (d, 1H,  $J = 11.6$  Hz), 4.19 (d, 1H,  $J = 11.6$  Hz), 4.02-4.08 (m, 1H), 3.86-3.94 (m, 1H), 3.79 (s, 6H), 3.59 (t, 1H,  $J = 8.8$  Hz), 3.47-3.54 (m, 1H), 3.13 (s, 1H), 2.42 (s, 1H), 2.17-2.31 (m, 6H), 1.79-1.91 (m, 4H), 1.76 (d, 3H,  $J = 6.4$  Hz), 1.73 (s, 3H), 1.30-1.42 (m, 2H), 1.27 (s, 3H), 1.09 (d, 3H,  $J = 6.2$  Hz), 0.93 (d, 3H,  $J = 7.0$  Hz), 0.90 (d, 3H,  $J = 6.8$  Hz), 0.84 (d, 3H,  $J = 6.6$  Hz); <sup>13</sup>C NMR (100 MHz, CDCl<sub>3</sub>)  $\delta$  (ppm): 166.3, 162.4, 159.2, 159.0, 141.9, 134.7, 134.1, 131.5, 131.2, 130.9, 130.7, 129.4, 129.3, 129.1, 117.9, 117.3, 114.0, 113.8, 111.3, 99.4, 82.1, 77.4, 76.6, 75.3, 70.7, 70.5, 69.1, 55.5, 40.4, 39.6, 39.3, 38.0, 37.1, 35.3, 35.1, 33.6, 21.4, 20.4, 18.0, 16.6, 15.9, 15.8, 15.4; HRMS C<sub>48</sub>H<sub>68</sub>O<sub>9</sub> [M+Na]<sup>+</sup> calc'd 811.4756, found. 811.8744; IR  $\nu_{\max}$  (film) 3506, 3074, 2967, 2932, 1708, 1641, 1614, 1512, 1454, 1378, 1245, 1160, 1040, 974, 822 cm<sup>-1</sup>.

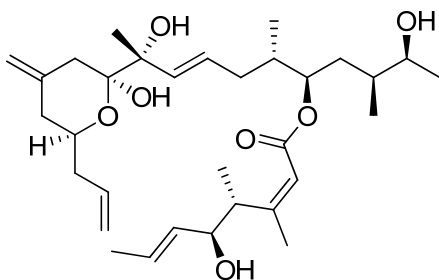

**Synthesis of (10).** To a stirred solution of **9** (26 mg, 0.033 mmol) in CH<sub>2</sub>Cl<sub>2</sub> (1 mL) + pH=7 buffer (0.5 mL) was added DDQ (30 mg, 0.13 mmol, 4 equiv) at rt. After 30 min, the reaction was quenched with sat. NaHCO<sub>3</sub> solution and extracted with CH<sub>2</sub>Cl<sub>2</sub> (3 x 10 mL). The combined organic layer was dried over MgSO<sub>4</sub>, and concentrated under reduced pressure. The resulting residue was purified by Flash

chromatography (30-33% EtOAc/hexane) to afford **10** (13.5 mg, 75%) as a colorless oil.  $[\alpha]_D^{20} = -38.3$  ( $c=0.85$ ,  $\text{CHCl}_3$ );  $^1\text{H}$  NMR (400 MHz,  $\text{CDCl}_3$ )  $\delta$  (ppm): 5.64-5.80 (m, 5H), 5.32 (dd, 1H,  $J = 7.6$  Hz, 15.3 Hz), 5.03-5.11 (m, 2H), 4.97-5.01 (m, 1H), 4.85 (s, 1H), 4.82 (s, 1H), 3.88-3.93 (m, 1H), 3.78-3.84 (m, 2H), 3.68-3.74 (m, 1H), 3.19 (s, 1H), 2.69 (b, 1H), 2.60 (s, 1H), 2.17-2.34 (m, 6H), 1.74-1.99 (m, 4H), 1.88 (s, 3H), 1.71 (d, 3H,  $J = 6.4$  Hz), 1.33-1.61 (m, 2H), 1.29 (s, 3H), 1.12 (d, 3H,  $J = 6.2$  Hz), 0.93 (d, 3H,  $J = 6.8$  Hz), 0.90 (d, 3H,  $J = 6.8$  Hz), 0.87 (d, 3H,  $J = 7.0$  Hz);  $^{13}\text{C}$  NMR (100 MHz,  $\text{CDCl}_3$ )  $\delta$  (ppm): 167.6, 161.6, 141.9, 134.8, 134.4, 133.2, 128.7, 128.6, 119.0, 117.3, 111.4, 99.4, 77.3, 75.9, 75.8, 70.7, 69.8, 41.4, 40.4, 39.5, 38.0, 36.9, 36.2, 35.5, 33.5, 21.5, 20.3, 20.1, 18.0, 15.8, 15.5, 15.1; HRMS  $\text{C}_{32}\text{H}_{52}\text{O}_7$   $[\text{M}+\text{Na}]^+$  calc'd 571.3605, found. 571.3597; IR  $\nu_{\text{max}}$  (film) 3439, 2967, 2923, 1694, 1637, 1450, 1374, 1245, 1160, 1009, 969  $\text{cm}^{-1}$ .

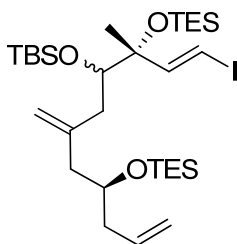

**Synthesis of (12).** To a stirred solution of **11** (304 mg, 0.52 mmol) in  $\text{CH}_2\text{Cl}_2$  (2.6 mL) was added 2,6-lutidine (139 mg, 1.3 mmol, 2.5 equiv) and TBSOTf (206 mg, 0.78 mmol, 1.5 equiv) at 0 °C and stirred 1.5 h at 23 °C. The mixture was quenched with sat.  $\text{NaHCO}_3$ , the aqueous layer was extracted with  $\text{CH}_2\text{Cl}_2$  (3 x 30 mL) and the combined organic layer was dried over  $\text{MgSO}_4$  and concentrated under reduced pressure. The resulting residue was purified by Flash chromatography (0.4% EtOAc/hexane) to afford **12** (319 mg, 88%).  $^1\text{H}$  NMR (400 MHz,  $\text{CDCl}_3$ ) (data for major diastereomer)  $\delta$  (ppm): 6.59 (d, 1H,  $J = 14.6$  Hz), 6.19 (d, 1H,  $J = 14.6$  Hz), 5.77-5.88 (m, 1H), 5.03-5.06 (m, 2H), 4.84 (s, 1H), 4.83 (s, 1H), 3.77-3.82 (m, 1H), 3.49-3.57 (m, 1H), 2.42 (d, 1H,  $J = 14.4$  Hz), 2.11-2.27 (m, 4H), 1.84 (dd, 1H,  $J = 8.4, 14.4$  Hz), 1.31 (s, 3H), 0.84-0.97 (m, 27H), 0.55-0.63 (m, 12H), 0.03 (s, 3H), -0.04 (s, 3H);  $^{13}\text{C}$  NMR (100 MHz,  $\text{CDCl}_3$ ) (data for major diastereomer)  $\delta$  (ppm): 150.0, 143.5, 135.5, 117.2, 115.4, 81.3, 78.4, 75.9, 70.8, 44.9, 42.2, 40.3, 26.4, 25.0, 18.4, 7.4, 7.2, 7.0, 5.3, -3.1, -3.8; HRMS  $\text{C}_{31}\text{H}_{63}\text{IO}_3\text{Si}_3$   $[\text{M}+\text{Na}]^+$  calc'd 717.3022, found. 717.3045; IR  $\nu_{\text{max}}$  (film) 3074, 2954, 2875, 1641, 1605, 1413, 1254, 1192, 1098, 1000, 836, 741  $\text{cm}^{-1}$ .

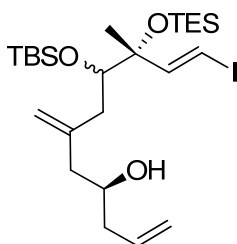

**Synthesis of (13).** To a stirred solution of **12** (319 mg, 0.46 mmol) in THF (4.6 mL) was added 1.4 mL of a HF·Py solution consisting of 1.7 mL 70% HF·Py : 4 mL THF : 1.7 mL pyridine. After 30 min, the reaction was quenched with sat. NaHCO<sub>3</sub> and extracted with Et<sub>2</sub>O. The combined organic layer was washed with H<sub>2</sub>O and brine, dried over MgSO<sub>4</sub> and concentrated under reduced pressure. The resulting residue was purified by Flash chromatography (1.5% EtOAc/hexane) to afford **13** (234 mg, 88%). <sup>1</sup>H NMR (400 MHz, CDCl<sub>3</sub>) (data for major diastereomer) δ (ppm): 6.59 (d, 1H, *J* = 14.6 Hz), 6.19 (d, 1H, *J* = 14.6 Hz), 5.77-5.89 (m, 1H), 5.11-5.16 (m, 2H), 4.96 (s, 1H), 4.91 (s, 1H), 3.68-3.73 (m, 1H), 3.47-3.50 (m, 1H), 2.50 (d, 1H, *J* = 14.4 Hz), 2.17-2.27 (m, 3H), 2.01-2.07 (m, 1H), 1.89 (dd, 1H, *J* = 8.8, 14.4 Hz), 1.84 (d, 1H, *J* = 2.2 Hz), 1.33 (s, 3H), 0.85-0.97 (m, 18H), 0.59 (q, 6H, *J* = 8.0 Hz), 0.04 (s, 3H), -0.02 (s, 3H); <sup>13</sup>C NMR (100 MHz, CDCl<sub>3</sub>) (data for major diastereomer) δ (ppm): 149.7, 143.5, 135.0, 118.0, 116.9, 81.2, 77.7, 75.9, 67.8, 43.7, 41.8, 39.8, 26.3, 25.4, 18.4, 7.4, 7.0, -2.9, -3.7; HRMS C<sub>25</sub>H<sub>49</sub>IO<sub>3</sub>Si<sub>2</sub> [M+Na]<sup>+</sup> calc'd 603.2157, found. 603.2168; IR ν<sub>max</sub> (film) 3457, 3074, 2954, 2878, 1641, 1601, 1463, 1254, 1192, 1098, 1000, 836, 738 cm<sup>-1</sup>.

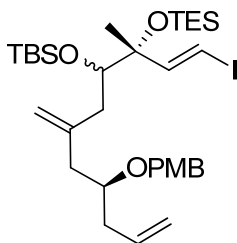

**Synthesis of (14).** To a stirred solution of **13** (234 mg, 0.4 mmol) and PMBO(C=NH)CCl<sub>3</sub> (226 mg, 0.8 mmol, 2 equiv) in Toluene (4 mL) was added Sc(OTf)<sub>3</sub> (16 mg, 0.032 mmol, 0.08 equiv). After 3 h, the solvent was removed. The resulting residue was purified by Flash chromatography (1% EtOAc/hexane) to afford **14** (206 mg, 73%). (Containing impurity) <sup>1</sup>H NMR (400 MHz, CDCl<sub>3</sub>) (data for major diastereomer) δ (ppm): 7.25 (d, 2H, *J* = 8.6 Hz), 6.86 (d, 2H, *J* = 8.6 Hz), 6.59 (d, 1H, *J* = 14.4 Hz), 6.18 (d, 1H, *J* = 14.4 Hz), 5.81-5.91 (m, 1H), 5.06-5.11 (m, 2H), 4.88 (s, 2H), 4.43-4.50 (m, 2H), 3.80 (s, 1H), 3.50-3.56 (m, 2H), 2.45 (d, 1H, *J* = 14.4 Hz), 2.27-2.38 (m, 3H), 2.12 (dd, 1H, *J* = 5.6, 14.4 Hz), 1.87 (dd, 1H, *J* = 8.4, 14.4 Hz), 1.31 (s, 3H), 0.85-0.97 (m, 18H), 0.59 (q, 6H, *J* = 8.0 Hz), 0.03 (s, 3H), -0.02 (s, 3H); <sup>13</sup>C NMR (100 MHz, CDCl<sub>3</sub>) (data for major diastereomer) δ (ppm): 159.3, 150.0, 143.5, 135.3, 133.9, 129.5, 117.3, 115.3, 114.1, 81.3, 78.1, 77.9, 76.0, 71.2, 55.5, 41.8, 40.3, 39.0, 26.4, 25.0, 18.4, 7.4, 7.0, -3.1, -3.8; HRMS C<sub>33</sub>H<sub>57</sub>IO<sub>4</sub>Si<sub>2</sub> [M+Na]<sup>+</sup> calc'd 723.2732, found. 723.2746; IR ν<sub>max</sub> (film) 3070, 2954, 2878, 1641, 1601, 1463, 1249, 1192, 1098, 1005, 836, 738 cm<sup>-1</sup>.

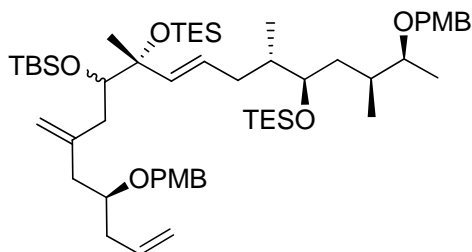

**Synthesis of (16).** To a stirred solution of alkyl iodide **15** (41 mg, 0.078 mmol, 1.1 equiv) in Et<sub>2</sub>O (0.8 mL) was added 9-MeO-9-BBN (1 M in hexane, 0.2 mL, 0.2 mmol, 2.8 equiv). The mixture was cooled to -78 °C and treated with *t*-BuLi (1.6 M in pentane, 0.1 mL, 0.16 mmol, 2.3 equiv). After 5 min, THF (0.8 mL) was added dropwise. The reaction was warmed to 23 °C and stirred for 1 h. In another flask, (dppf)PdCl<sub>2</sub> (2.9 mg, 0.0036 mmol, 0.05 equiv), AsPh<sub>3</sub> (3.1 mg, 0.01 mmol, 0.15 equiv), CsCO<sub>3</sub> (92 mg, 0.28 mmol, 4 equiv), H<sub>2</sub>O (31 mg, 1.7 mmol, 24 equiv) was added to a solution of **14** (50 mg, 0.071 mmol) in DMF (1.3 mL), the alkyl boronate solution was transferred to the DMF solution. The reaction was stirred overnight and quenched with pH=7 buffer and 30% H<sub>2</sub>O<sub>2</sub>. After 30 min, the mixture was diluted with Et<sub>2</sub>O. The organic layer was washed with H<sub>2</sub>O, brine, and dried over MgSO<sub>4</sub>. After concentration under reduced pressure, the resulting residue was purified by Flash chromatography (1-1.8% EtOAc/hexane) to afford **16** (57 mg, 84%) as a colorless oil. <sup>1</sup>H NMR (400 MHz, CDCl<sub>3</sub>) (data for major diastereomer) δ (ppm): 7.23-7.25 (m, 4H), 6.83-6.86 (m, 4H), 5.81-5.91 (m, 1H), 5.44-5.56 (m, 2H), 5.05-5.10 (m, 2H), 4.85 (s, 2H), 4.50 (d, 1H *J* = 11.6 Hz), 4.44 (s, 2H), 4.35 (d, 1H, *J* = 11.6 Hz), 3.78 (s, 6H), 3.62-3.67 (m, 1H), 3.51-3.60 (m, 2H), 3.35-3.42 (m, 1H), 2.52 (d, 1H, *J* = 14.4 Hz), 2.21-2.37 (m, 3H), 2.11-2.19 (m, 2H), 1.86 (dd, 1H, *J* = 8.6, 14.4 Hz), 1.76-1.83 (m, 1H), 1.58-1.65 (m, 3H), 1.30 (s, 3H), 1.18-1.25 (m, 1H), 1.13 (d, 3H, *J* = 6.2 Hz), 0.82-0.97 (m, 33H), 0.54-0.61 (m, 12H), 0.03 (s, 3H), -0.03 (s, 3H); <sup>13</sup>C NMR (100 MHz, CDCl<sub>3</sub>) (data for major diastereomer) δ (ppm): 159.3, 159.2, 144.1, 135.4, 134.8, 131.5, 131.2, 129.4, 129.3, 128.9, 117.1, 114.9, 113.9, 78.7, 78.1, 77.3, 77.1, 74.9, 71.2, 70.5, 55.48, 55.46, 41.5, 40.6, 39.1, 38.9, 36.2, 35.4, 34.9, 26.4, 25.6, 18.5, 16.7, 15.9, 15.5, 7.5, 7.3, 7.1, 5.5, -3.1, -3.7; HRMS C<sub>56</sub>H<sub>98</sub>O<sub>7</sub>Si<sub>3</sub> [M+Na]<sup>+</sup> calc'd 989.6513, found. 989.6536; IR ν<sub>max</sub> (film): 2963, 2932, 2878, 1614, 1512, 1463, 1249, 1098, 1005, 836, 742 cm<sup>-1</sup>.

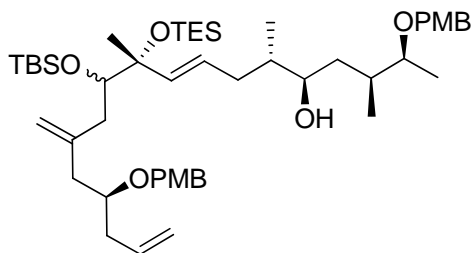

**Synthesis of (17).** To a stirred solution of **16** (202 mg, 0.21 mmol) in THF (3 mL) was added 1 mL of a HF·Py solution consisting of 1.7 mL 70% HF·Py : 4 mL THF : 1.7 mL pyridine. After 45 min, the reaction



was quenched with sat.  $\text{NaHCO}_3$  and extracted with  $\text{Et}_2\text{O}$ . The combined organic layer was washed with  $\text{H}_2\text{O}$  and brine, dried over  $\text{MgSO}_4$  and concentrated under reduced pressure. The resulting residue was purified by Flash chromatography (8-10%  $\text{EtOAc}$ /hexane) to afford **17** (154 mg, 86%).  $^1\text{H}$  NMR (400 MHz,  $\text{CDCl}_3$ ) (data for major diastereomer)  $\delta$  (ppm): 7.23-7.25 (m, 4H), 6.83-6.86 (m, 4H), 5.81-5.91 (m, 1H), 5.46-5.57 (m, 2H), 5.04-5.10 (m, 2H), 4.85 (s, 2H), 4.54 (d, 1H,  $J = 11.6$  Hz), 4.45 (s, 2H), 4.36 (d, 1H,  $J = 11.6$  Hz), 3.79 (s, 6H), 3.47-3.60 (m, 4H), 2.66 (d, 1H,  $J = 4.8$  Hz), 2.52 (d, 1H,  $J = 14.6$  Hz), 2.28-2.37 (m, 4H), 2.11-2.16 (dd, 1H,  $J = 5.4, 14.2$  Hz), 1.95-2.05 (m, 1H), 1.80-1.90 (m, 2H), 1.56-1.67 (m, 2H), 1.30 (s, 3H), 1.18-1.25 (m, 1H), 1.13 (d, 3H,  $J = 6.2$  Hz), 0.82-0.95 (m, 24H), 0.56 (q, 6H,  $J = 7.8$  Hz), 0.03 (s, 3H), -0.03 (s, 3H);  $^{13}\text{C}$  NMR (100 MHz,  $\text{CDCl}_3$ ) (data for major diastereomer)  $\delta$  (ppm): 159.3, 159.2, 144.1, 135.4, 135.1, 131.2, 130.9, 129.5, 129.3, 128.5, 117.2, 114.9, 114.0, 113.9, 78.7, 78.2, 78.1, 77.0, 73.2, 71.2, 70.5, 55.49, 55.46, 41.5, 40.6, 39.5, 39.0, 36.8, 35.8, 34.5, 26.4, 25.6, 18.5, 17.6, 15.8, 14.7, 7.5, 7.1, -3.1, -3.7; HRMS  $\text{C}_{50}\text{H}_{84}\text{O}_7\text{Si}_2$   $[\text{M}+\text{Na}]^+$  calc'd 875.5648, found. 875.5663; IR  $\nu_{\text{max}}$  (film): 3460, 2963, 2932, 2878, 1614, 1512, 1463, 1249, 1098, 1005, 836, 742  $\text{cm}^{-1}$ .

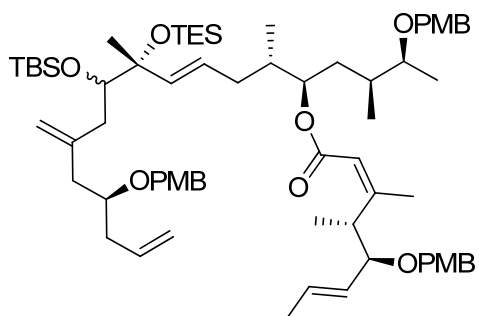

**Synthesis of (18).** To a stirred solution of Acid **3** (82 mg, 0.27 mmol, 1.5 equiv) in THF (2 mL) was added  $\text{Et}_3\text{N}$  (73 mg, 0.72 mmol, 4 equiv) and 2, 4, 6-trichlorobenzoylchloride (110 mg, 0.45 mmol, 2.5 equiv) at rt. After 4 h at rt, the solid was removed and the filtrate was transferred to a solution of **17** (154 mg, 0.18 mmol) and DMAP (35 mg, 0.29 mmol, 1.6 equiv) in Toluene (6 mL). After 12 h at rt, the mixture was quenched with sat.  $\text{NaHCO}_3$  and diluted with  $\text{Et}_2\text{O}$ , the organic layer was washed with  $\text{H}_2\text{O}$ , brine, dried over  $\text{MgSO}_4$  and concentrated under reduced pressure. The resulting residue was purified by Flash chromatography (4-4.5%  $\text{EtOAc}$ /hexane) to afford **18** (191 mg, 93%).  $^1\text{H}$  NMR (400 MHz,  $\text{CDCl}_3$ ) (data for major diastereomer)  $\delta$  (ppm): 7.15-7.25 (m, 6H), 6.82-6.85 (m, 6H), 5.80-5.90 (m, 1H), 5.60-5.66 (m, 2H), 5.43-5.53 (m, 2H), 5.32 (dd, 1H,  $J = 8.4, 15.4$  Hz), 5.04-5.09 (m, 2H), 4.92-4.97 (m, 1H), 4.85 (s, 2H), 4.44-4.48 (m, 4H), 4.35 (d, 1H,  $J = 11.6$  Hz), 4.20 (d, 1H,  $J = 11.6$  Hz), 4.03-4.10 (m, 1H), 3.78 (s, 9H), 3.45-3.61 (m, 4H), 2.51 (d, 1H,  $J = 14.2$  Hz), 2.17-2.34 (m, 4H), 2.12 (dd, 1H,  $J = 5.4, 14.2$  Hz), 1.85 (dd, 1H,  $J = 8.6, 14.6$  Hz), 1.72-1.77 (m, 3H), 1.74 (d, 3H,  $J = 6.4$  Hz), 1.72 (s, 3H), 1.58-1.63 (m, 1H), 1.33-1.40 (m, 1H), 1.30 (s, 3H), 1.09 (d, 3H,  $J = 6.2$  Hz), 0.81-0.95 (m, 27H), 0.57 (q, 6H,  $J = 7.8$  Hz), 0.02 (s, 3H), -0.04 (s, 3H);  $^{13}\text{C}$  NMR (100 MHz,  $\text{CDCl}_3$ ) (data for major diastereomer)  $\delta$  (ppm): 166.3, 162.3, 159.3, 159.2, 159.1, 144.1, 135.4, 135.3, 131.6, 131.22, 131.18, 130.9, 130.6, 129.5, 129.4, 129.3, 128.1,

117.9, 117.2, 114.9, 113.9, 113.7, 82.0, 78.6, 78.1, 77.0, 76.7, 75.7, 71.2, 70.5, 69.2, 55.49, 55.45, 41.5, 40.6, 39.3, 39.1, 37.3, 35.3, 35.2, 33.6, 26.4, 25.8, 20.5, 18.5, 18.0, 16.6, 16.0, 15.8, 15.5, 7.5, 7.1, -3.0, -3.7; HRMS  $C_{68}H_{106}O_{10}Si_2$   $[M+Na]^+$  calc'd 1161.7217, found. 1161.7261; IR  $\nu_{max}$  (film) 2958, 2932, 2874, 1708, 1641, 1614, 1512, 1459, 1249, 1089, 1036, 831, 742  $cm^{-1}$ .

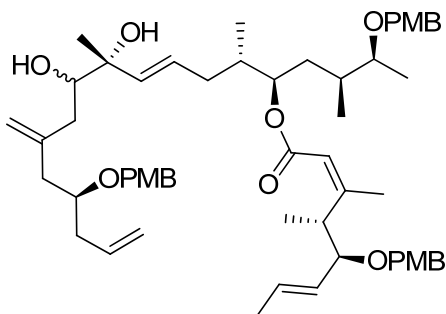

**Synthesis of (19).** To a stirred solution of **18** (191 mg, 0.17 mmol) in THF (1.2 mL) was added TBAF (1 M in THF, 0.5 mmol, 3 equiv) at rt. After 8 h, the reaction was quenched with sat.  $NaHCO_3$  and extracted with  $Et_2O$ . The combined organic layer was washed with  $H_2O$  and brine, dried over  $MgSO_4$  and concentrated under reduced pressure. The resulting residue was purified by Flash chromatography (12-25%  $EtOAc$ /hexane) to afford **19** (144 mg, 94%).  $^1H$  NMR (400 MHz,  $CDCl_3$ ) (data for major diastereomer)  $\delta$  (ppm): 7.15-7.25 (m, 6H), 6.82-6.86 (m, 6H), 5.78-5.90 (m, 1H), 5.60-5.70 (m, 3H), 5.44 (d, 1H,  $J=15.6$  Hz), 5.32 (dd, 1H,  $J=8.6, 15.4$  Hz), 5.06-5.10 (m, 2H), 4.95 (s, 1H), 4.93 (s, 1H), 4.86-4.90 (m, 1H), 4.40-4.52 (m, 4H), 4.33 (d, 1H,  $J=11.6$  Hz), 4.18 (d, 1H,  $J=11.6$  Hz), 4.02-4.10 (m, 1H), 3.78 (s, 9H), 3.56-3.62 (m, 2H), 3.45-3.53 (m, 2H), 2.70 (b, 1H), 2.23-2.39 (m, 6H), 2.11-2.16 (m, 1H), 2.00-2.07 (m, 1H), 1.81-1.88 (m, 1H), 1.74-1.80 (m, 1H), 1.75 (d, 3H,  $J=6.2$  Hz), 1.73 (s, 3H), 1.57-1.66 (m, 1H), 1.28-1.34 (m, 1H), 1.13 (s, 3H), 1.07 (d, 3H,  $J=5.2$  Hz), 0.92 (d, 3H,  $J=7.6$  Hz), 0.89 (d, 3H,  $J=6.6$  Hz), 0.83 (d, 3H,  $J=6.6$  Hz);  $^{13}C$  NMR (100 MHz,  $CDCl_3$ ) (data for major diastereomer)  $\delta$  (ppm): 166.3, 162.6, 159.4, 159.2, 144.3, 136.5, 135.0, 131.6, 131.2, 130.9, 130.8, 130.7, 129.7, 129.4, 129.3, 128.2, 117.9, 117.5, 115.0, 114.0, 113.9, 113.8, 82.1, 77.1, 76.6, 75.13, 75.11, 74.9, 70.8, 70.4, 69.2, 55.5, 40.4, 39.3, 38.4, 38.3, 37.1, 35.2, 35.1, 33.7, 22.6, 20.3, 18.0, 16.5, 16.0, 15.9, 15.5; HRMS  $C_{56}H_{78}O_{10}$   $[M+Na]^+$  calc'd 933.5487, found. 933.5501; IR  $\nu_{max}$  (film) 3497, 2967, 2927, 2869, 1708, 1641, 1610, 1512, 1459, 1245, 1169, 1031, 822  $cm^{-1}$ .

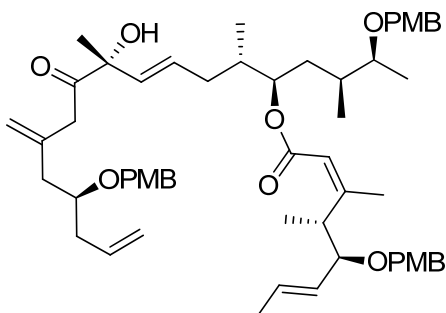

**Synthesis of (20).** To a stirred solution of **19** (144 mg, 0.16 mmol) in CH<sub>2</sub>Cl<sub>2</sub> (1.6 mL) was added (*i*-Pr)<sub>2</sub>NEt (165 mg, 1.28 mmol, 8 equiv), DMSO (0.18 mL) and SO<sub>3</sub>·Py (102 mg, 0.64 mmol, 4 equiv) at 0 °C. After 30 min at rt., the reaction was quenched with sat. NaHCO<sub>3</sub> and diluted with Et<sub>2</sub>O. The organic layer was washed successively with H<sub>2</sub>O, brine, and dried over MgSO<sub>4</sub>. After concentration under reduced pressure, the resulting residue was purified by Flash chromatography (24-30% Et<sub>2</sub>O/hexane) to afford **20** (110 mg, 70%) as a colorless oil.  $[\alpha]_D^{20} = -11.8$  ( $c=1.5$ , CHCl<sub>3</sub>); <sup>1</sup>H NMR (400 MHz, CDCl<sub>3</sub>)  $\delta$  (ppm): 7.15-7.25 (m, 6H), 6.82-6.86 (m, 6H), 5.61-5.85 (m, 4H), 5.42 (d, 1H,  $J=15.2$  Hz), 5.32 (dd, 1H,  $J=8.6$ , 15.4 Hz), 5.05-5.10 (m, 2H), 5.01 (s, 1H), 4.87 (s, 1H), 4.84-4.92 (m, 1H), 4.45-4.51 (m, 3H), 4.39 (d, 1H,  $J=11.2$  Hz), 4.32 (d, 1H  $J=11.6$  Hz), 4.19 (d, 1H,  $J=11.6$  Hz), 4.01-4.09 (m, 1H), 3.86 (s, 1H), 3.78 (s, 9H), 3.47-3.61 (m, 3H), 3.22-3.32 (m, 2H), 2.23-2.33 (m, 4H), 2.12-2.20 (m, 1H), 1.60-1.80 (m, 3H), 1.75 (d, 3H,  $J=6.6$  Hz), 1.73 (s, 3H), 1.56-1.62 (m, 1H), 1.34 (s, 3H), 1.28-1.34 (m, 1H), 1.08 (d, 3H,  $J=6.2$  Hz), 0.93 (d, 3H,  $J=7.0$  Hz), 0.89 (d, 3H,  $J=6.4$  Hz), 0.79 (d, 3H,  $J=6.6$  Hz); <sup>13</sup>C NMR (100 MHz, CDCl<sub>3</sub>)  $\delta$  (ppm): 210.1, 166.2, 162.6, 159.4, 159.2, 159.0, 140.0, 134.8, 132.5, 131.5, 131.4, 131.2, 130.90, 130.86, 130.75, 129.6, 129.4, 129.29, 128.26, 117.8, 117.5, 117.2, 114.0, 113.9, 113.8, 82.1, 79.2, 77.1, 76.6, 75.2, 70.7, 70.4, 69.2, 55.50, 55.48, 43.7, 40.5, 39.3, 38.4, 36.9, 35.2, 34.9, 33.6, 25.0, 20.4, 18.0, 16.5, 15.9, 15.8, 15.5; HRMS C<sub>56</sub>H<sub>76</sub>O<sub>10</sub> [M+Na]<sup>+</sup> calc'd 931.5331, found. 931.5323; IR  $\nu_{\max}$  (film) 3470, 2954, 2927, 2869, 1715, 1708, 1641, 1610, 1512, 1459, 1245, 1169, 1031, 822 cm<sup>-1</sup>.

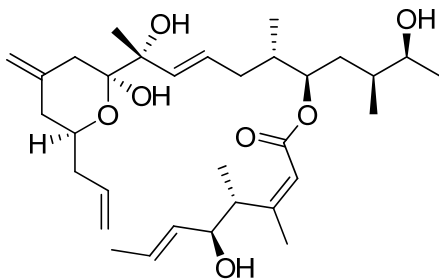

**Synthesis of (10).** To a stirred solution of **20** (110 mg, 0.12 mmol) in CH<sub>2</sub>Cl<sub>2</sub> (6 mL) + pH=7 buffer (3 mL) was added DDQ (158 mg, 0.72 mmol, 6 equiv) at rt. After 20 min, the reaction was quenched with sat. NaHCO<sub>3</sub> solution and extracted with CH<sub>2</sub>Cl<sub>2</sub> (3 x 20 mL). The combined organic layer was dried over MgSO<sub>4</sub>, and concentrated under reduced pressure. The resulting residue was purified by Flash chromatography (30-33% EtOAc/hexane) to afford **10** (44mg, 67%) as a colorless oil.

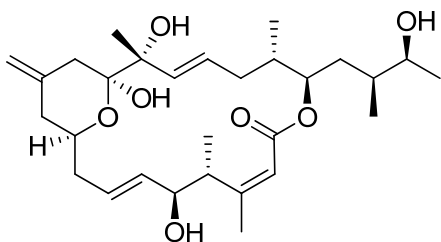

**Synthesis of (1).** To a stirred solution of **10** (18.8 mg, 0.034 mmol) in CH<sub>2</sub>Cl<sub>2</sub> (34 mL) was added 2<sup>nd</sup> generation Grubbs catalyst (3 mg, 0.0034mmol, 0.1 equiv) at rt. After 3 h, the solvent was removed under reduced pressure. The resulting residue was purified by Flash chromatography (35-45% EtOAc/hexane) to afford (*E*)-isomer **1** (9 mg, 52%) and (*Z*)-isomer **21** (3.6 mg, 21%).

(*E*)-isomer **1** :  $[\alpha]_D^{20} = -27.8$  ( $c=0.3$ , CHCl<sub>3</sub>); <sup>1</sup>H NMR (400 MHz, CDCl<sub>3</sub>)  $\delta$  (ppm): 5.79-5.89 (m, 3H), 5.77 (s, 1H), 5.67 (dd, 1H,  $J = 6.8$  Hz, 15.5 Hz), 4.95-5.01 (m, 1H), 4.85 (s, 1H), 4.83 (s, 1H), 3.92-4.06 (m, 3H), 3.80-3.86 (m, 1H), 3.25 (s, 1H), 2.63 (s, 1H), 2.09-2.34 (m, 7H), 1.82-2.02 (m, 2H), 1.93 (s, 3H), 1.78 (ddd, 1H,  $J = 3.4, 7.8, 14.2$  Hz), 1.42-1.55 (m, 1H), 1.25-1.35 (m, 1H), 1.31 (s, 3H), 1.09 (d, 3H,  $J = 6.6$  Hz), 1.07 (d, 3H,  $J = 7.8$  Hz), 0.98 (d, 3H,  $J = 7.0$  Hz), 0.87 (d, 3H,  $J = 6.8$  Hz); <sup>13</sup>C NMR (100 MHz, CDCl<sub>3</sub>)  $\delta$  (ppm): 166.6(C), 160.3(C), 142.0(C), 135.2(CH), 133.0(CH), 129.9(CH), 127.5(CH), 119.2(CH), 111.1(CH<sub>2</sub>), 99.4(C), 77.4(C), 75.3(CH), 74.7(CH), 70.6(CH), 69.6(CH), 41.0(CH), 40.0(CH<sub>2</sub>), 38.1(CH<sub>2</sub>), 37.7(CH<sub>2</sub>), 37.0(CH), 35.9(CH), 34.54(CH<sub>2</sub>), 34.50(CH<sub>2</sub>), 21.1(CH<sub>3</sub>), 20.9(CH<sub>3</sub>), 20.3(CH<sub>3</sub>), 16.2(CH<sub>3</sub>), 16.0(CH<sub>3</sub>), 15.2(CH<sub>3</sub>); HRMS C<sub>29</sub>H<sub>46</sub>O<sub>7</sub> [M+Na]<sup>+</sup> calc'd 529.3136, found. 529.3129; IR  $\nu_{\max}$  (film) 3452, 2963, 2923, 2869, 1694, 1632, 1450, 1383, 1218, 1156, 965 cm<sup>-1</sup>.

(*Z*)-isomer **21**:  $[\alpha]_D^{20} = -29.1$  ( $c=0.4$ , CHCl<sub>3</sub>); <sup>1</sup>H NMR (400 MHz, CDCl<sub>3</sub>)  $\delta$  (ppm): 5.81-5.87 (m, 2H), 5.77 (s, 1H), 5.55-5.67 (m, 2H), 4.85-4.91 (m, 1H), 4.86 (s, 1H), 4.84 (s, 1H), 4.27-4.38 (m, 1H), 4.18-4.25 (m, 1H), 3.90-3.99 (m, 1H), 3.77-3.82 (m, 1H), 3.73 (s, 1H), 2.18-2.46 (m, 6H), 1.87-2.00 (m, 3H), 1.95 (s, 3H), 1.78 (dd, 1H,  $J = 8.2, 12.4$  Hz), 1.42-1.50 (m, 1H), 1.25-1.35 (m, 1H), 1.26 (s, 3H), 1.09 (d, 3H,  $J = 5.5$  Hz), 1.08 (d, 3H,  $J = 6.2$  Hz), 0.95 (d, 3H,  $J = 6.8$  Hz), 0.83 (d, 3H,  $J = 6.8$  Hz); <sup>13</sup>C NMR (100 MHz, CDCl<sub>3</sub>)  $\delta$  (ppm): 166.3(C), 162.8(C), 142.0(C), 135.5(CH), 132.7(CH), 129.8(CH), 125.7(CH), 118.4(CH), 111.2(CH<sub>2</sub>), 100.0(C), 77.7(C), 73.3(CH), 71.7(CH), 70.8(CH), 69.5(CH), 40.4(CH<sub>2</sub>), 39.7(CH), 37.7(CH), 37.0(CH<sub>2</sub>), 35.9(CH), 34.7(CH<sub>2</sub>), 34.6(CH<sub>2</sub>), 34.2(CH<sub>2</sub>), 22.8(CH<sub>3</sub>), 22.0(CH<sub>3</sub>), 20.3(CH<sub>3</sub>), 15.51(CH<sub>3</sub>), 15.46(CH<sub>3</sub>), 15.42(CH<sub>3</sub>); HRMS C<sub>29</sub>H<sub>46</sub>O<sub>7</sub> [M+Na]<sup>+</sup> calc'd 529.3136, found. 529.3135; IR  $\nu_{\max}$  (film) 3439, 2967, 2923, 2869, 1694, 1632, 1450, 1383, 1205, 1160, 965 cm<sup>-1</sup>.

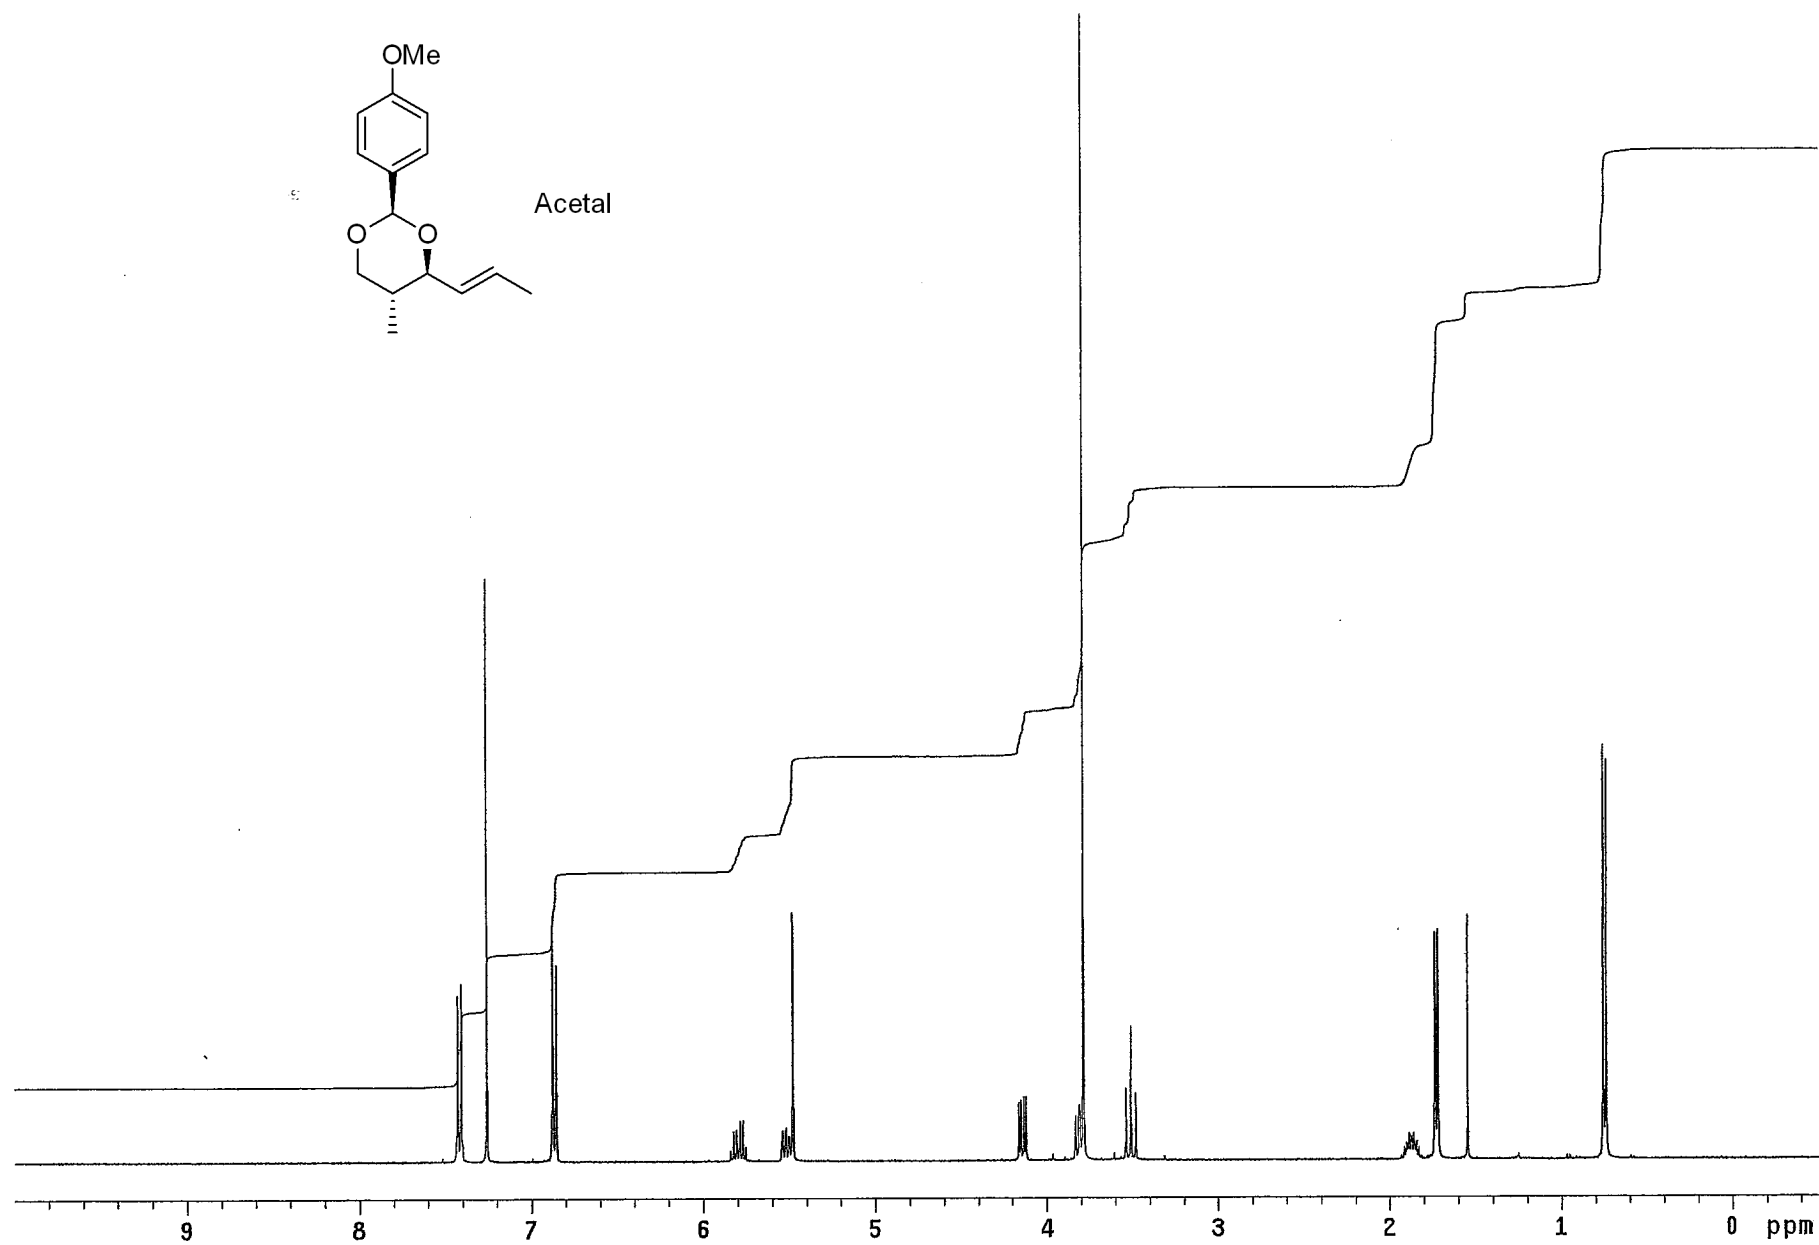

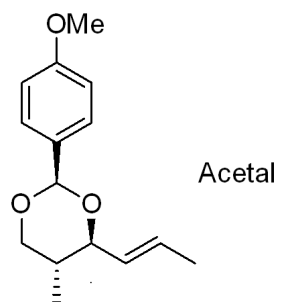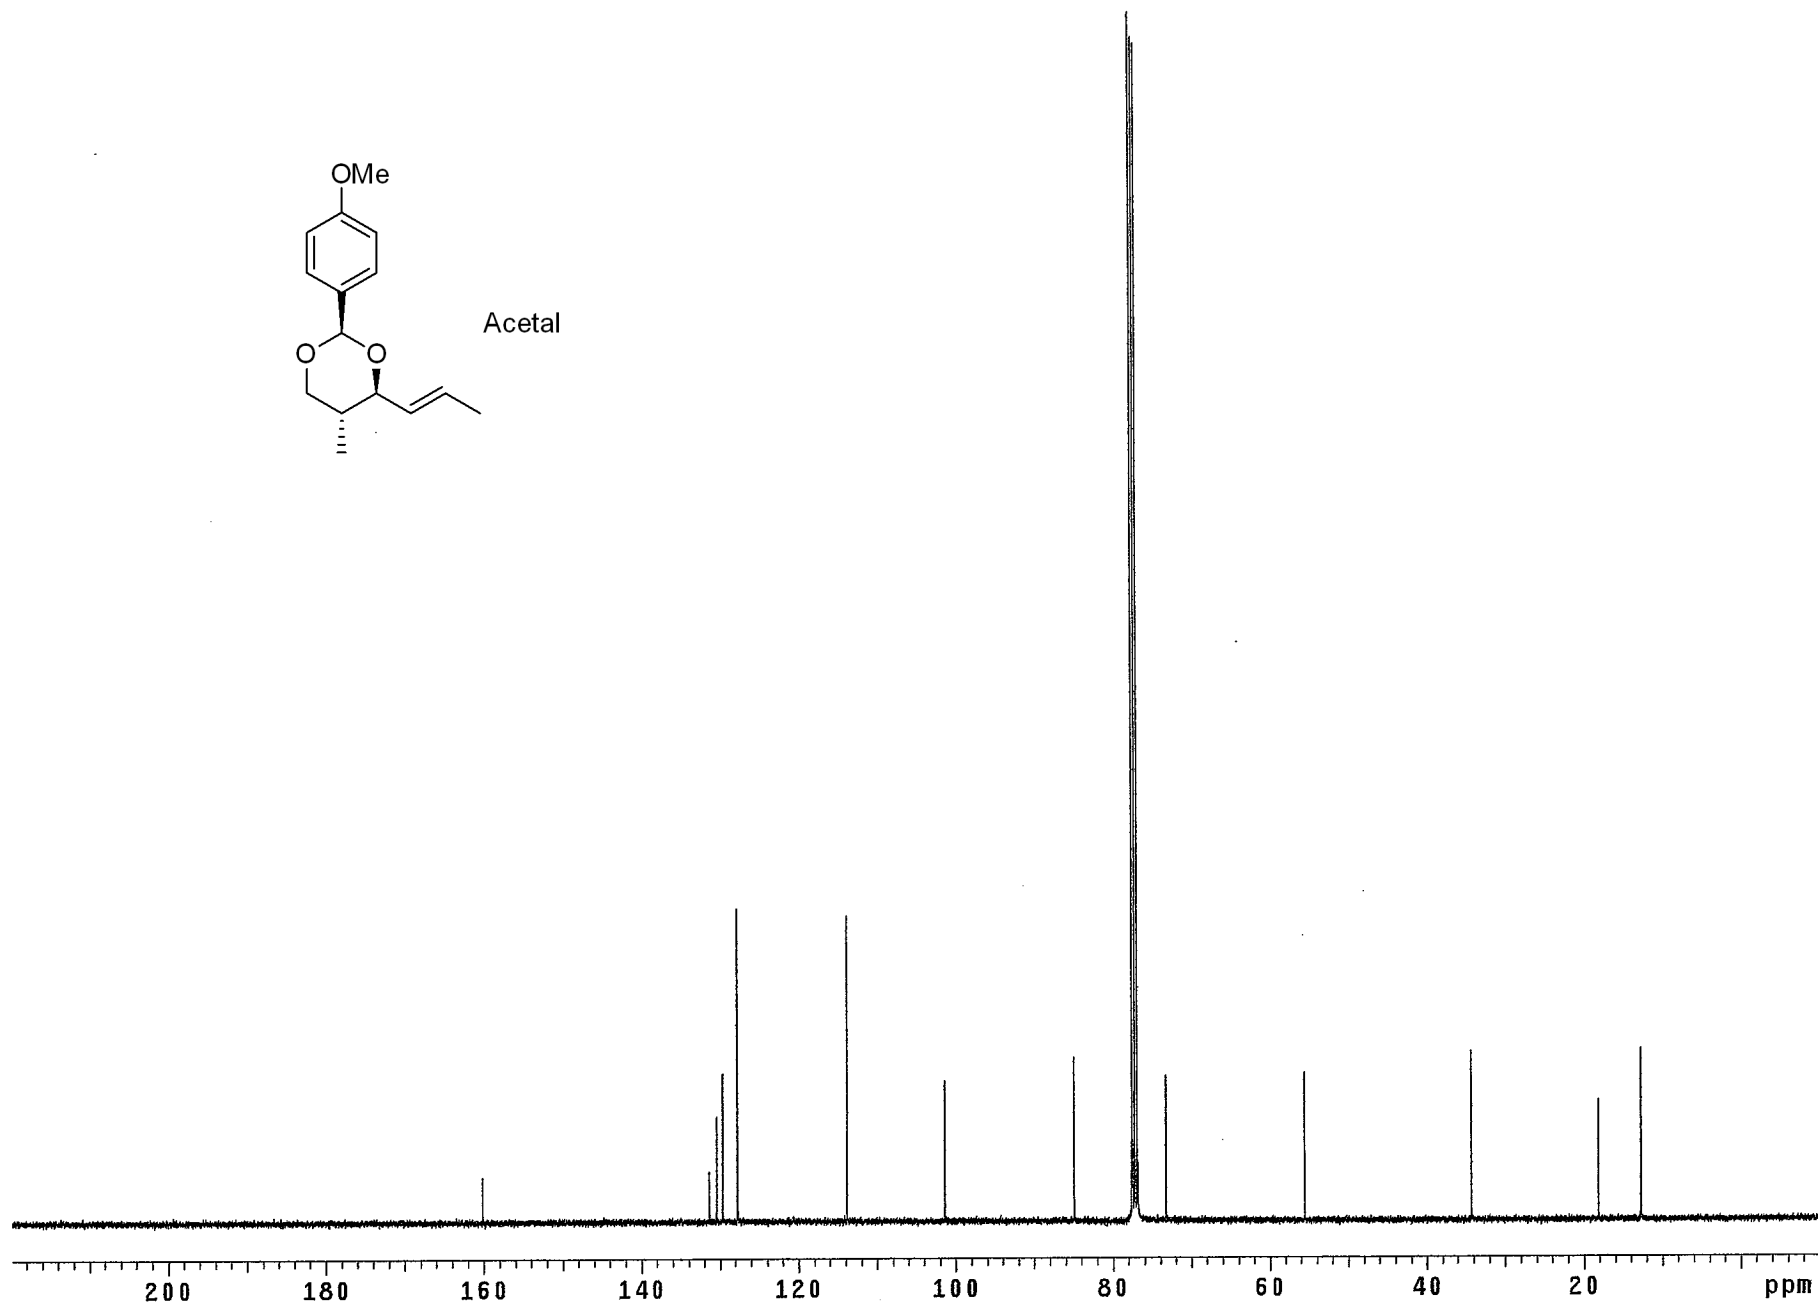

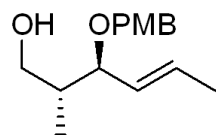

**5**

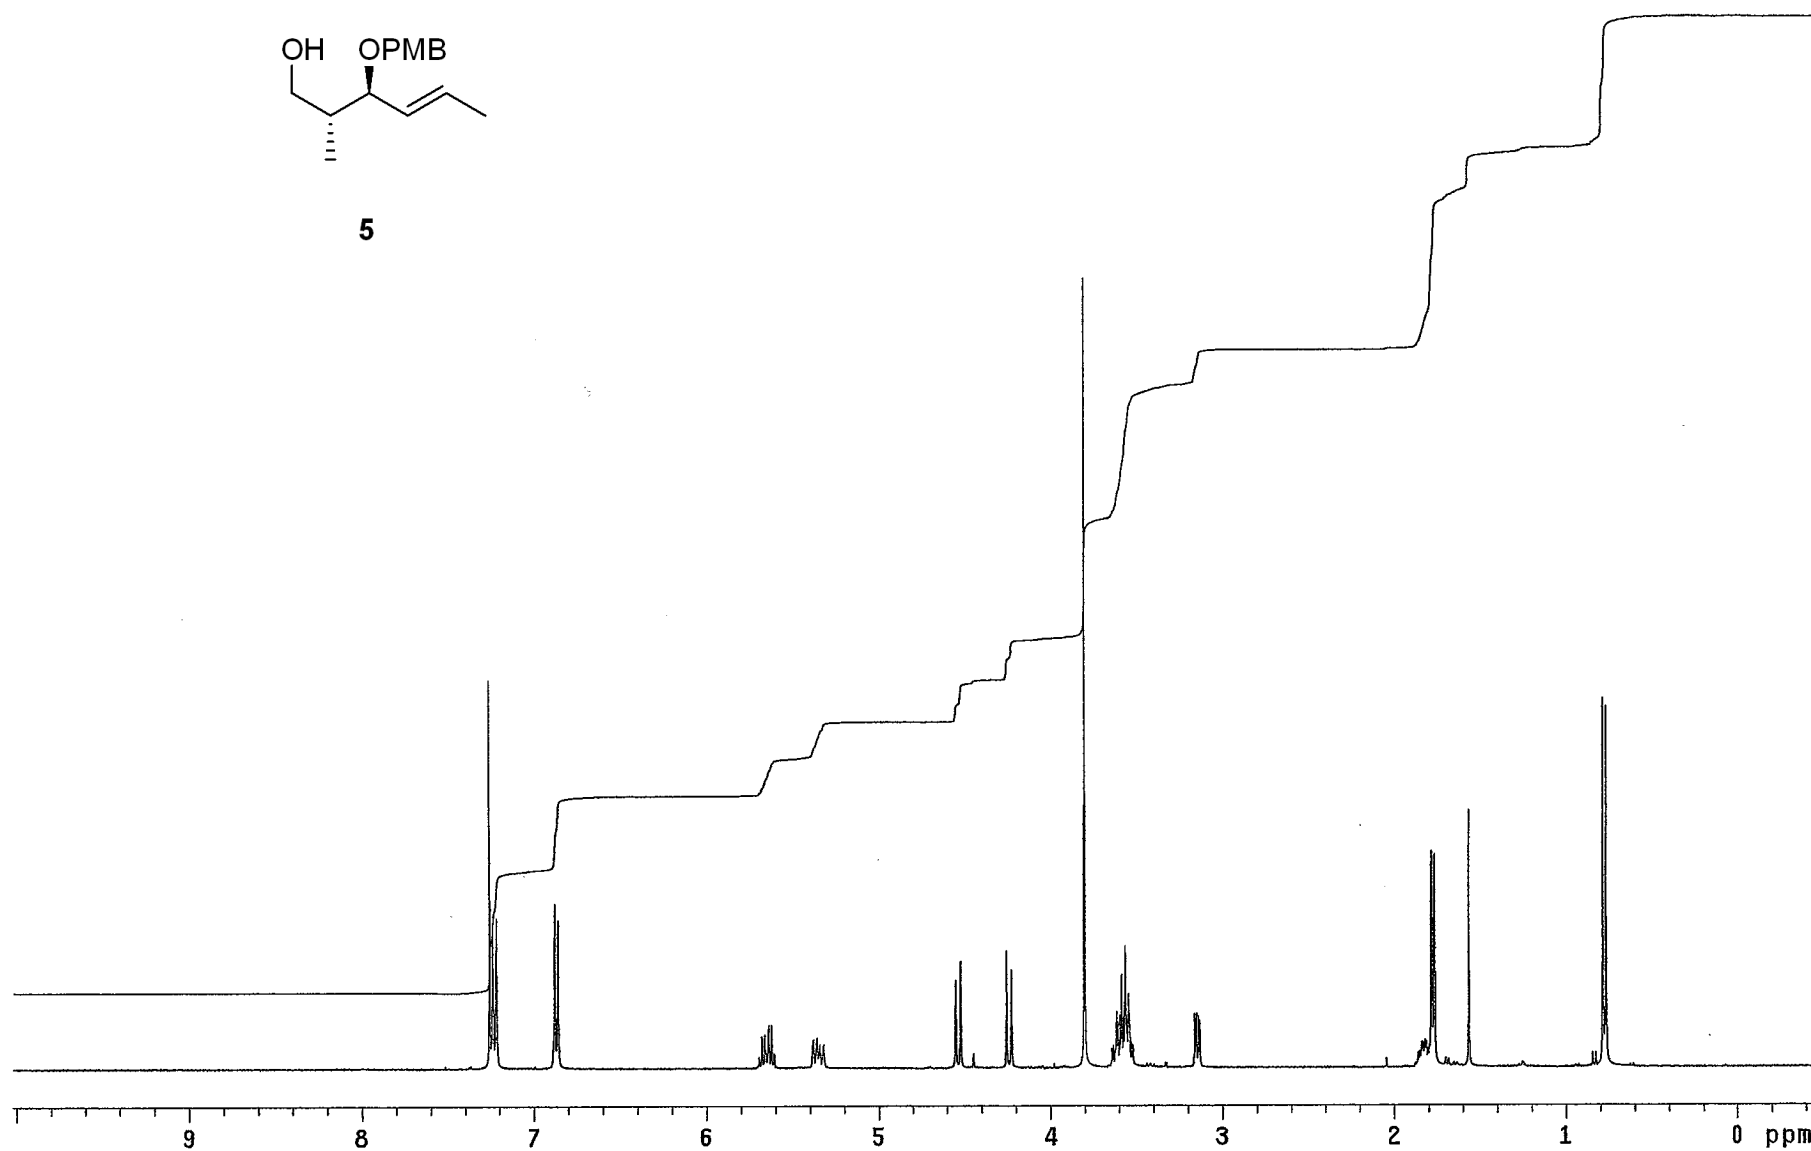

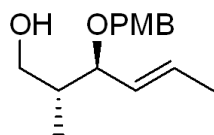

**5**

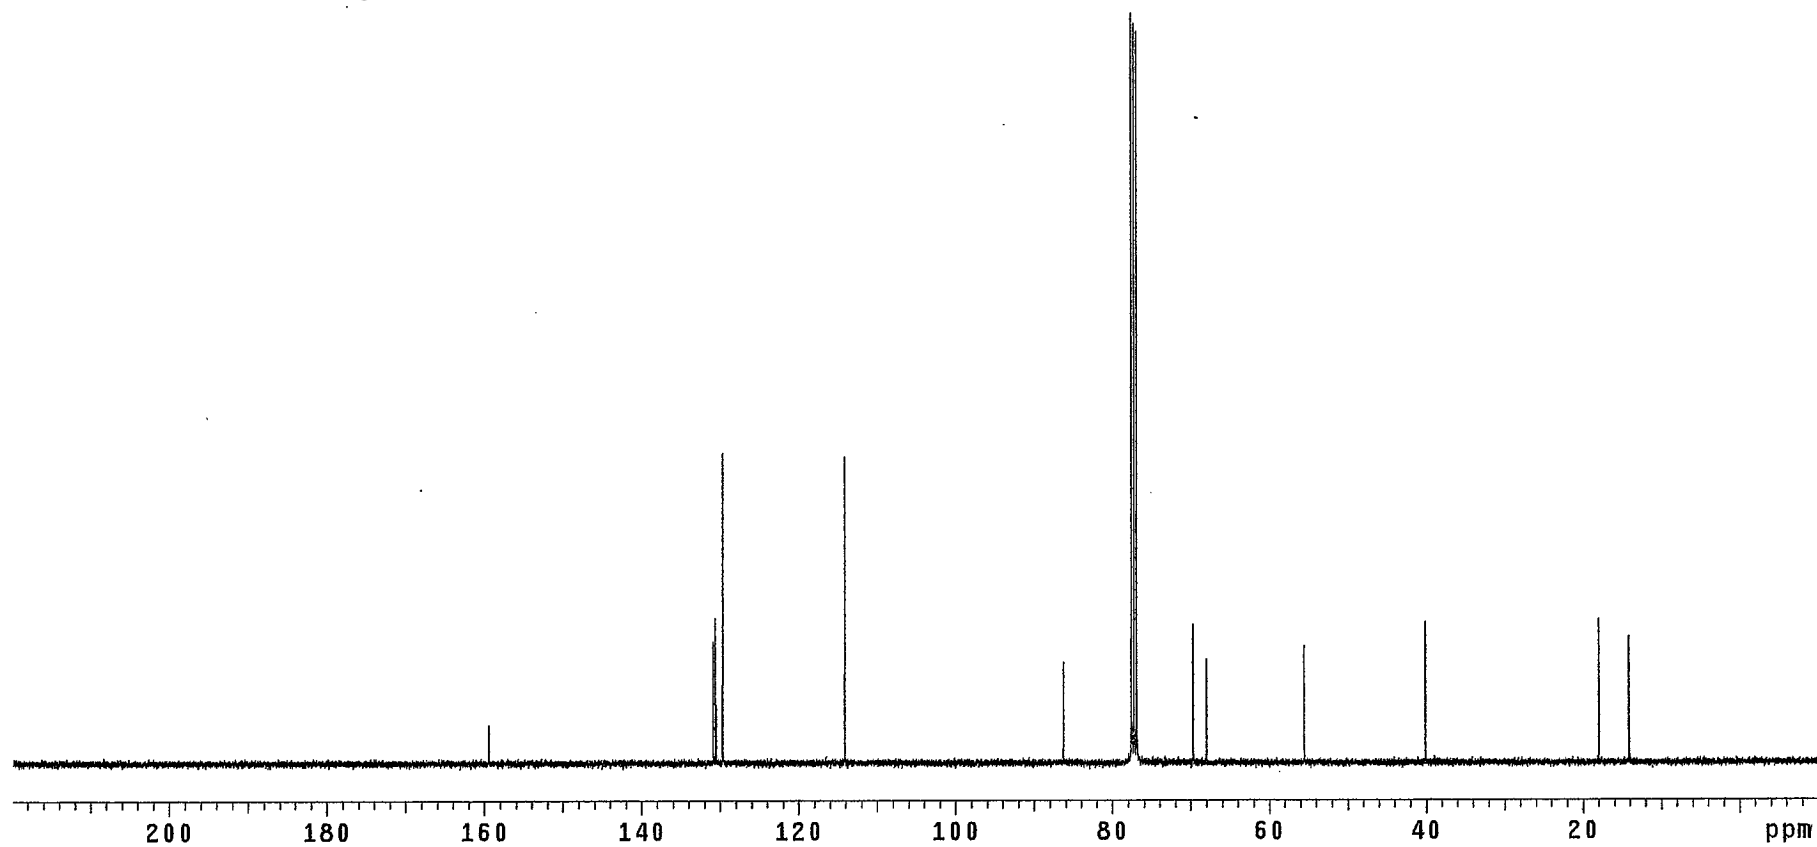



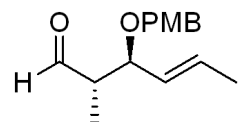

6

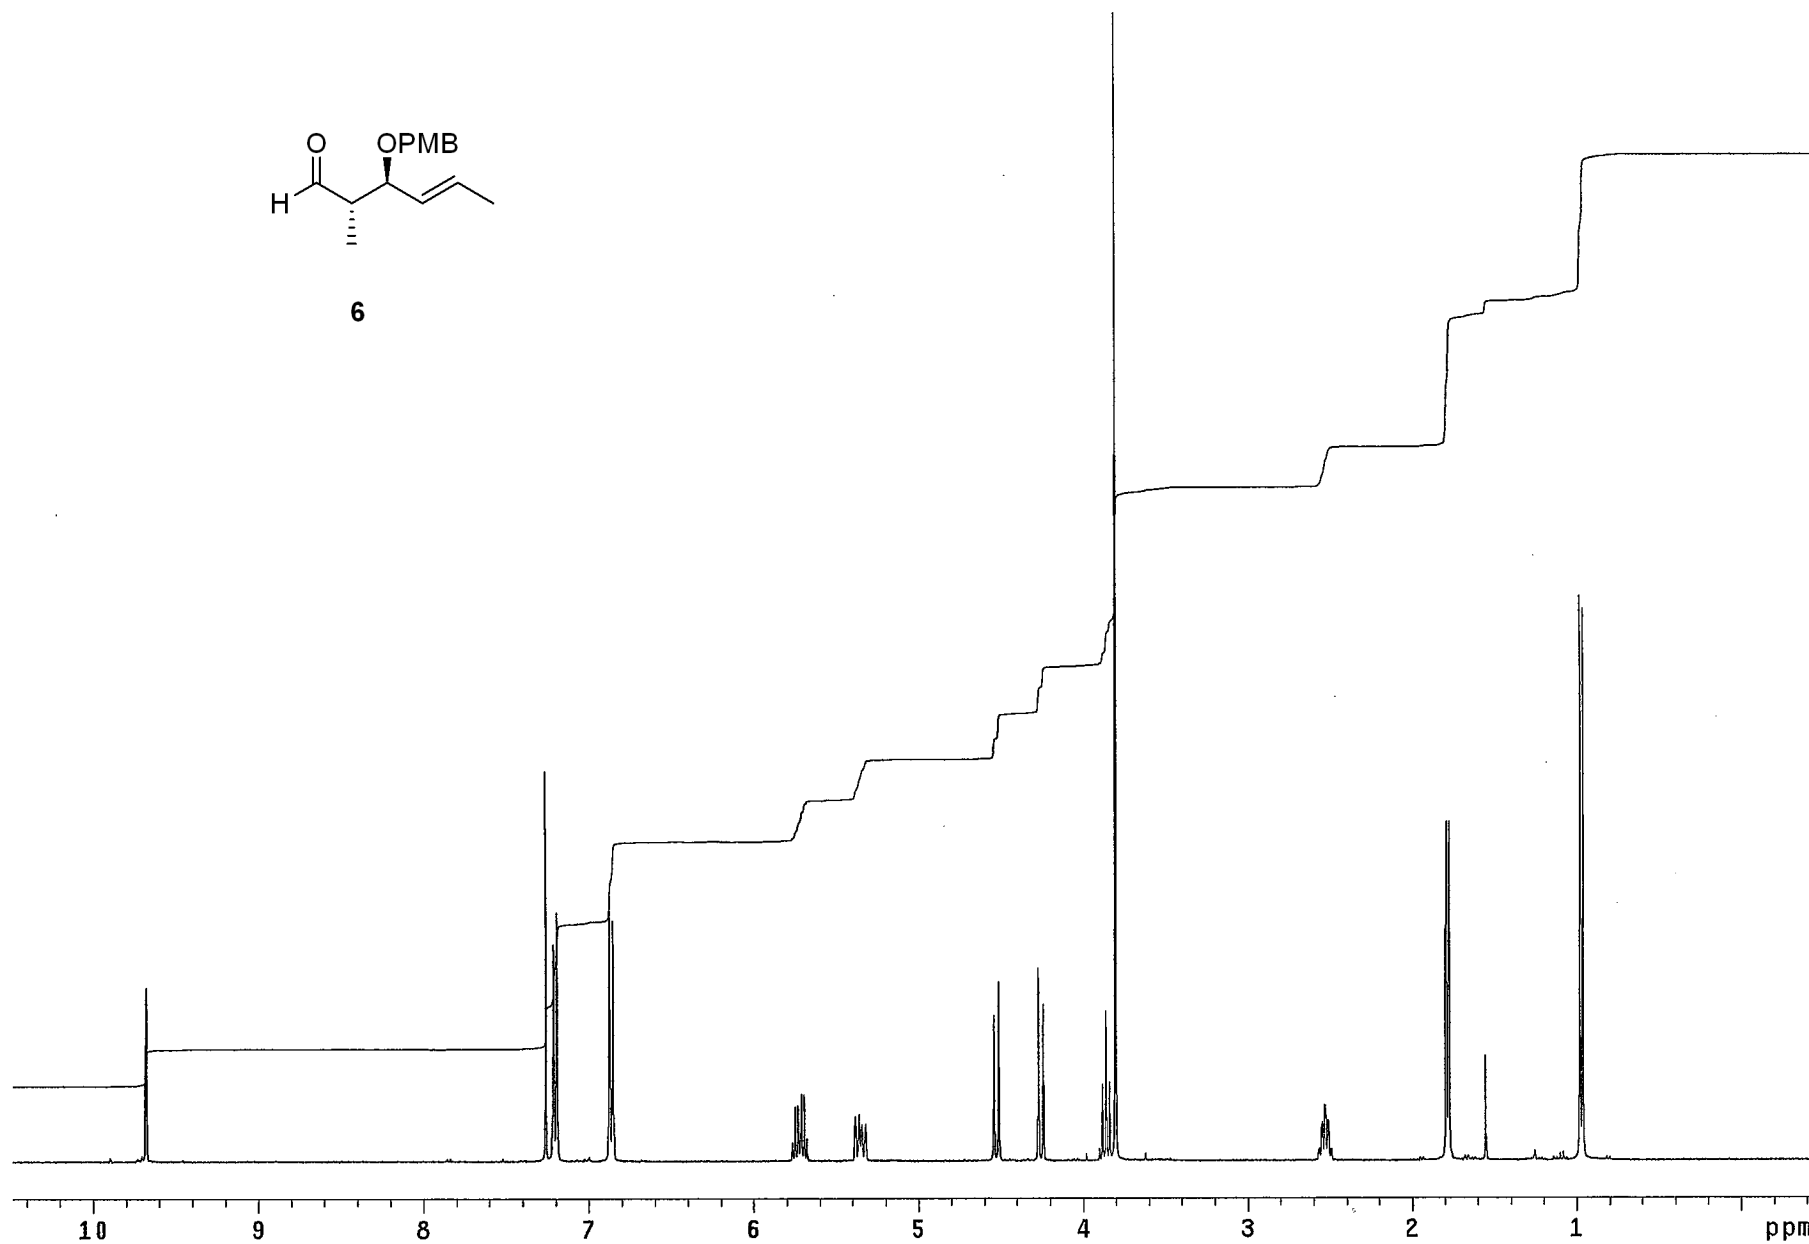

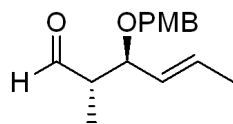

**6**

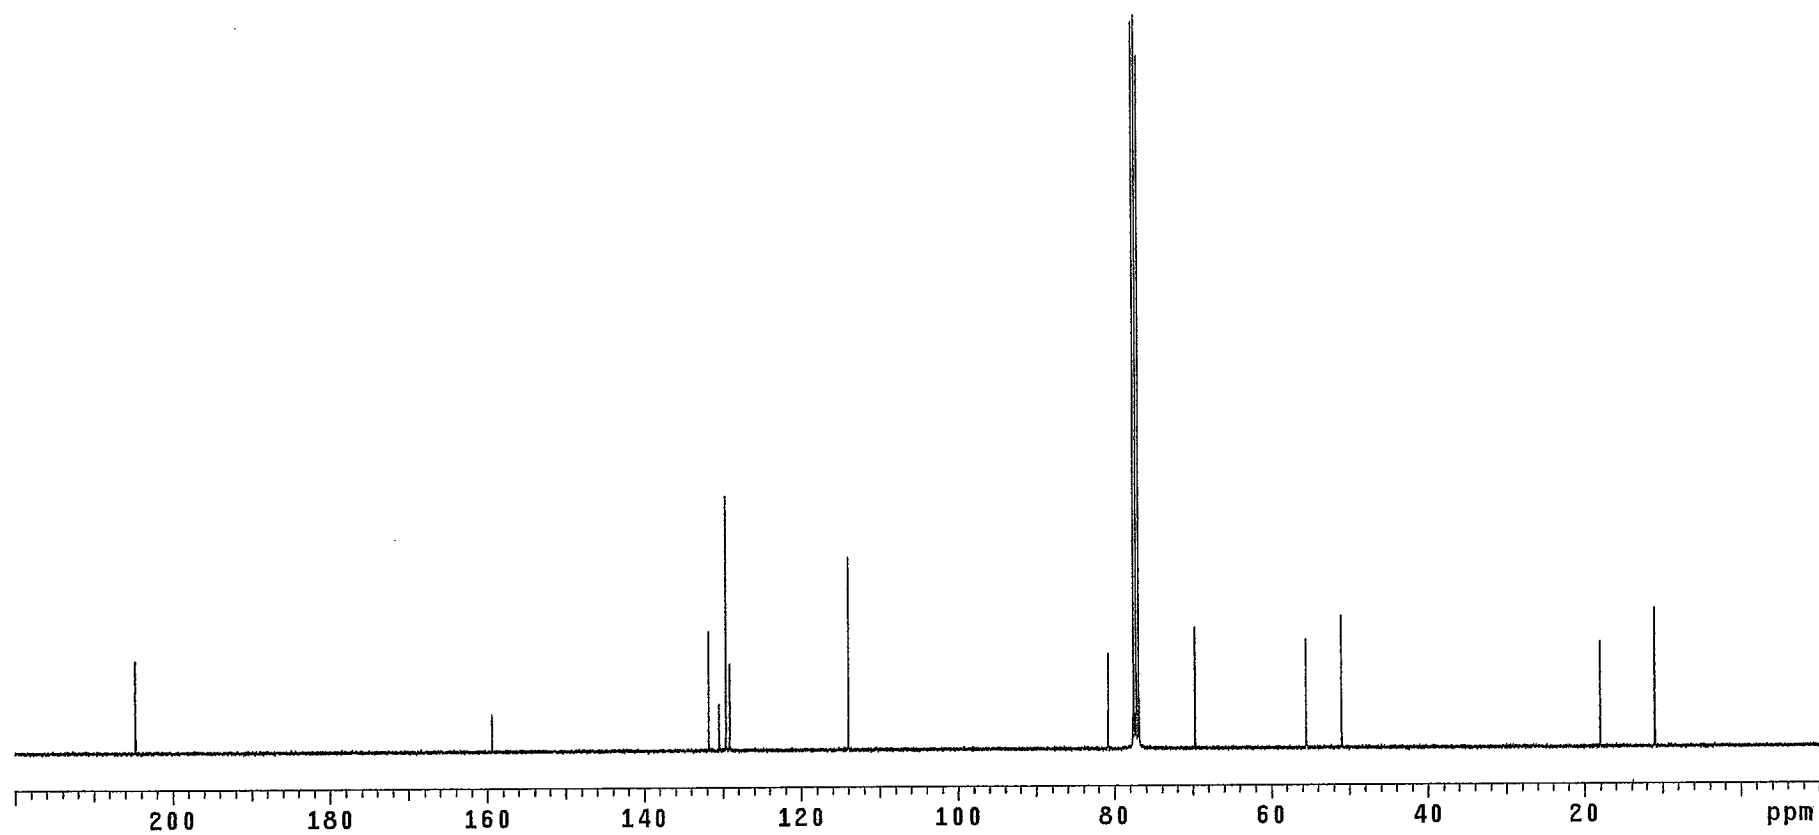

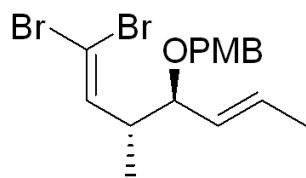

Dibromoalkene

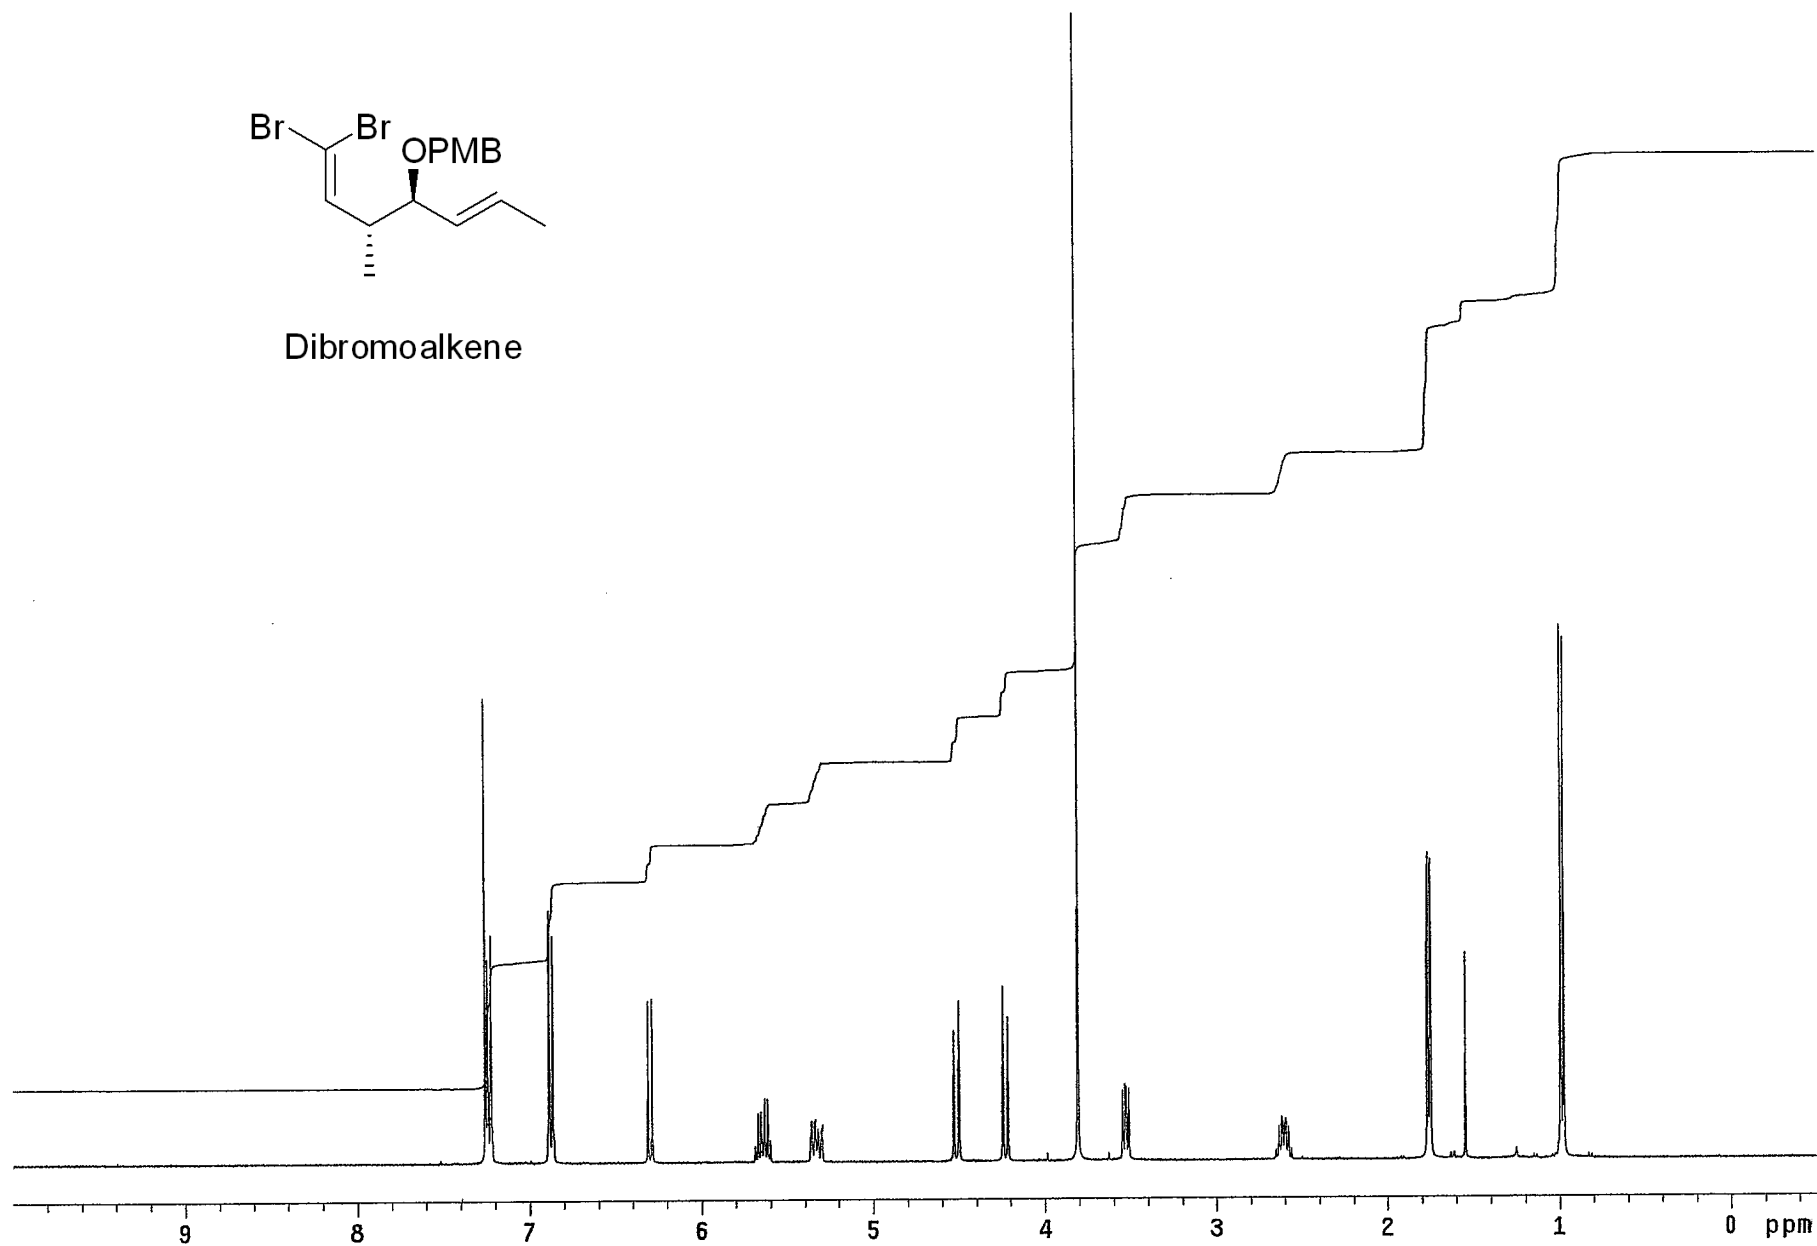

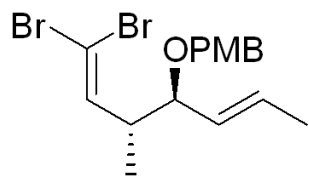

Dibromoalkene

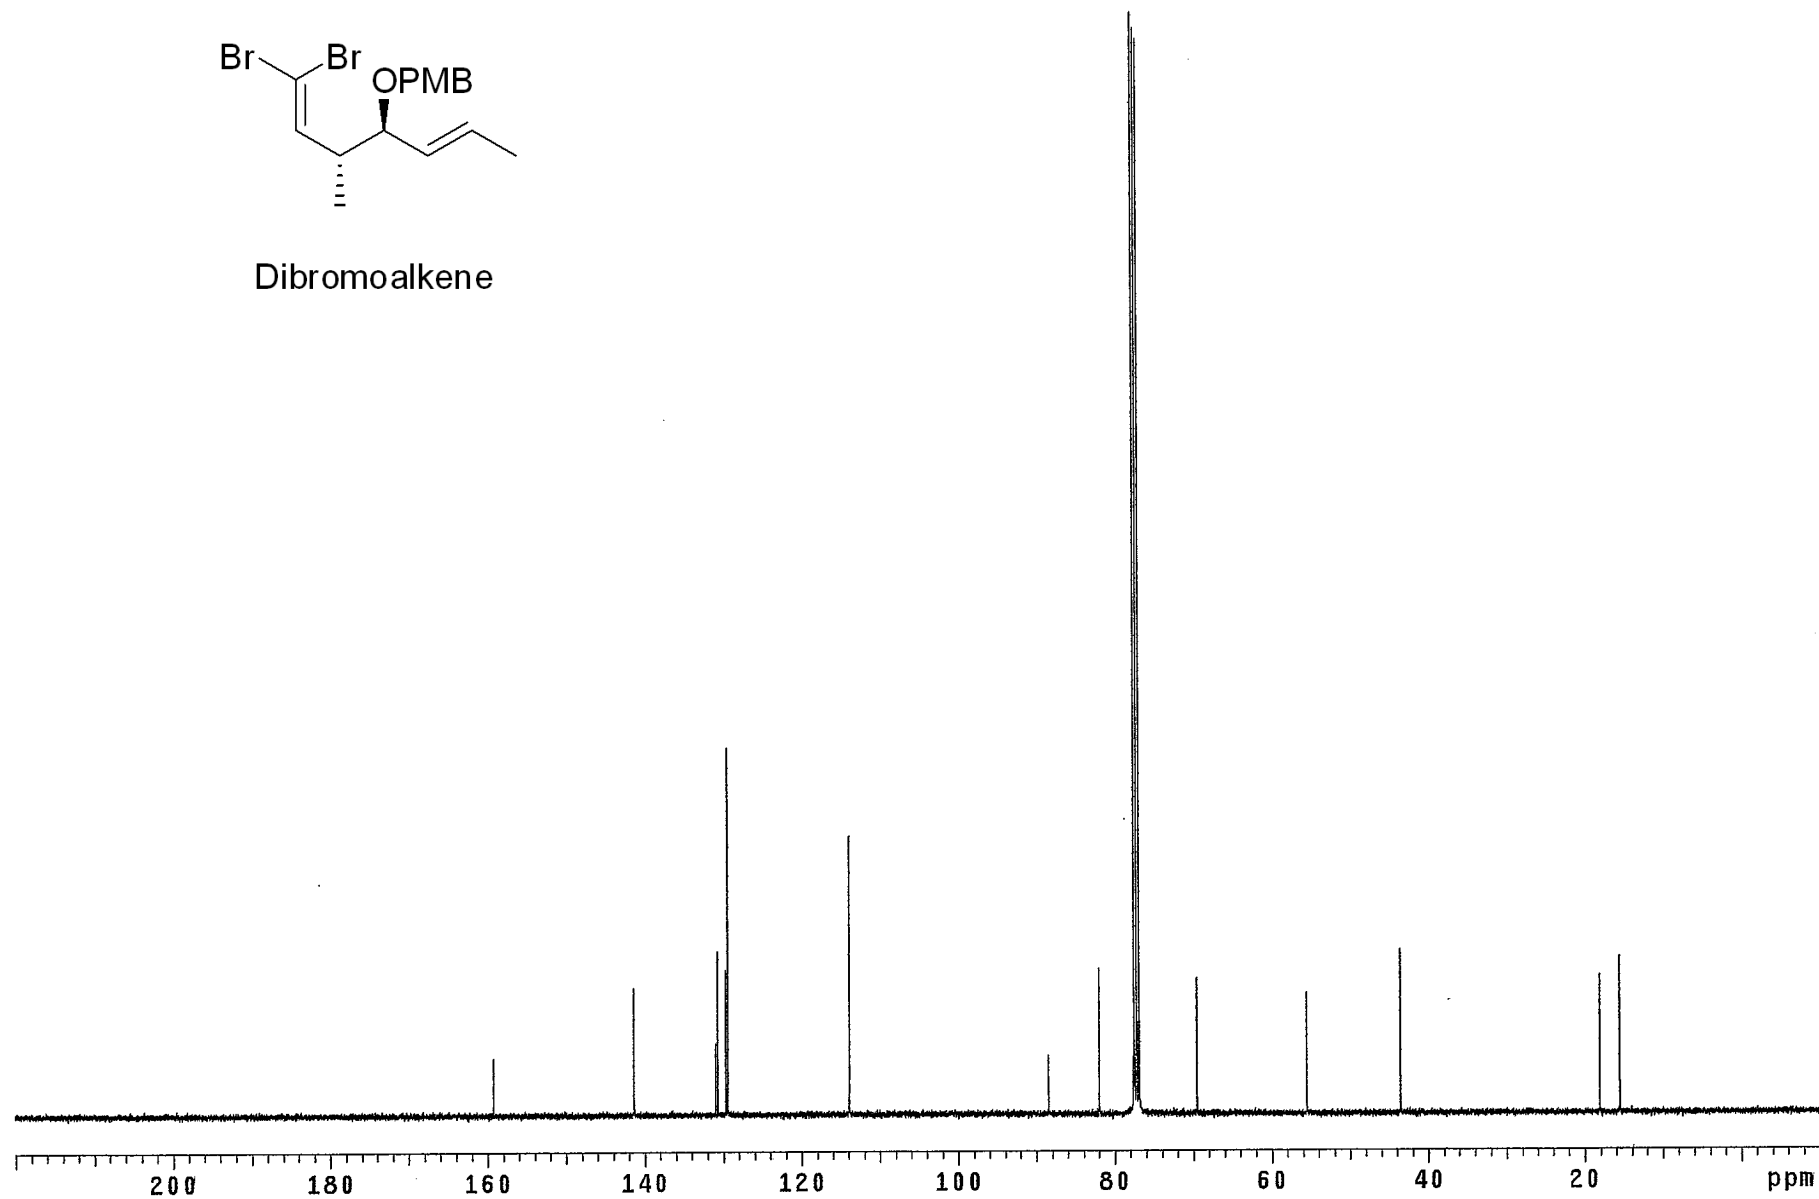

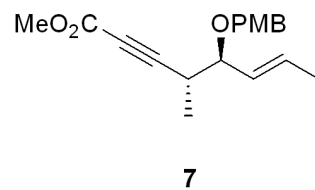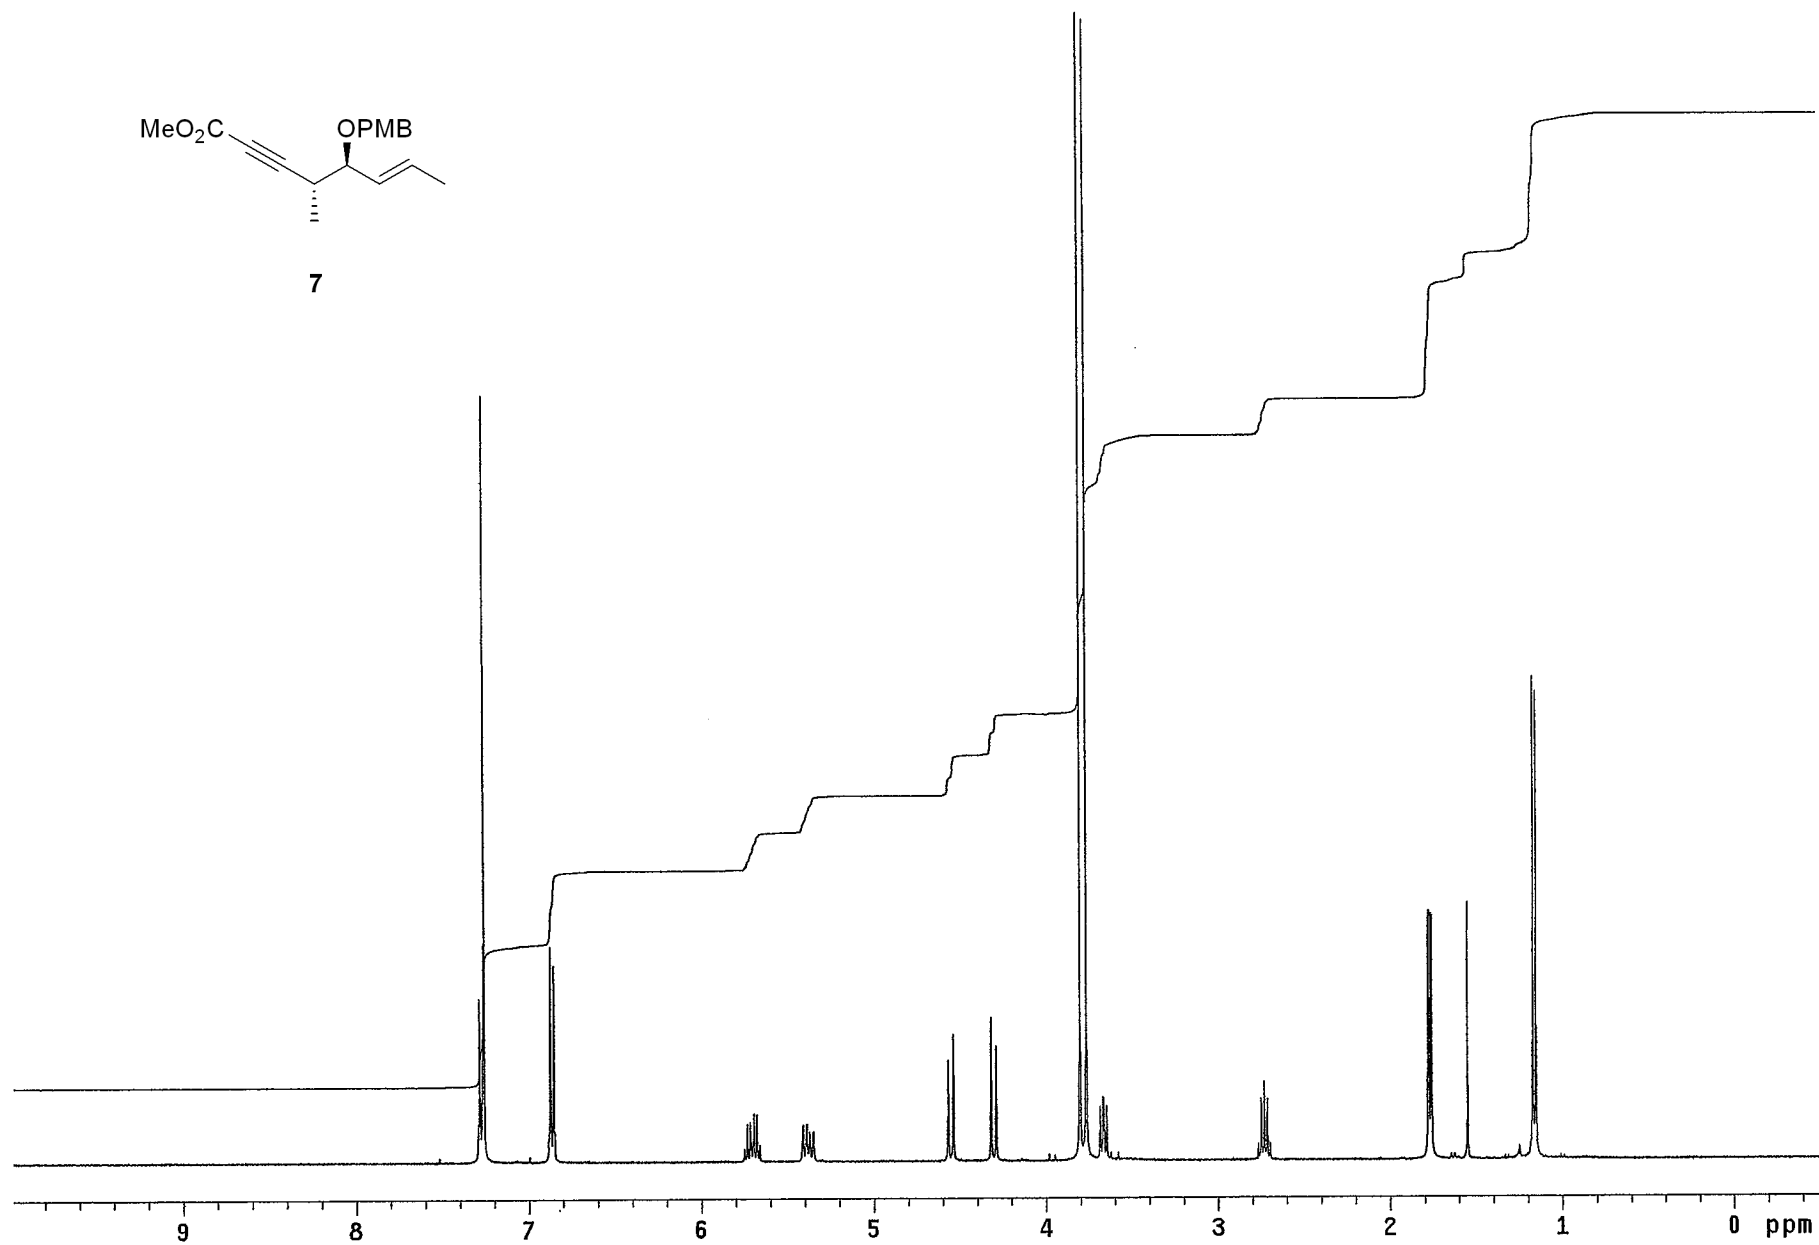

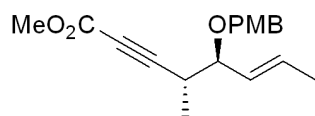

7

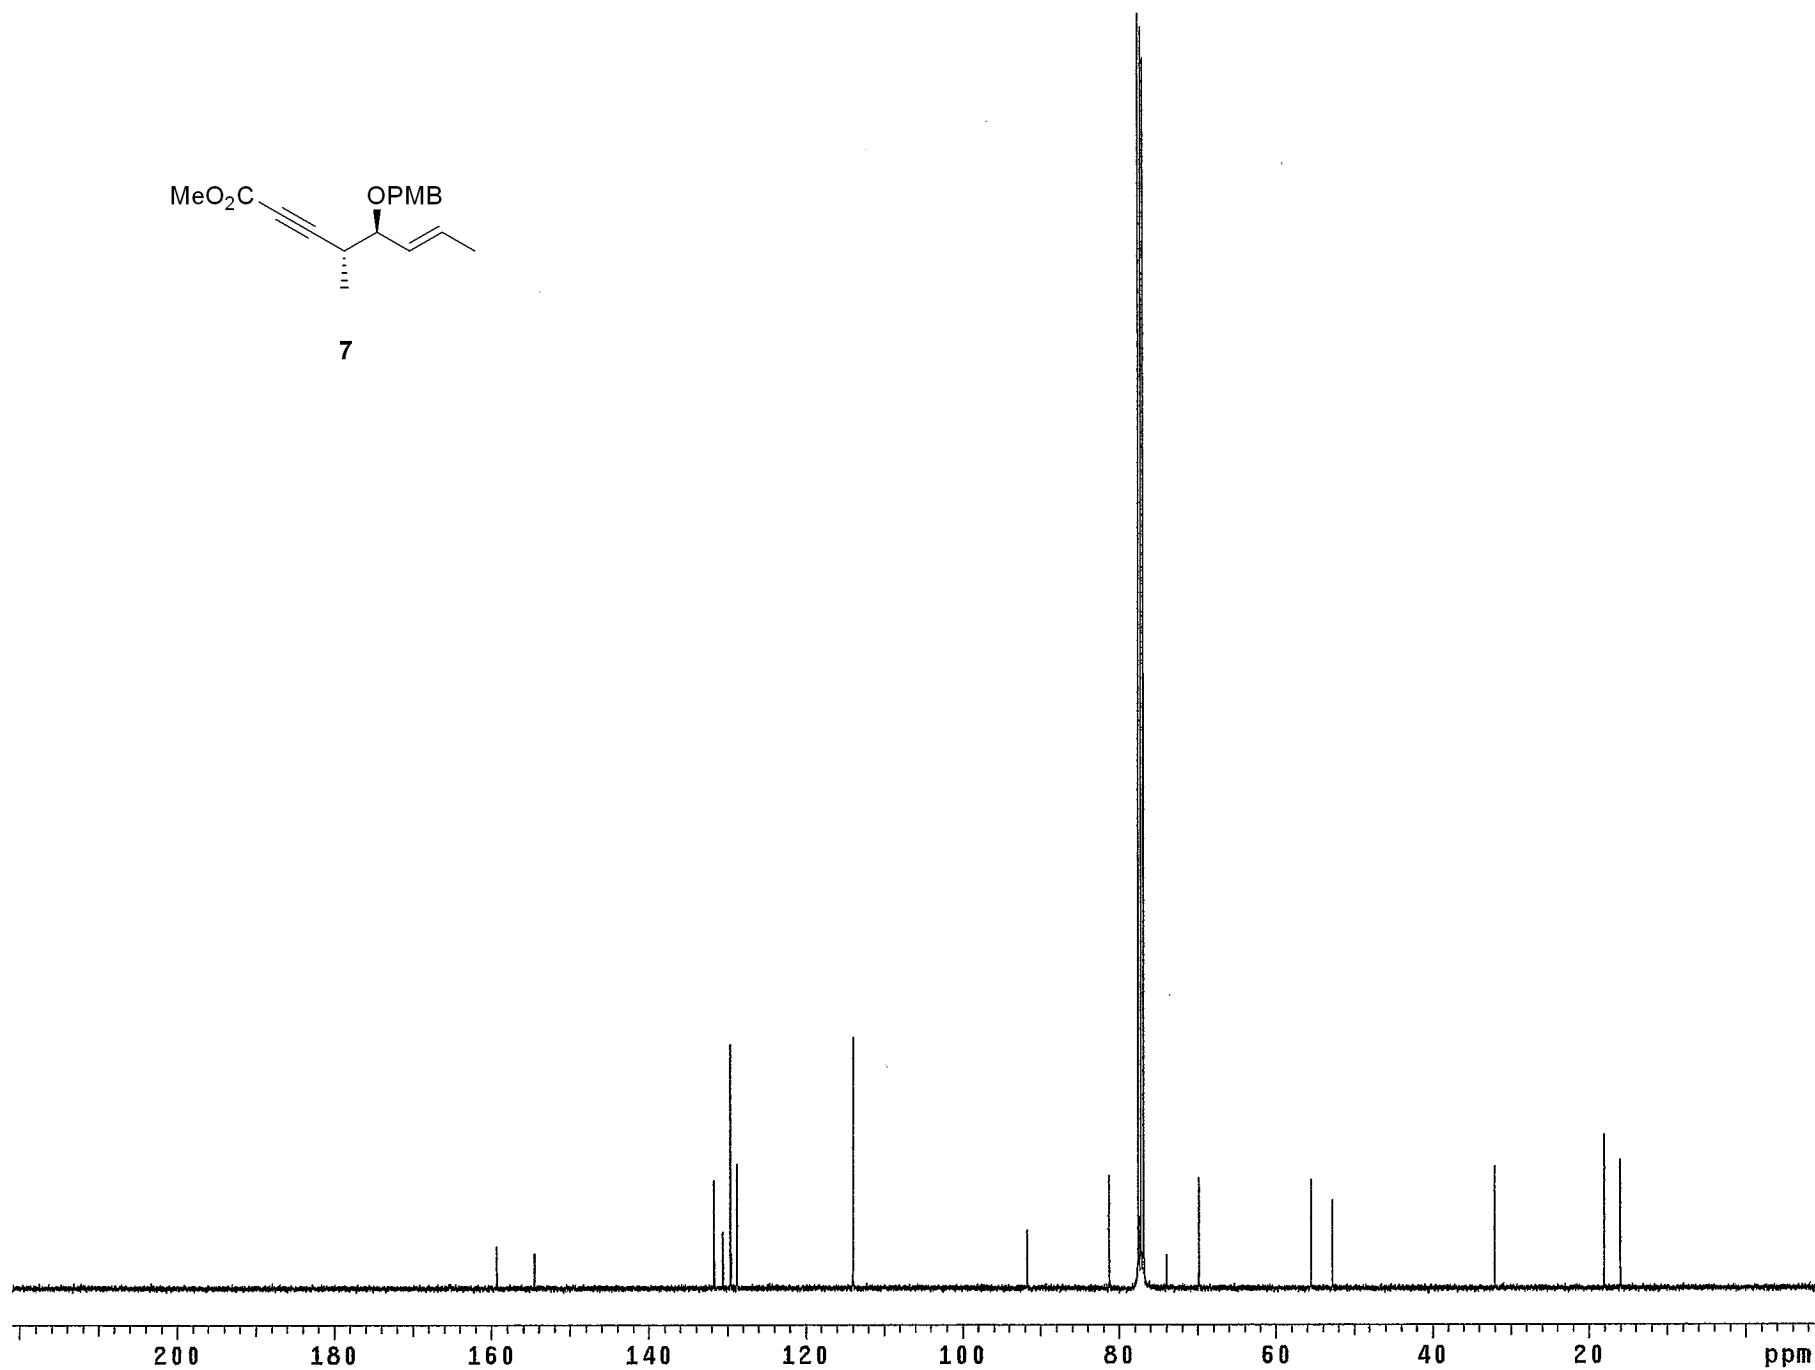

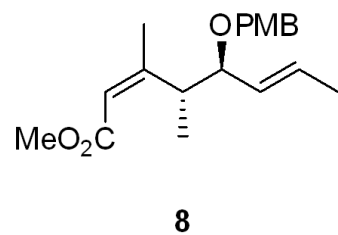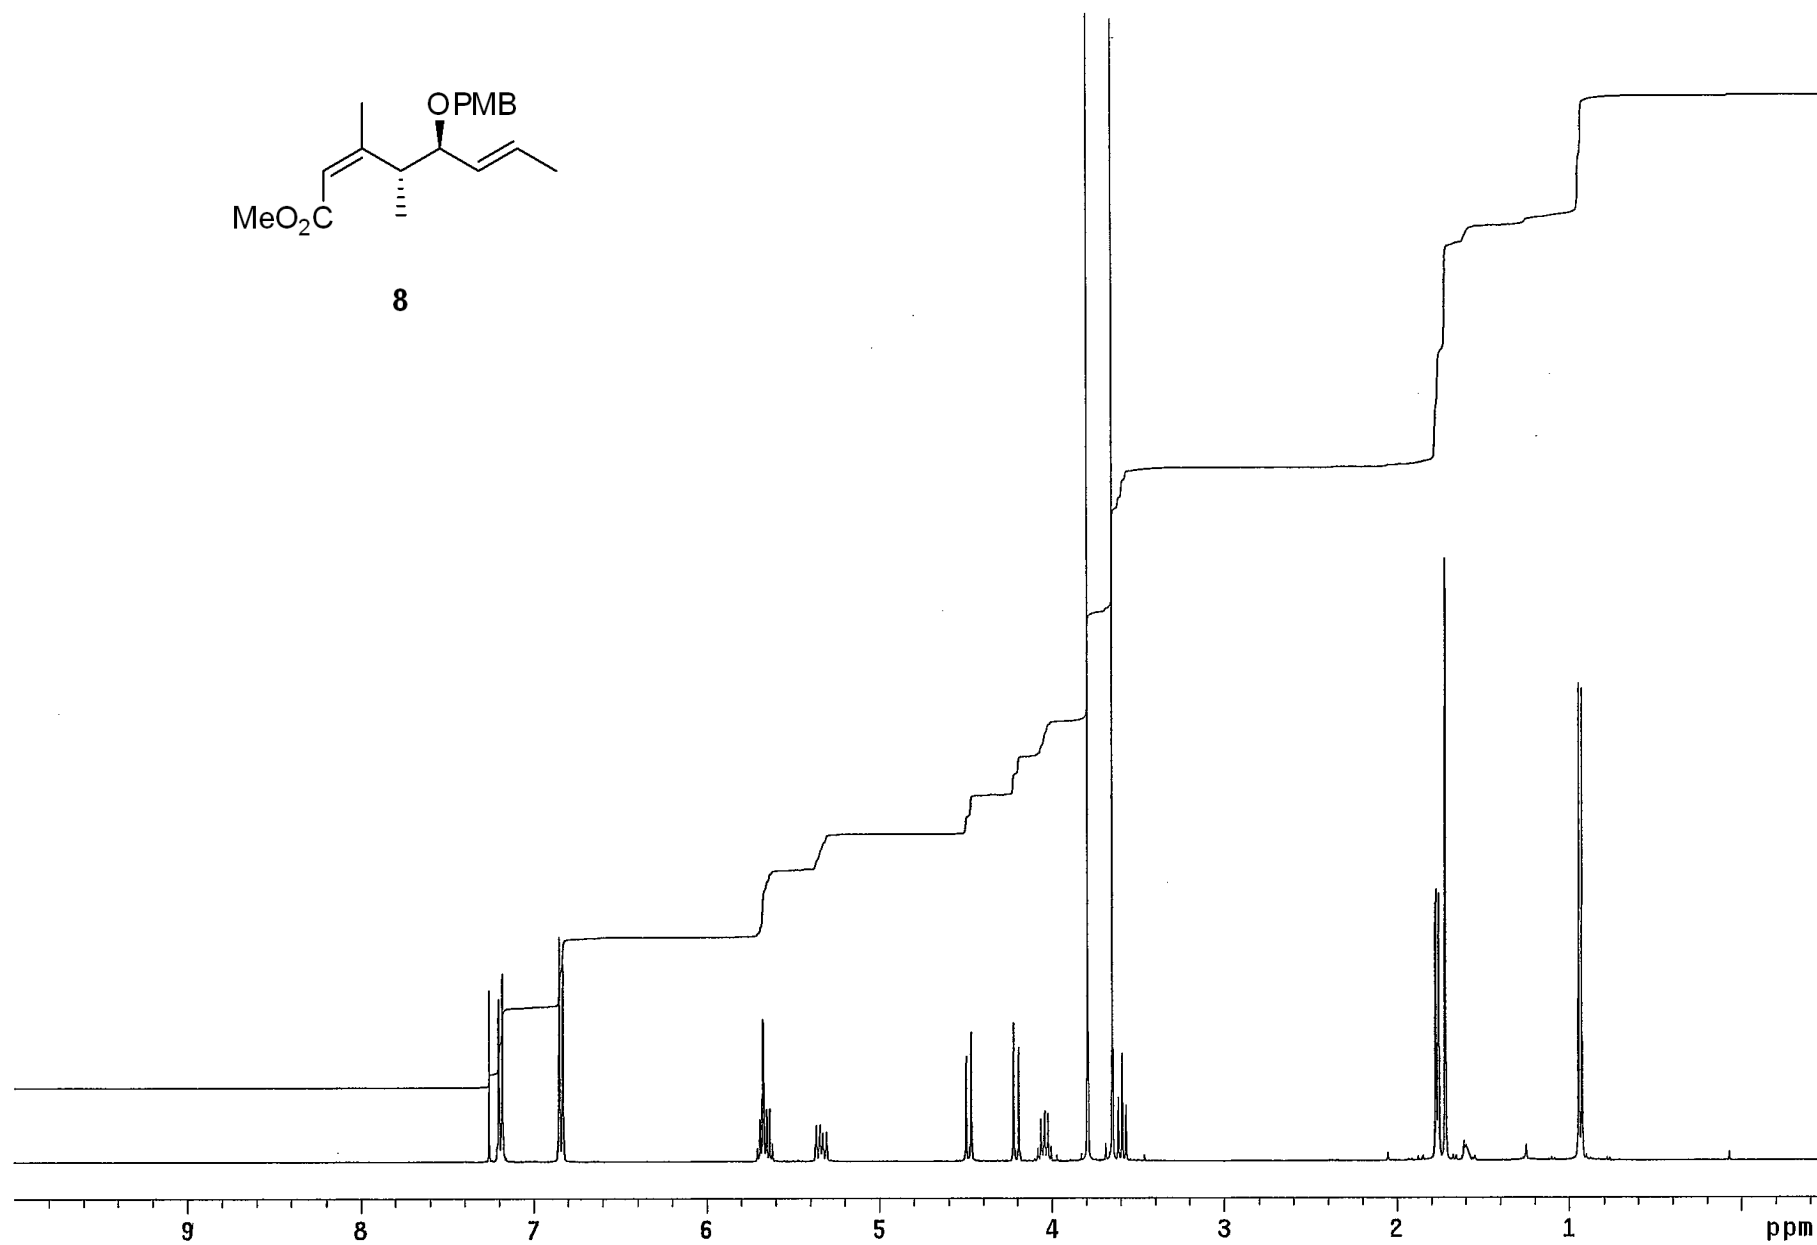

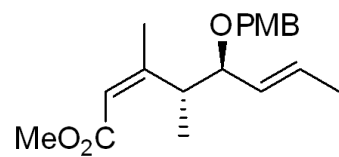

**8**

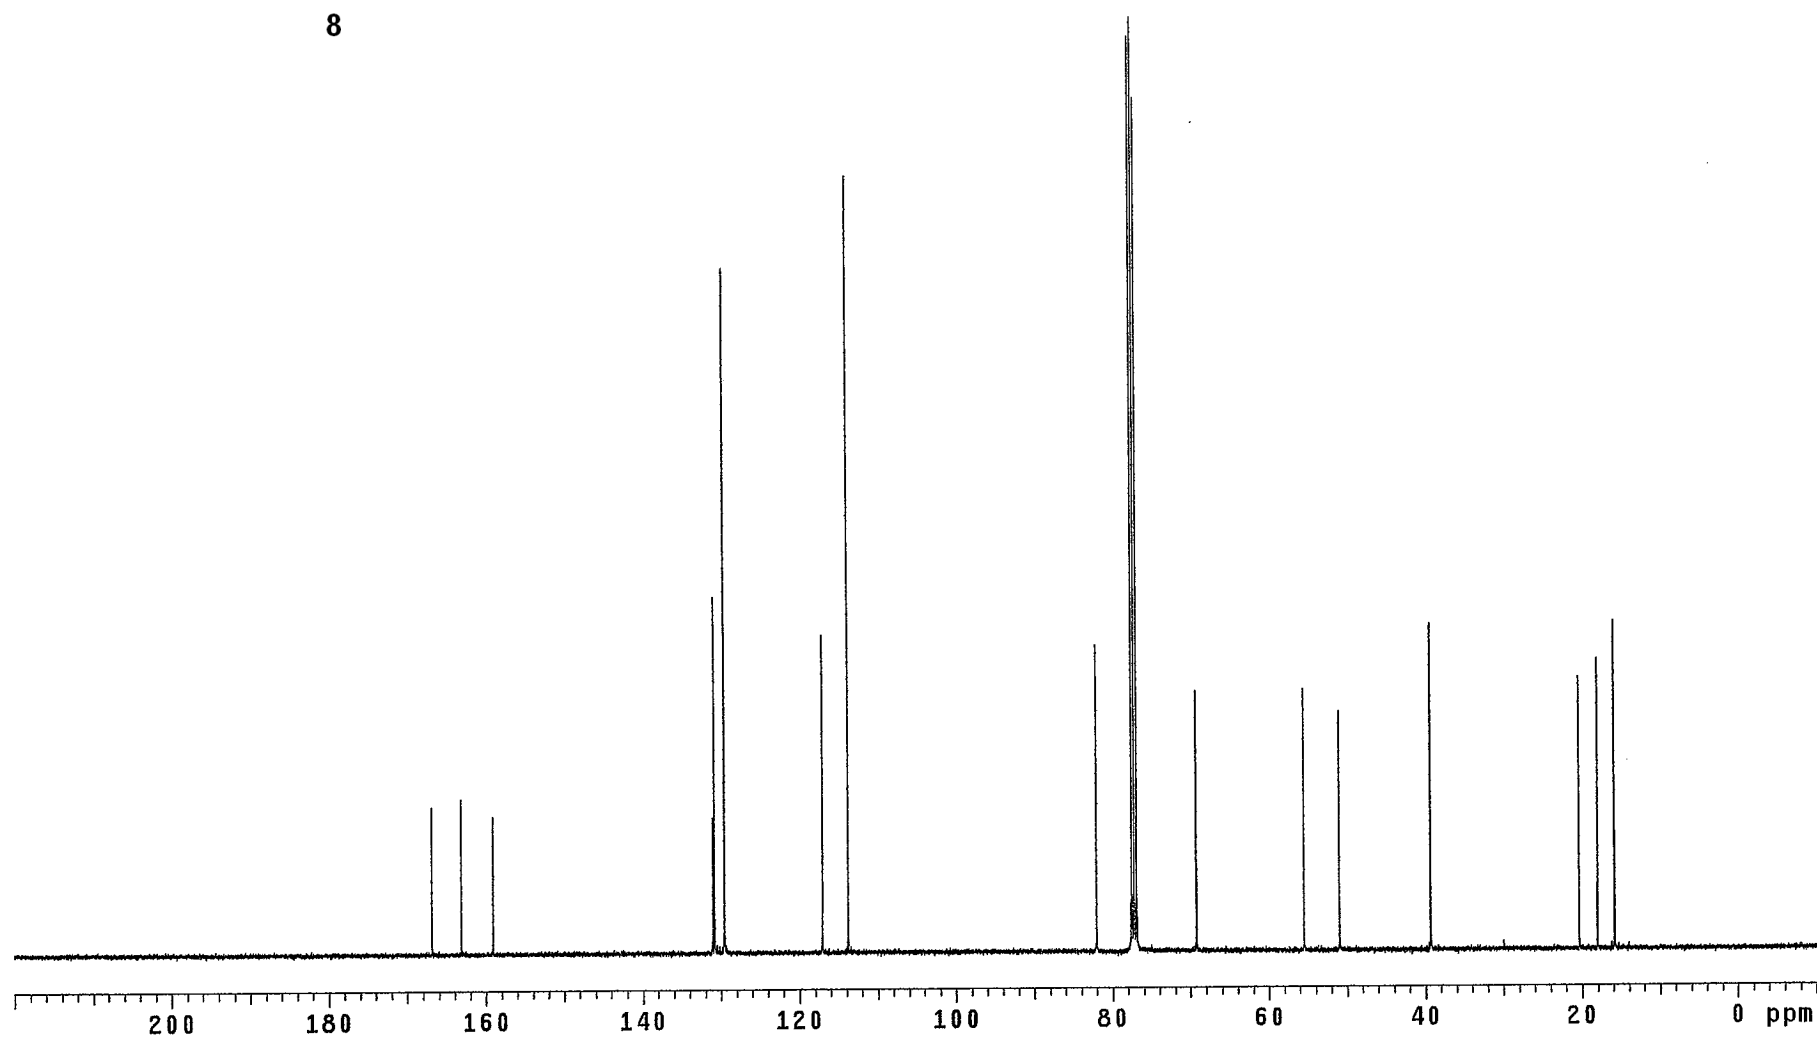



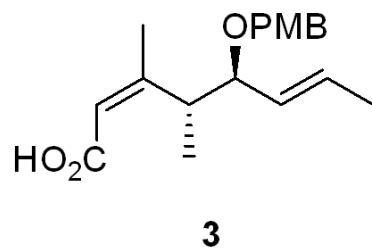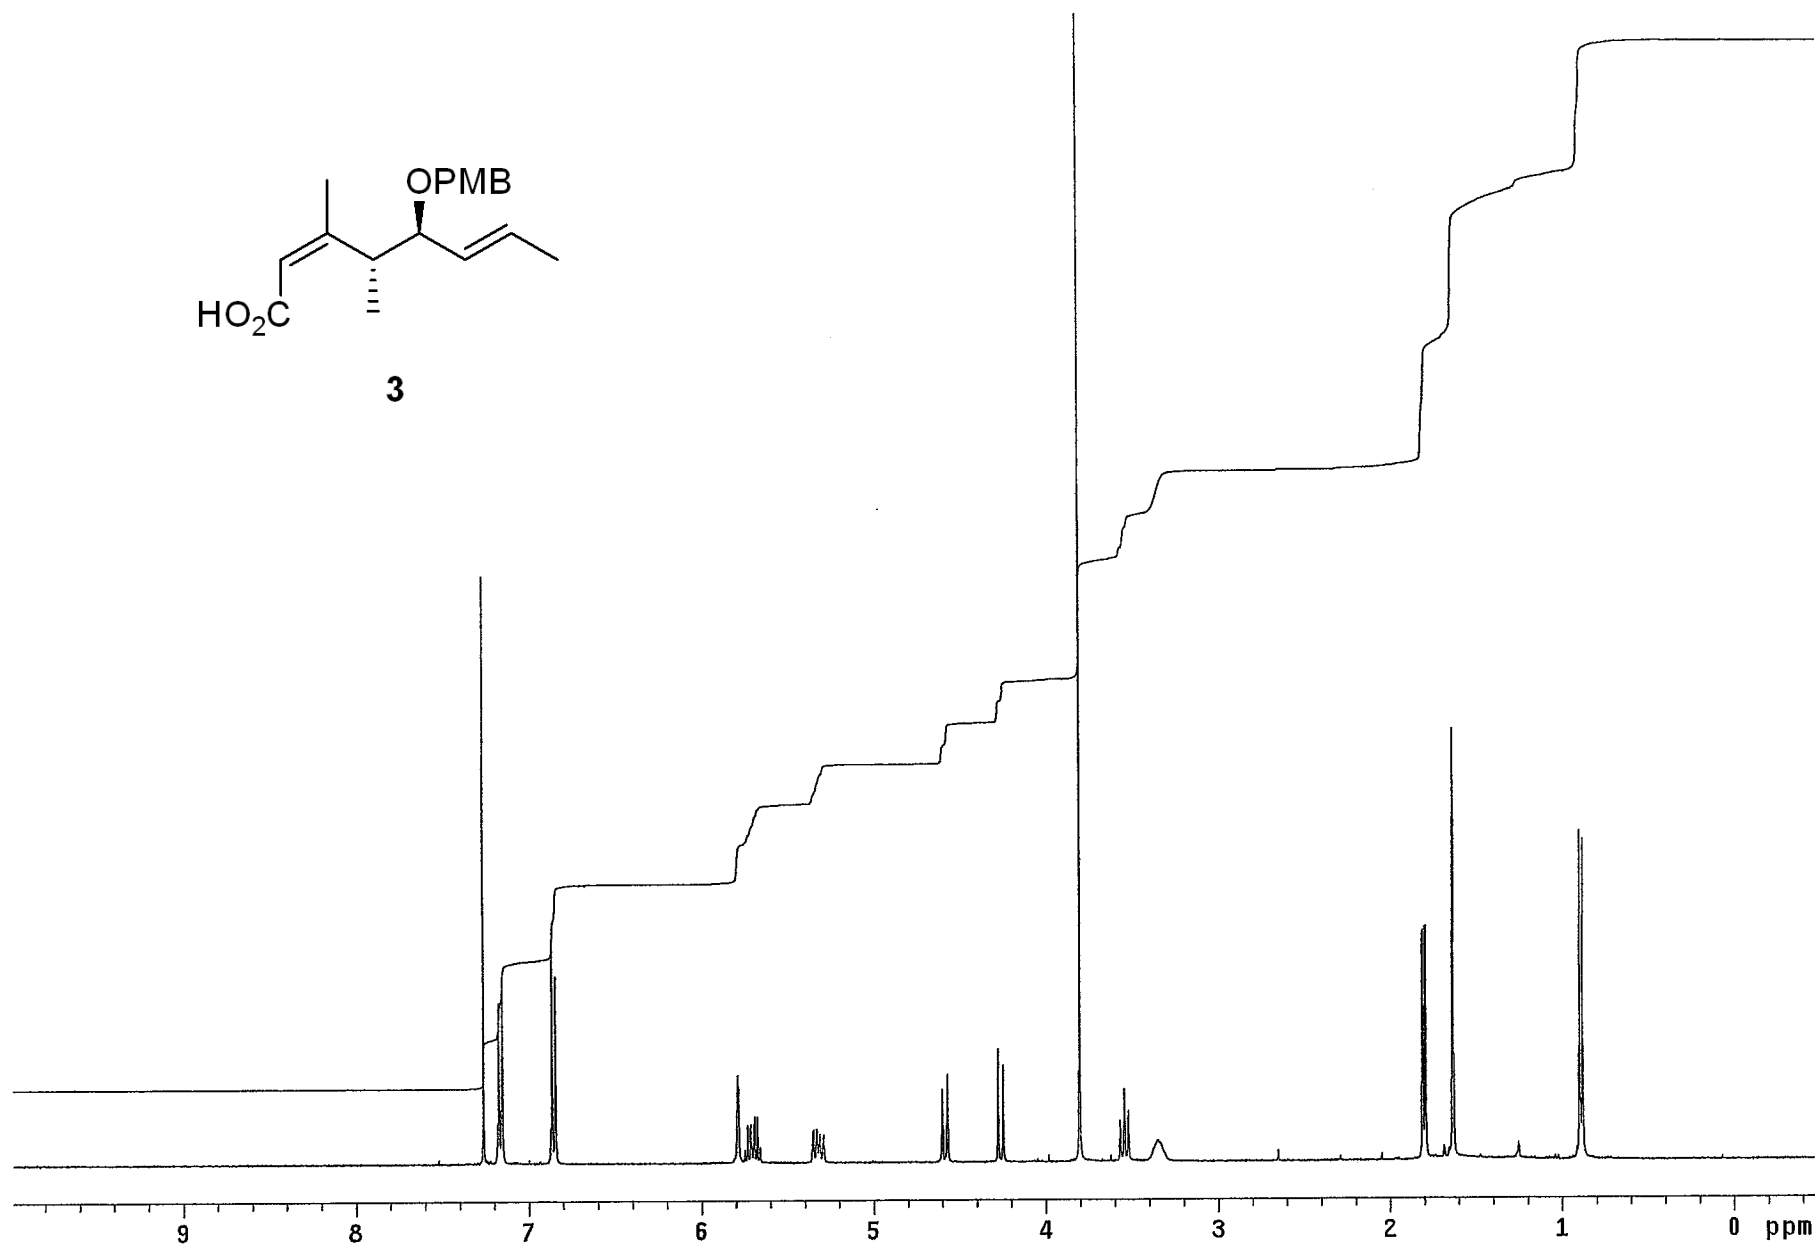

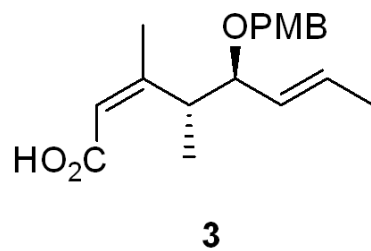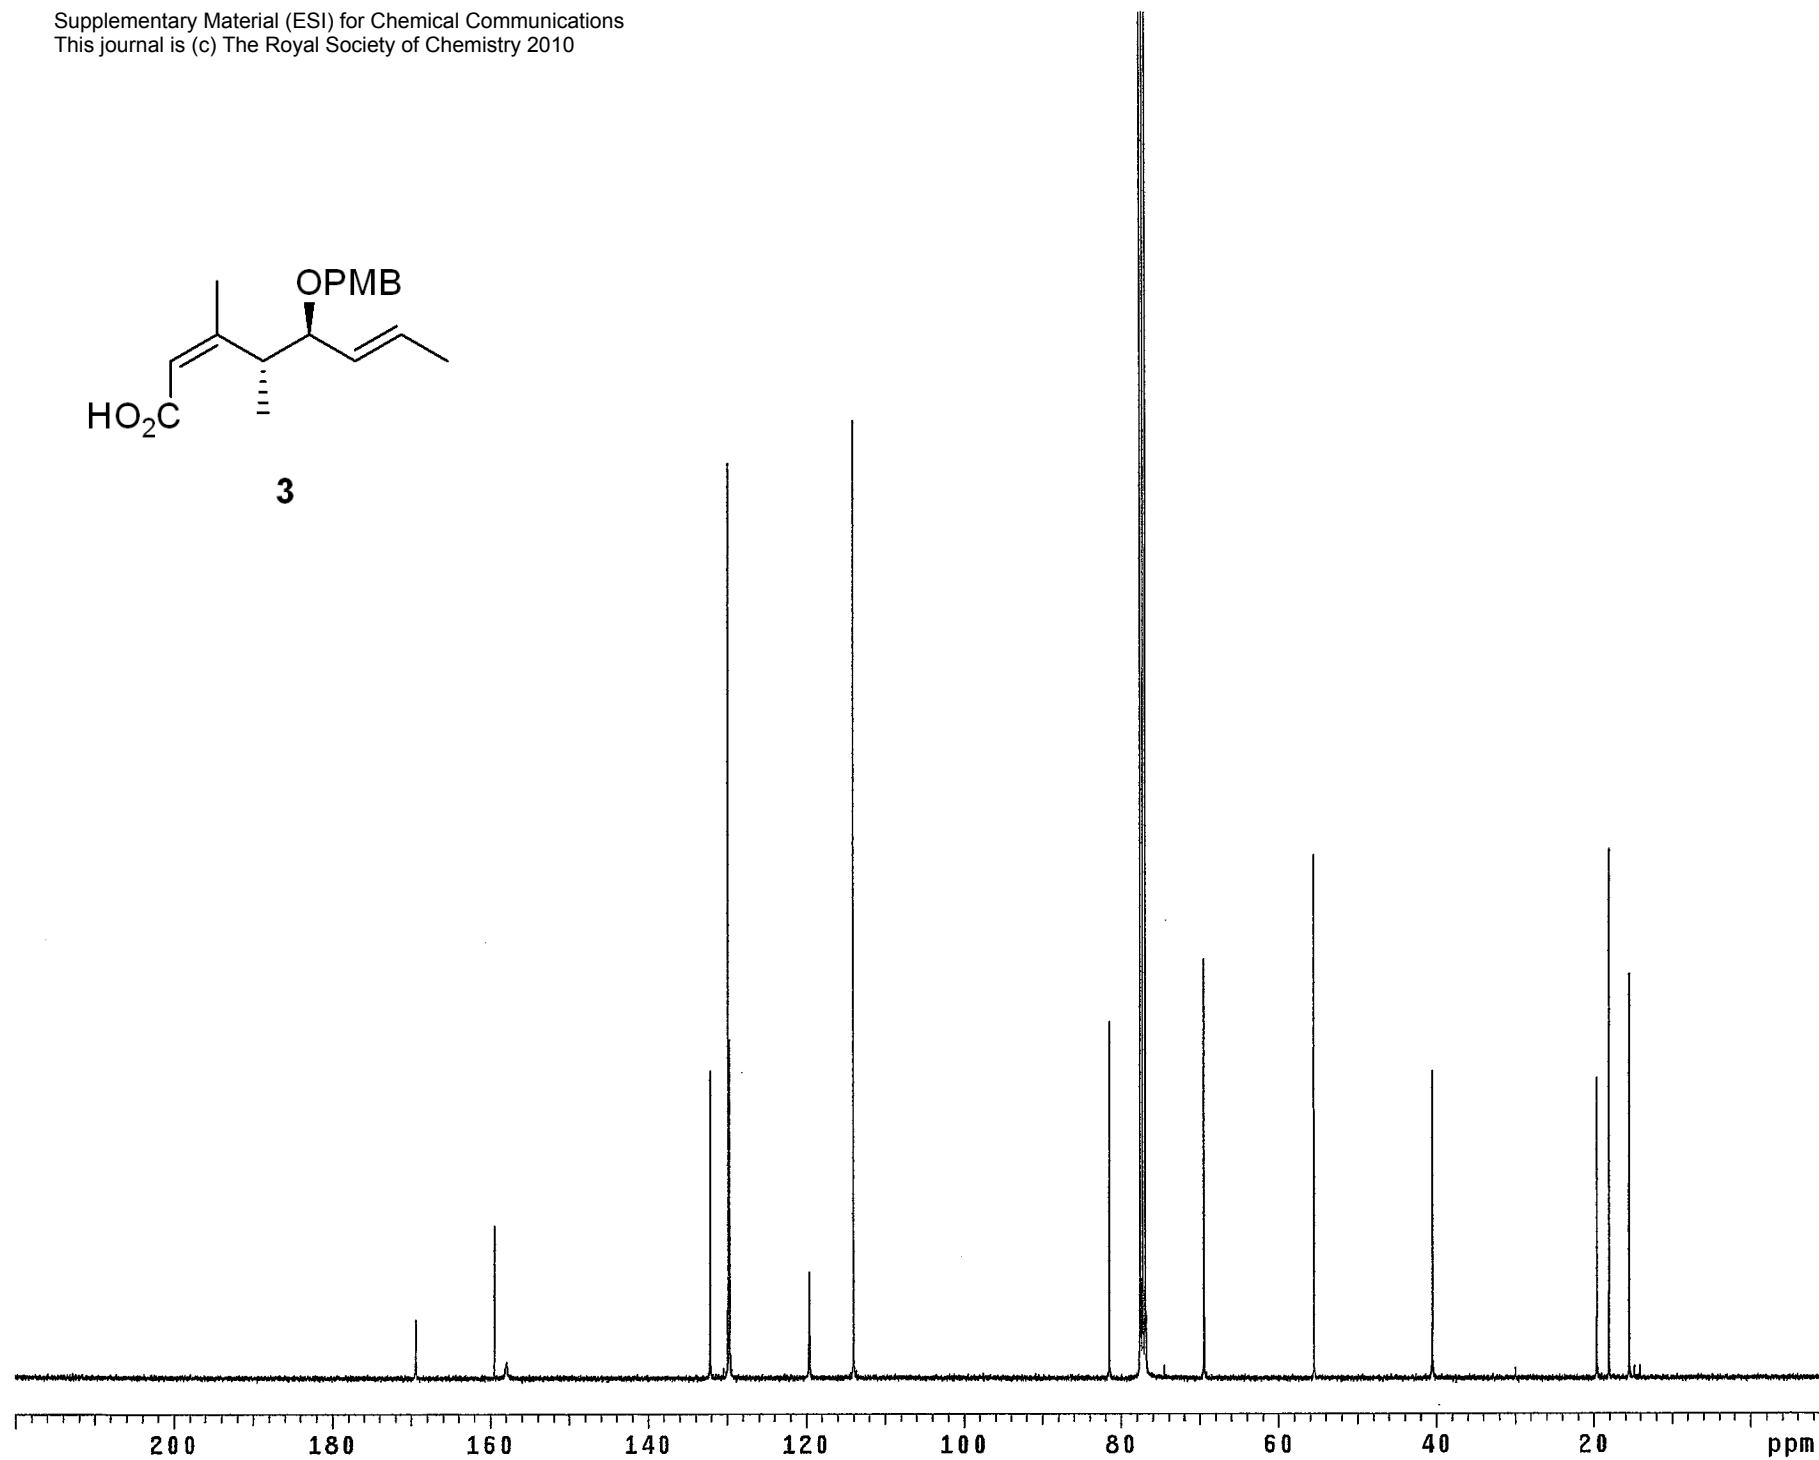

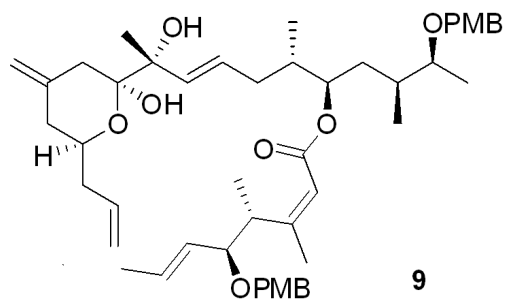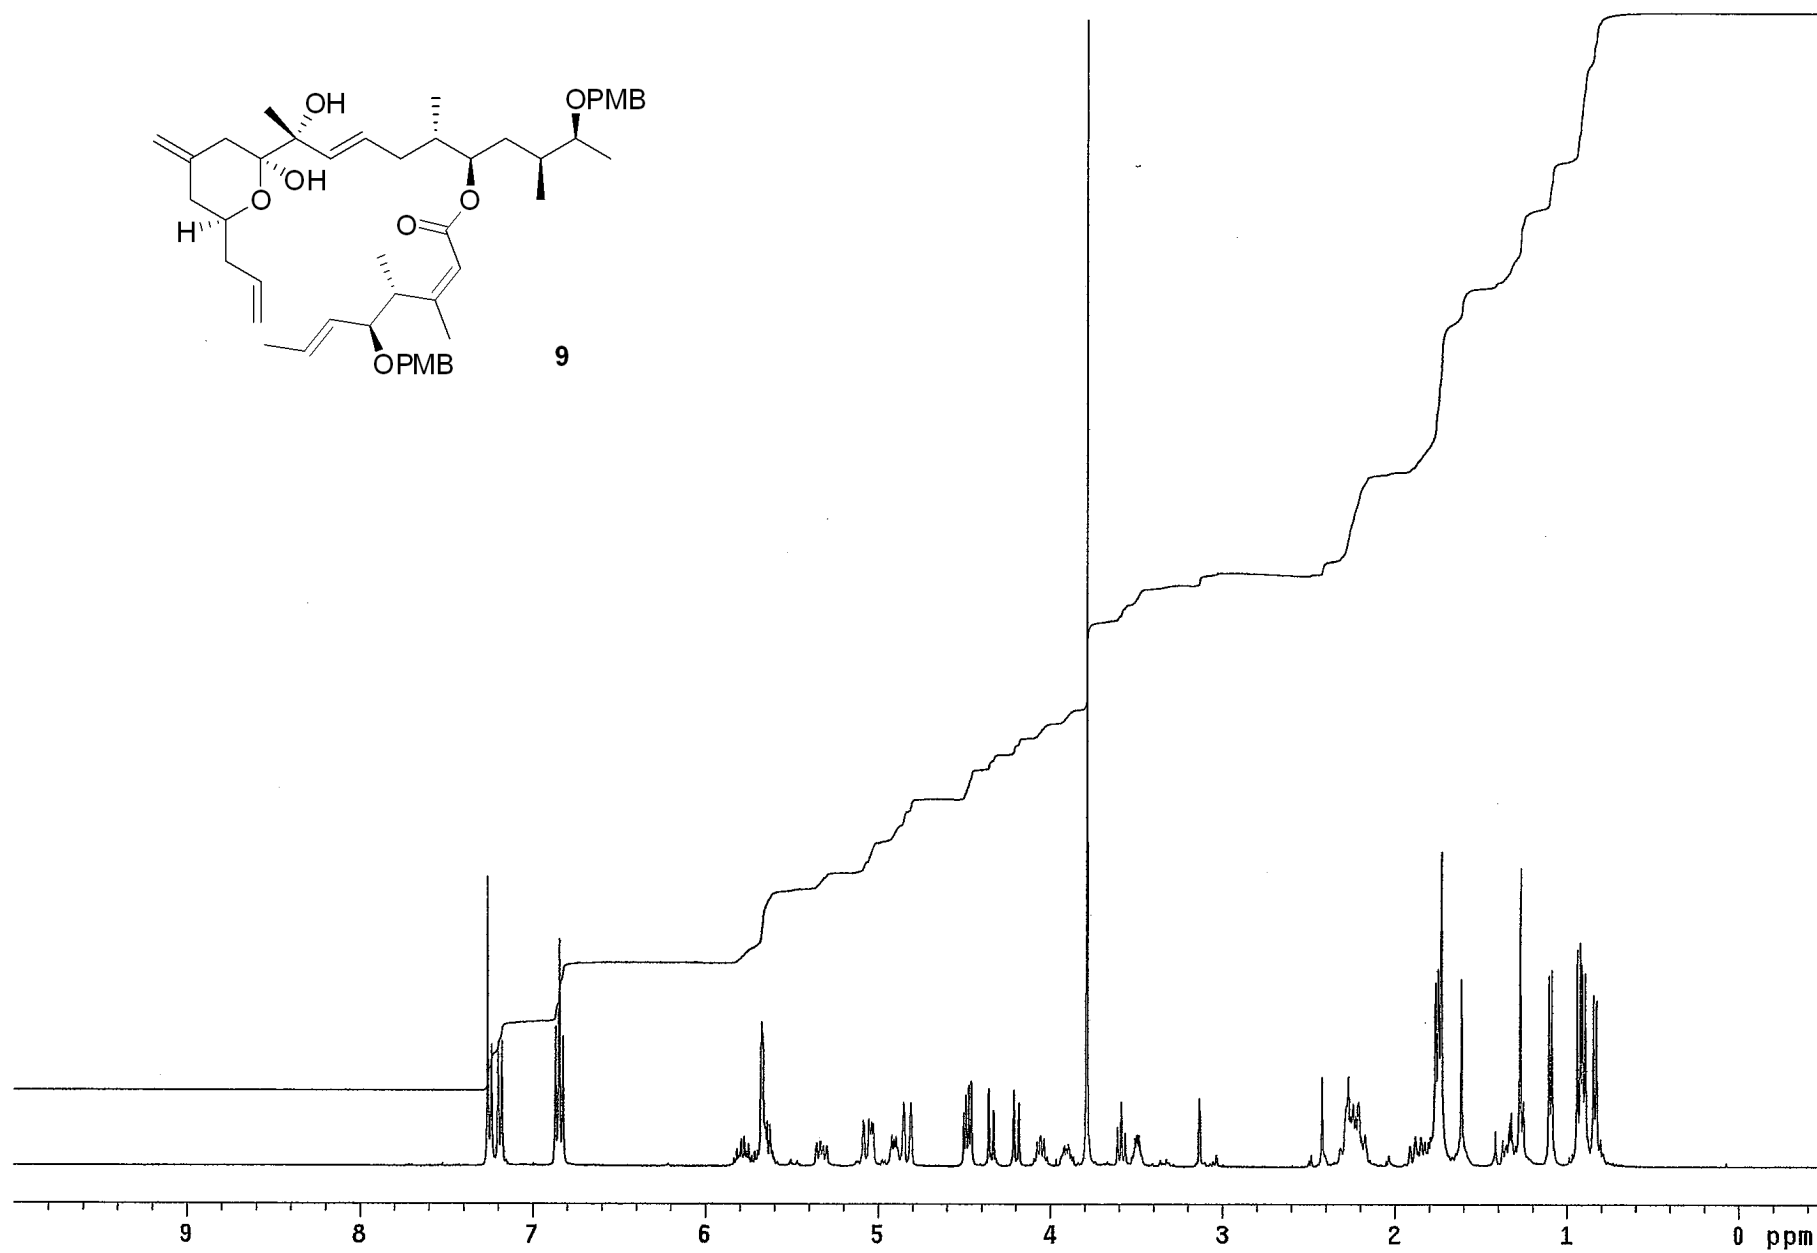

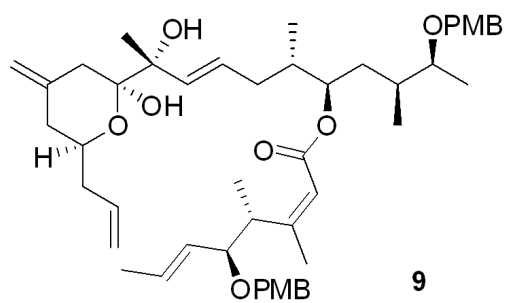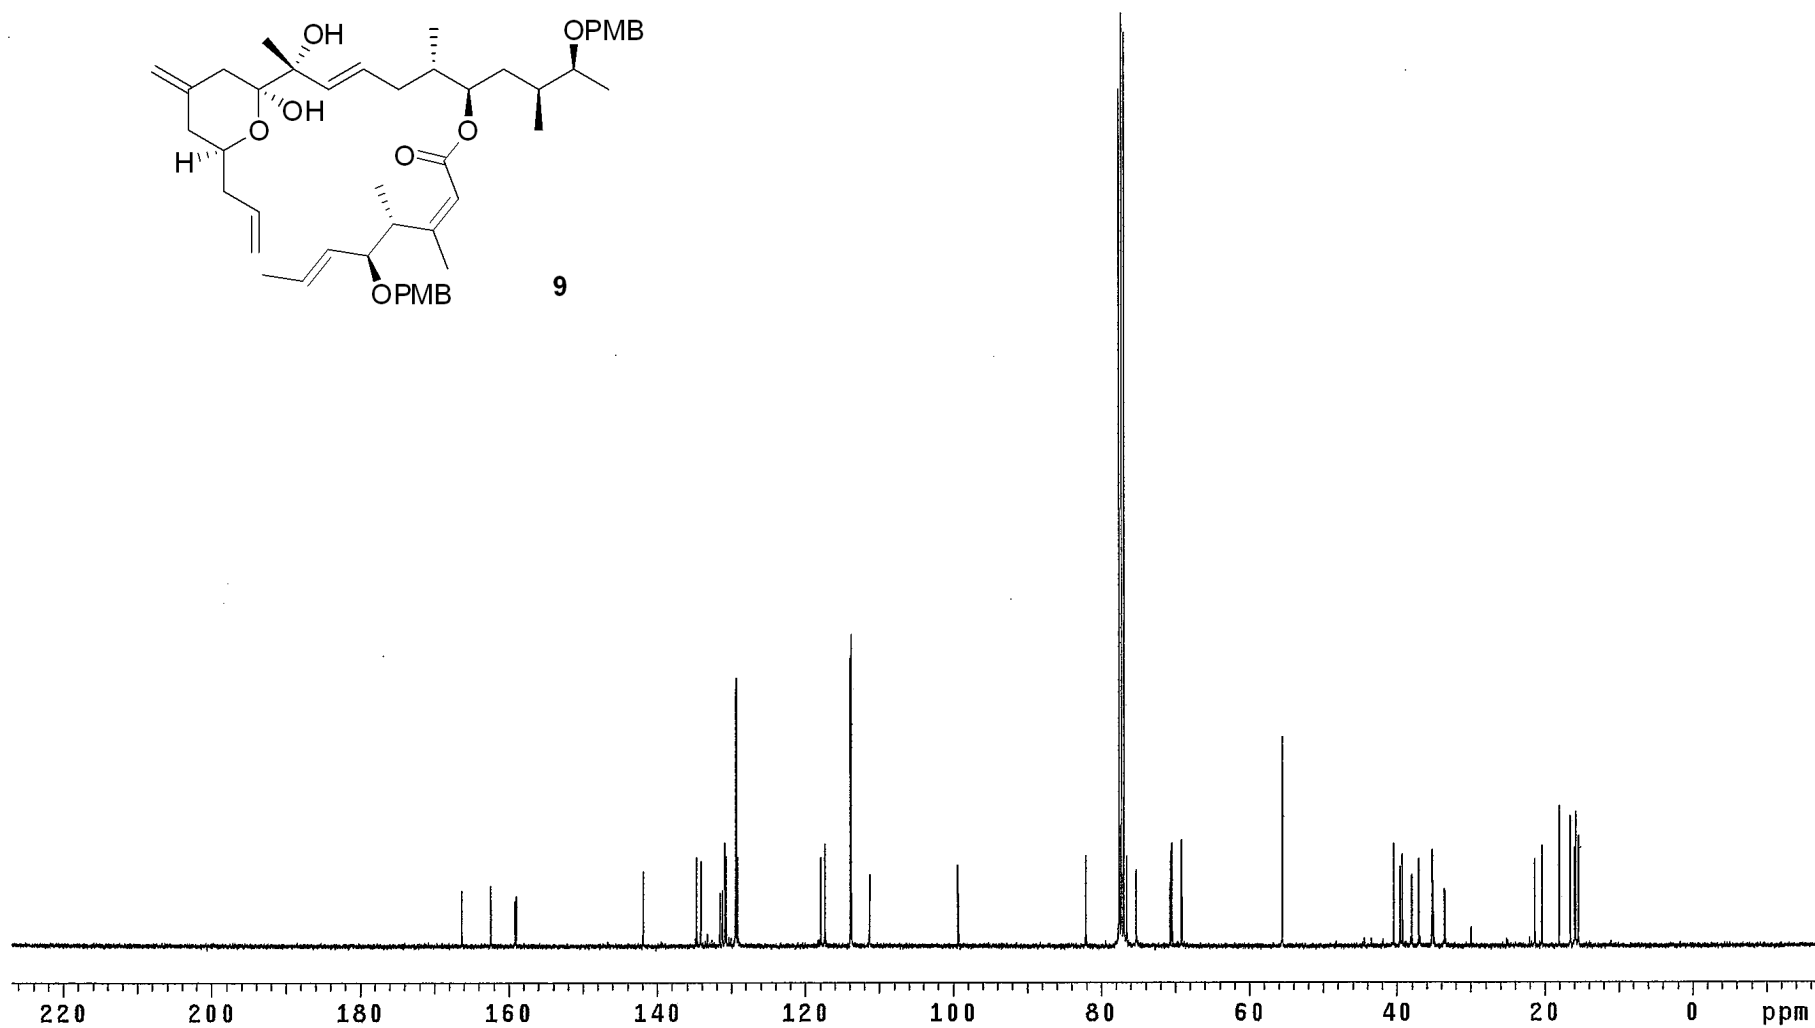

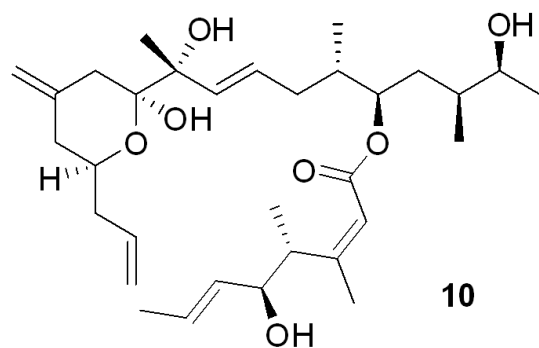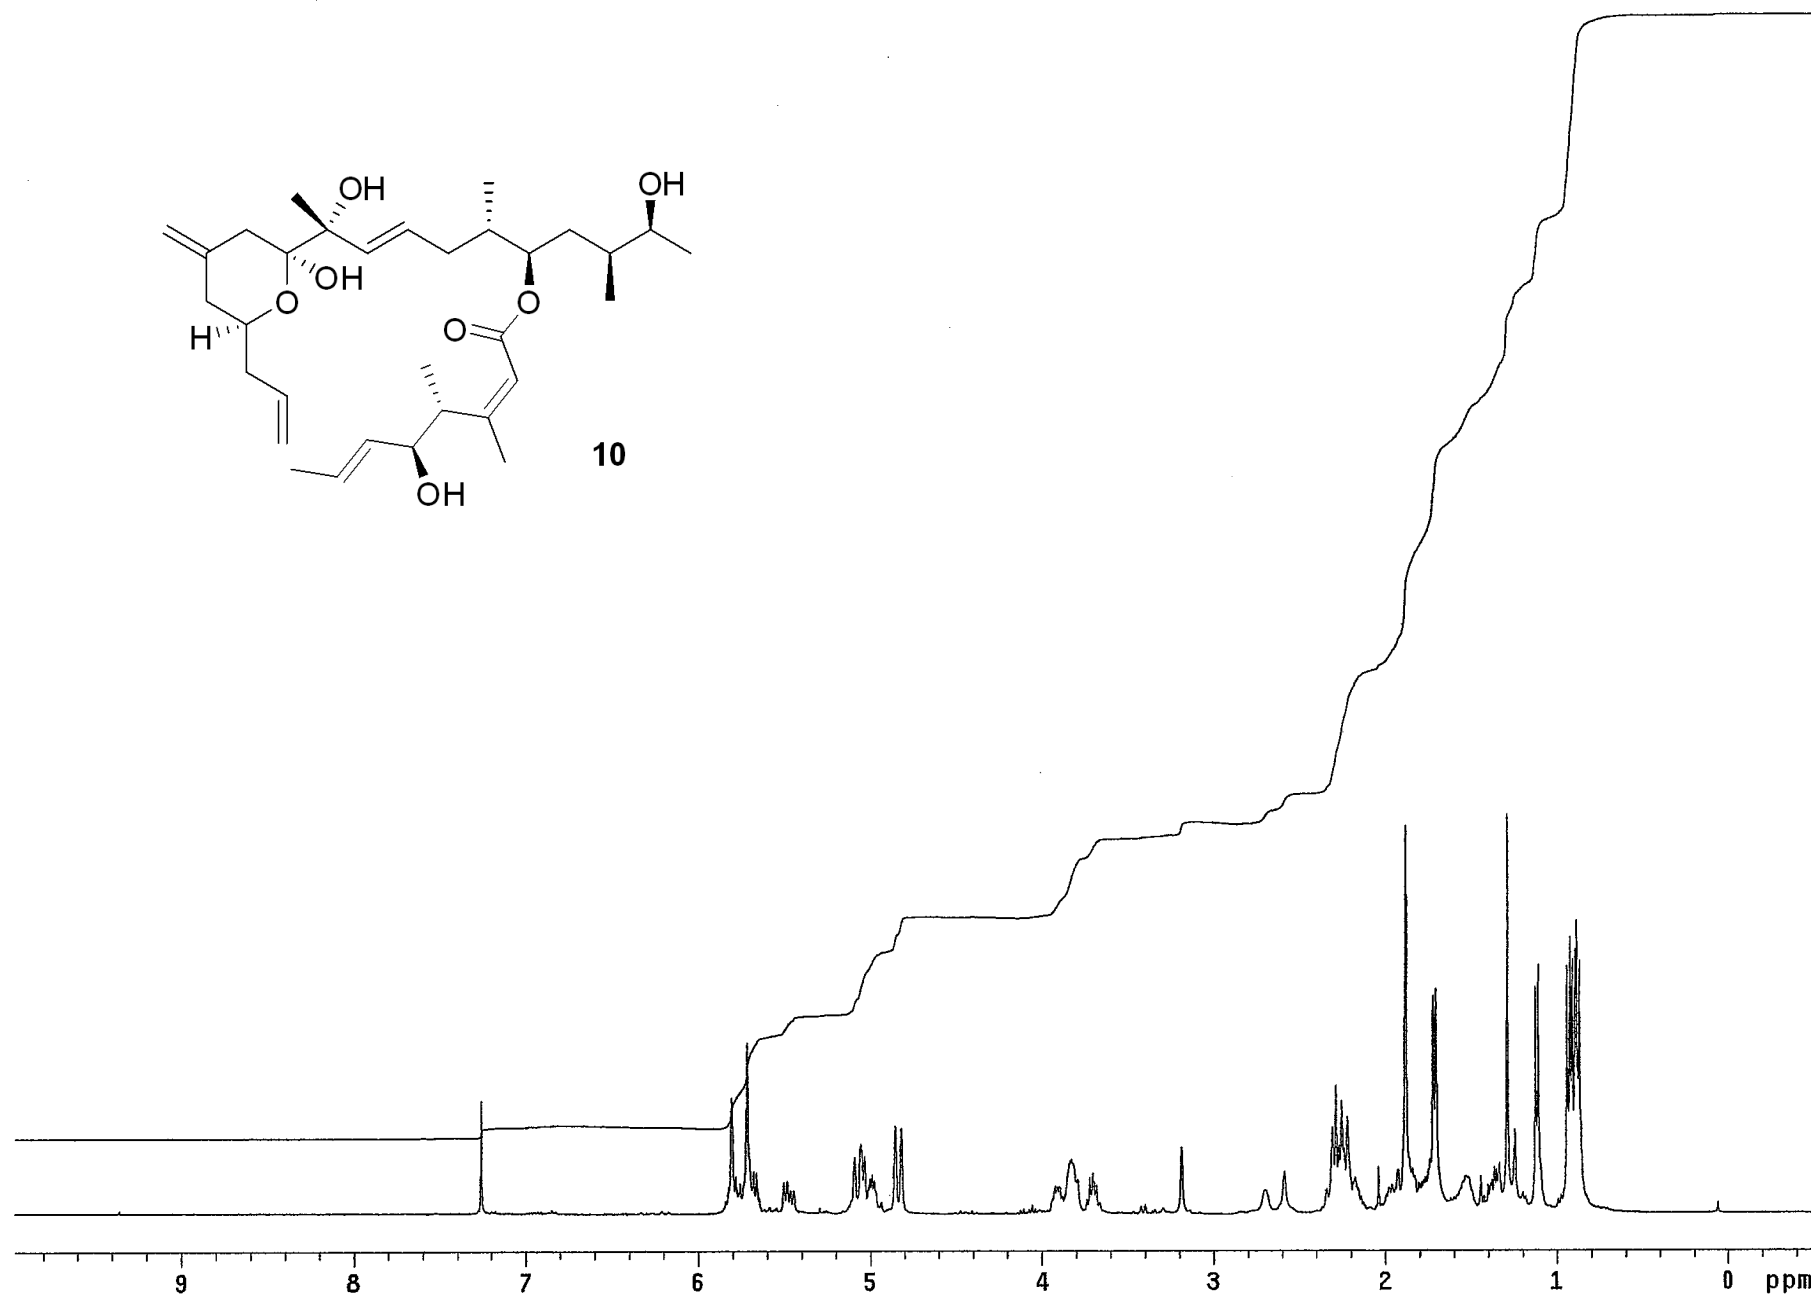

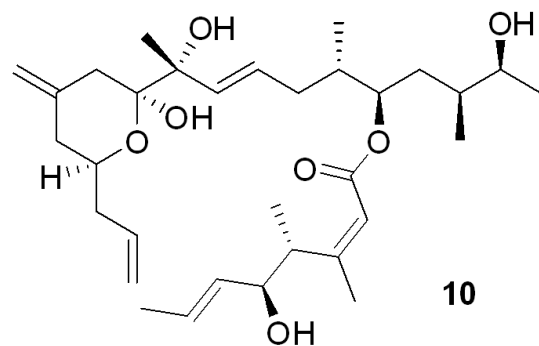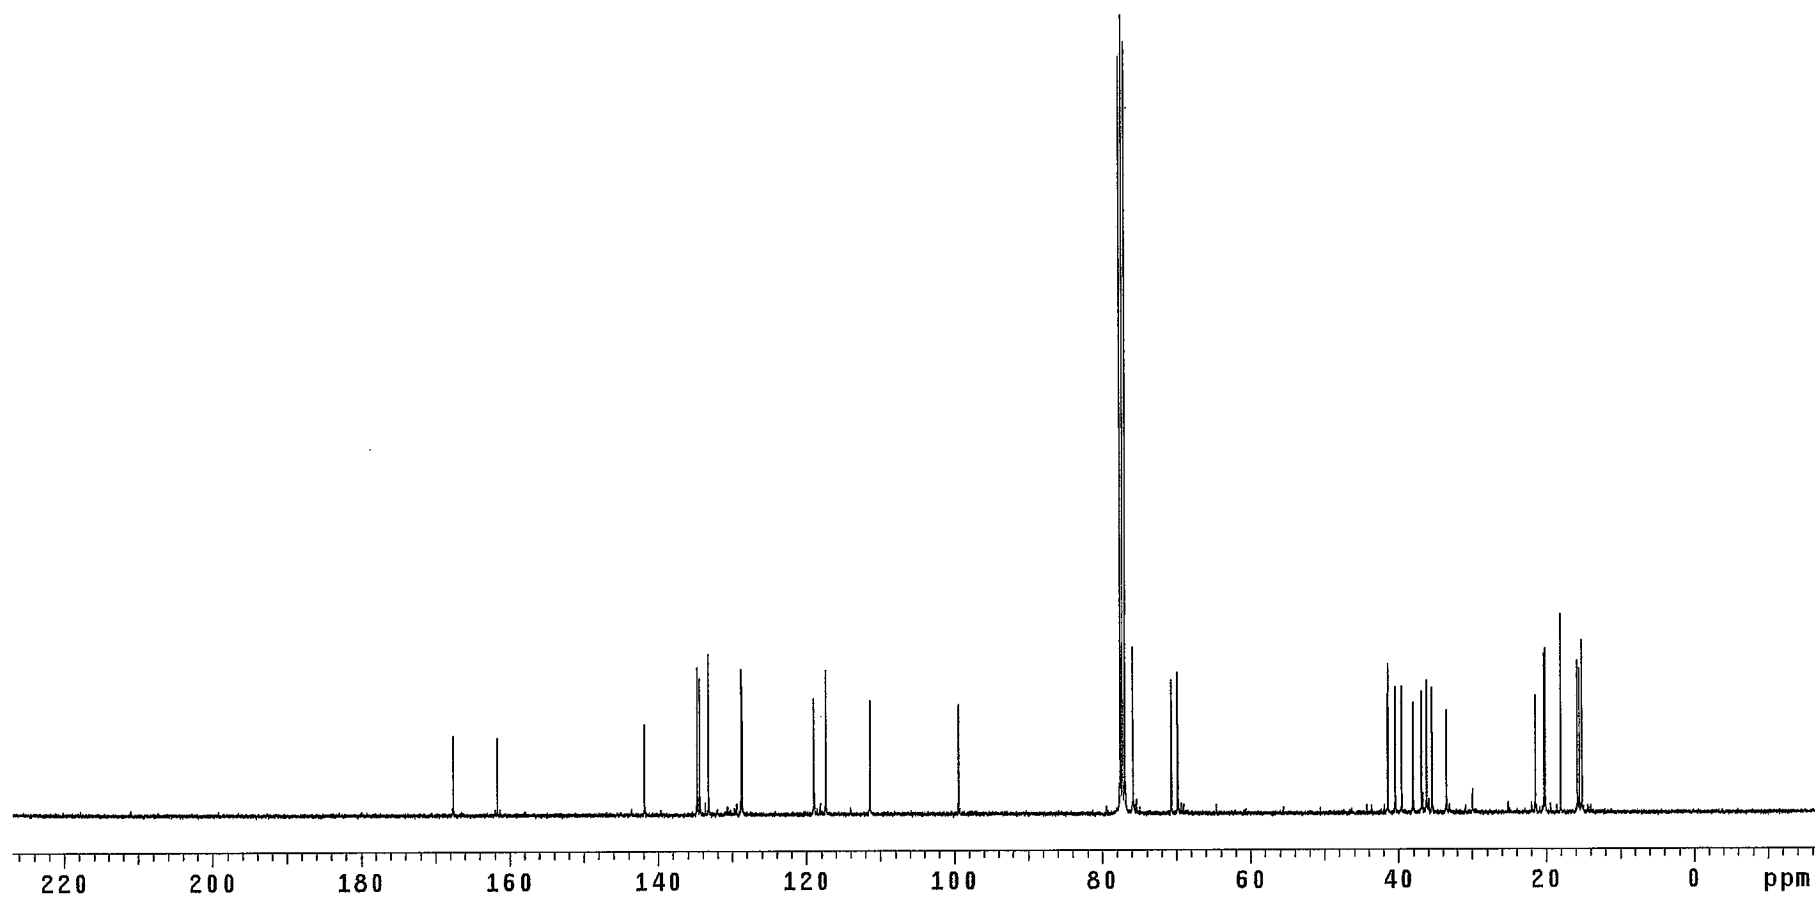

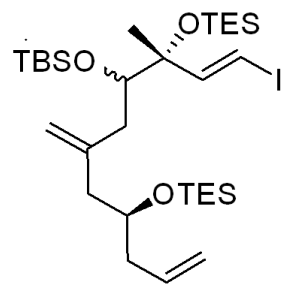

12

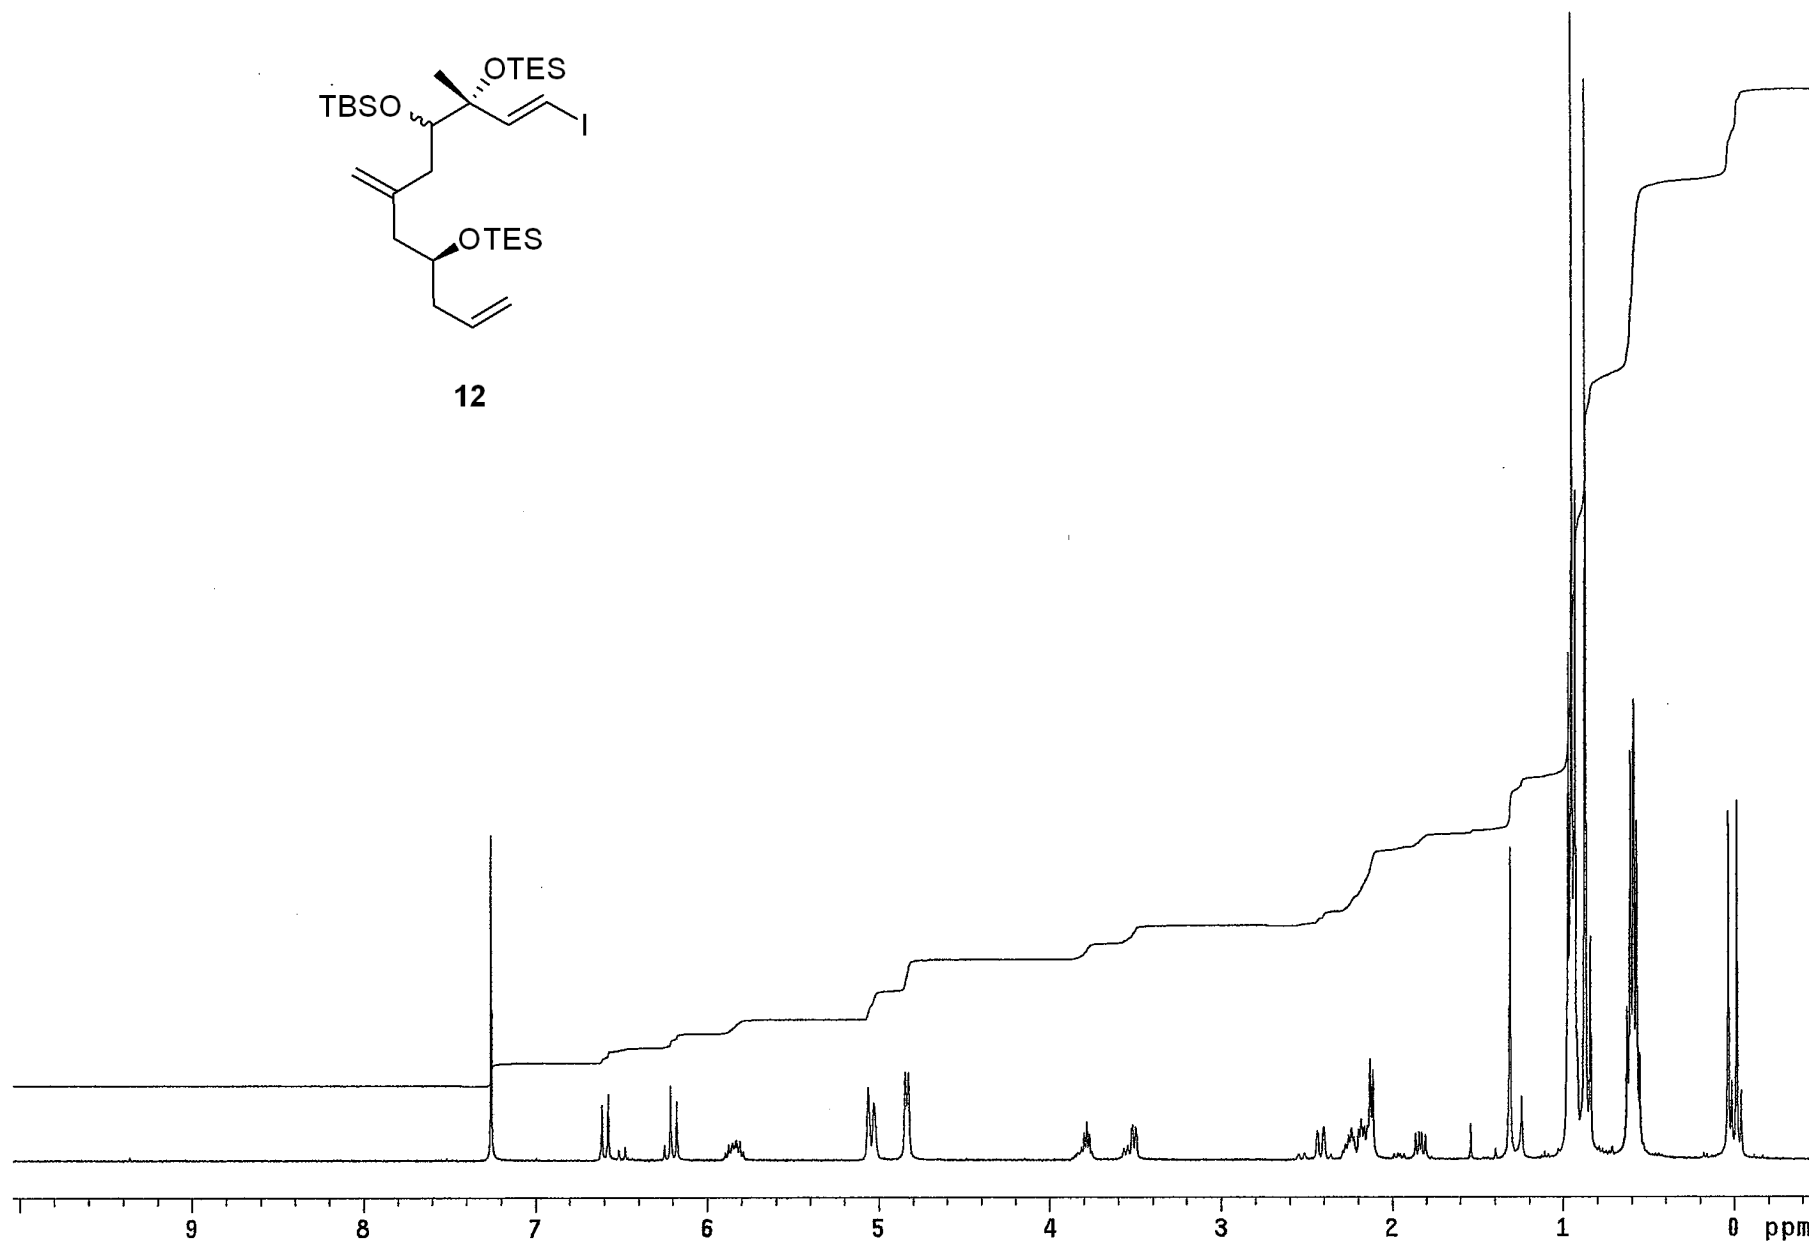

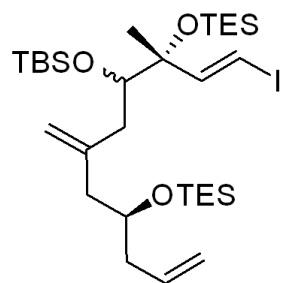

12

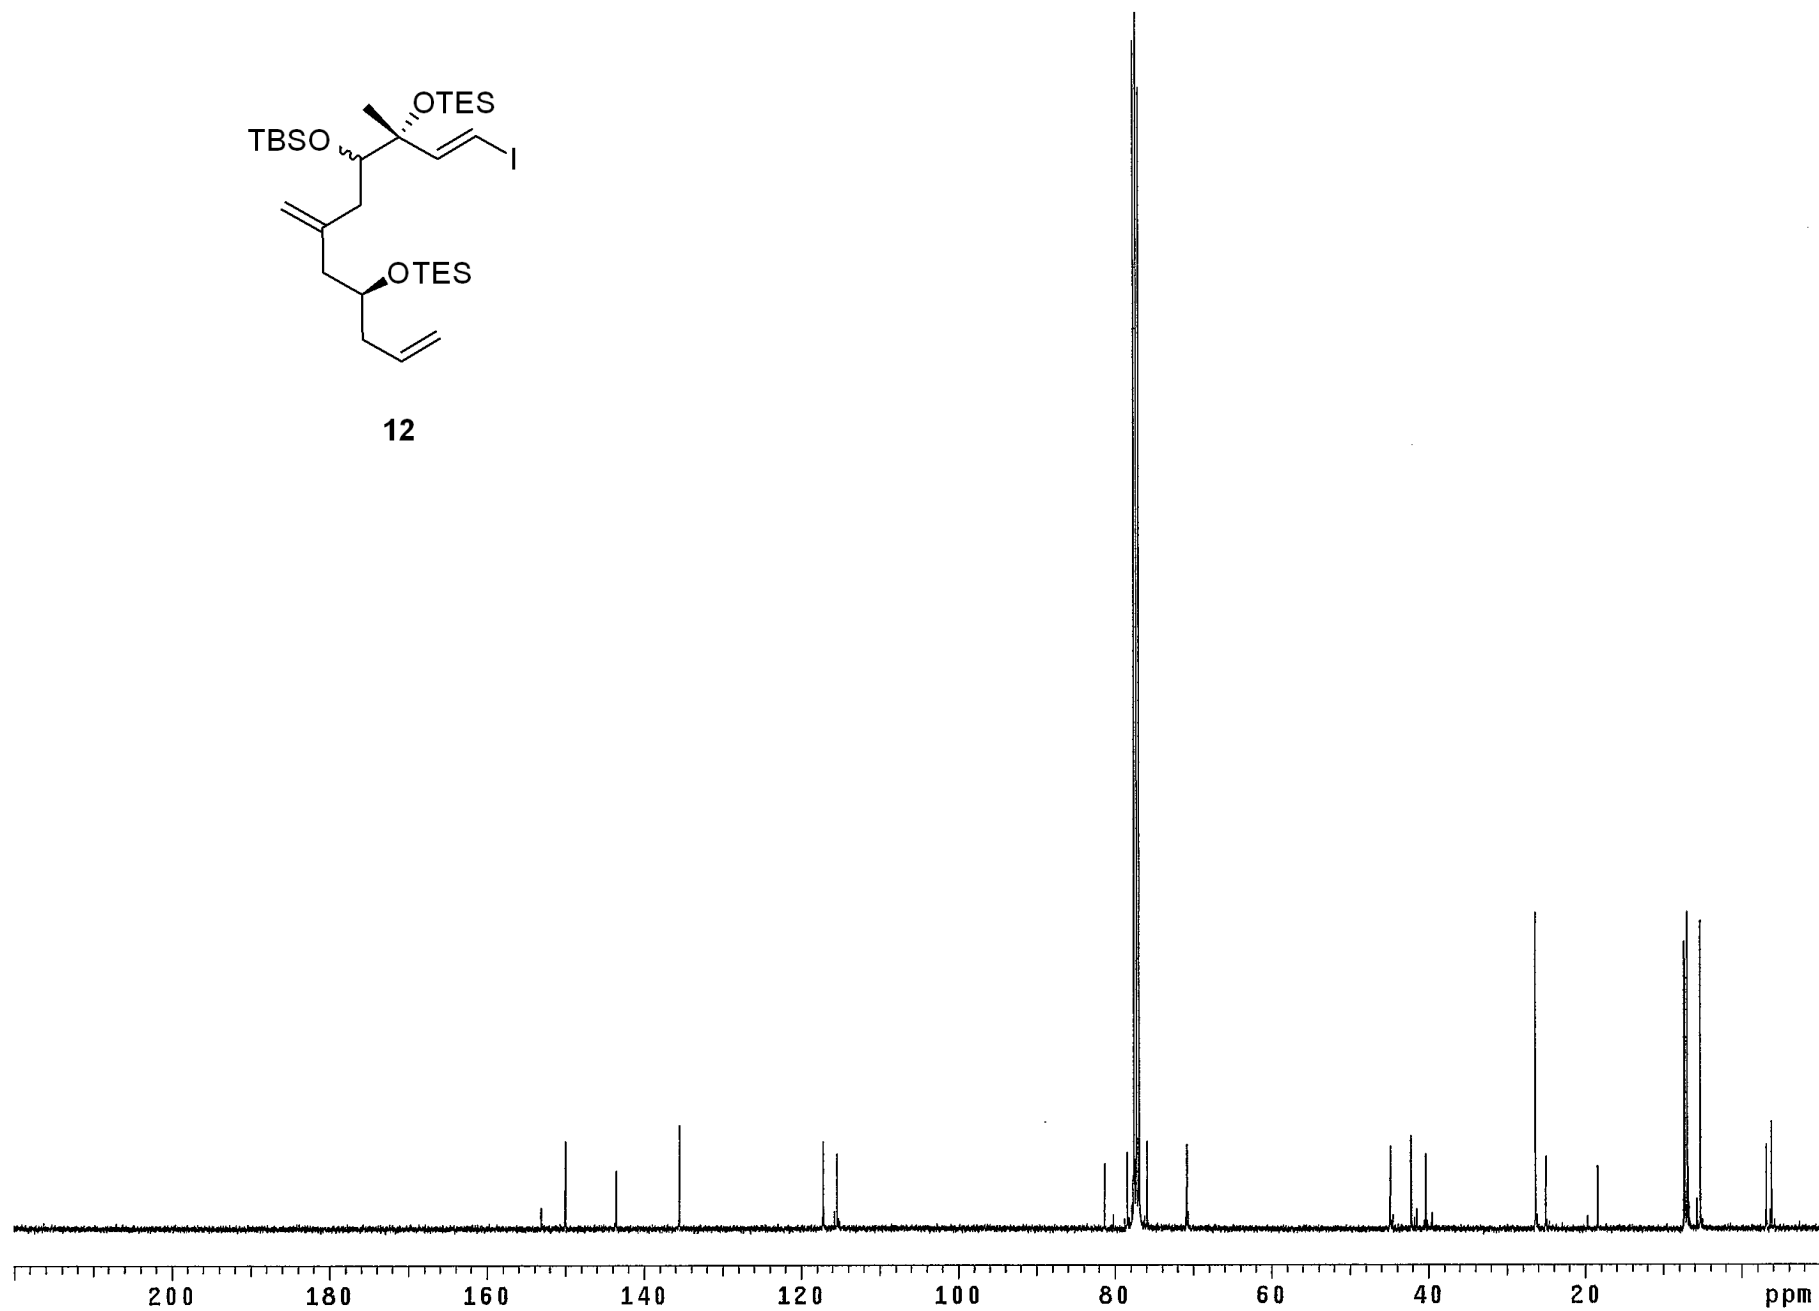



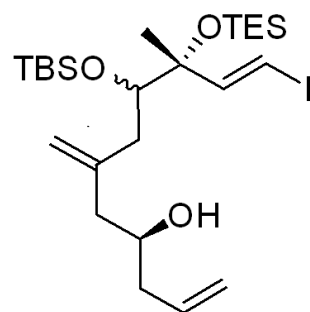

**13**

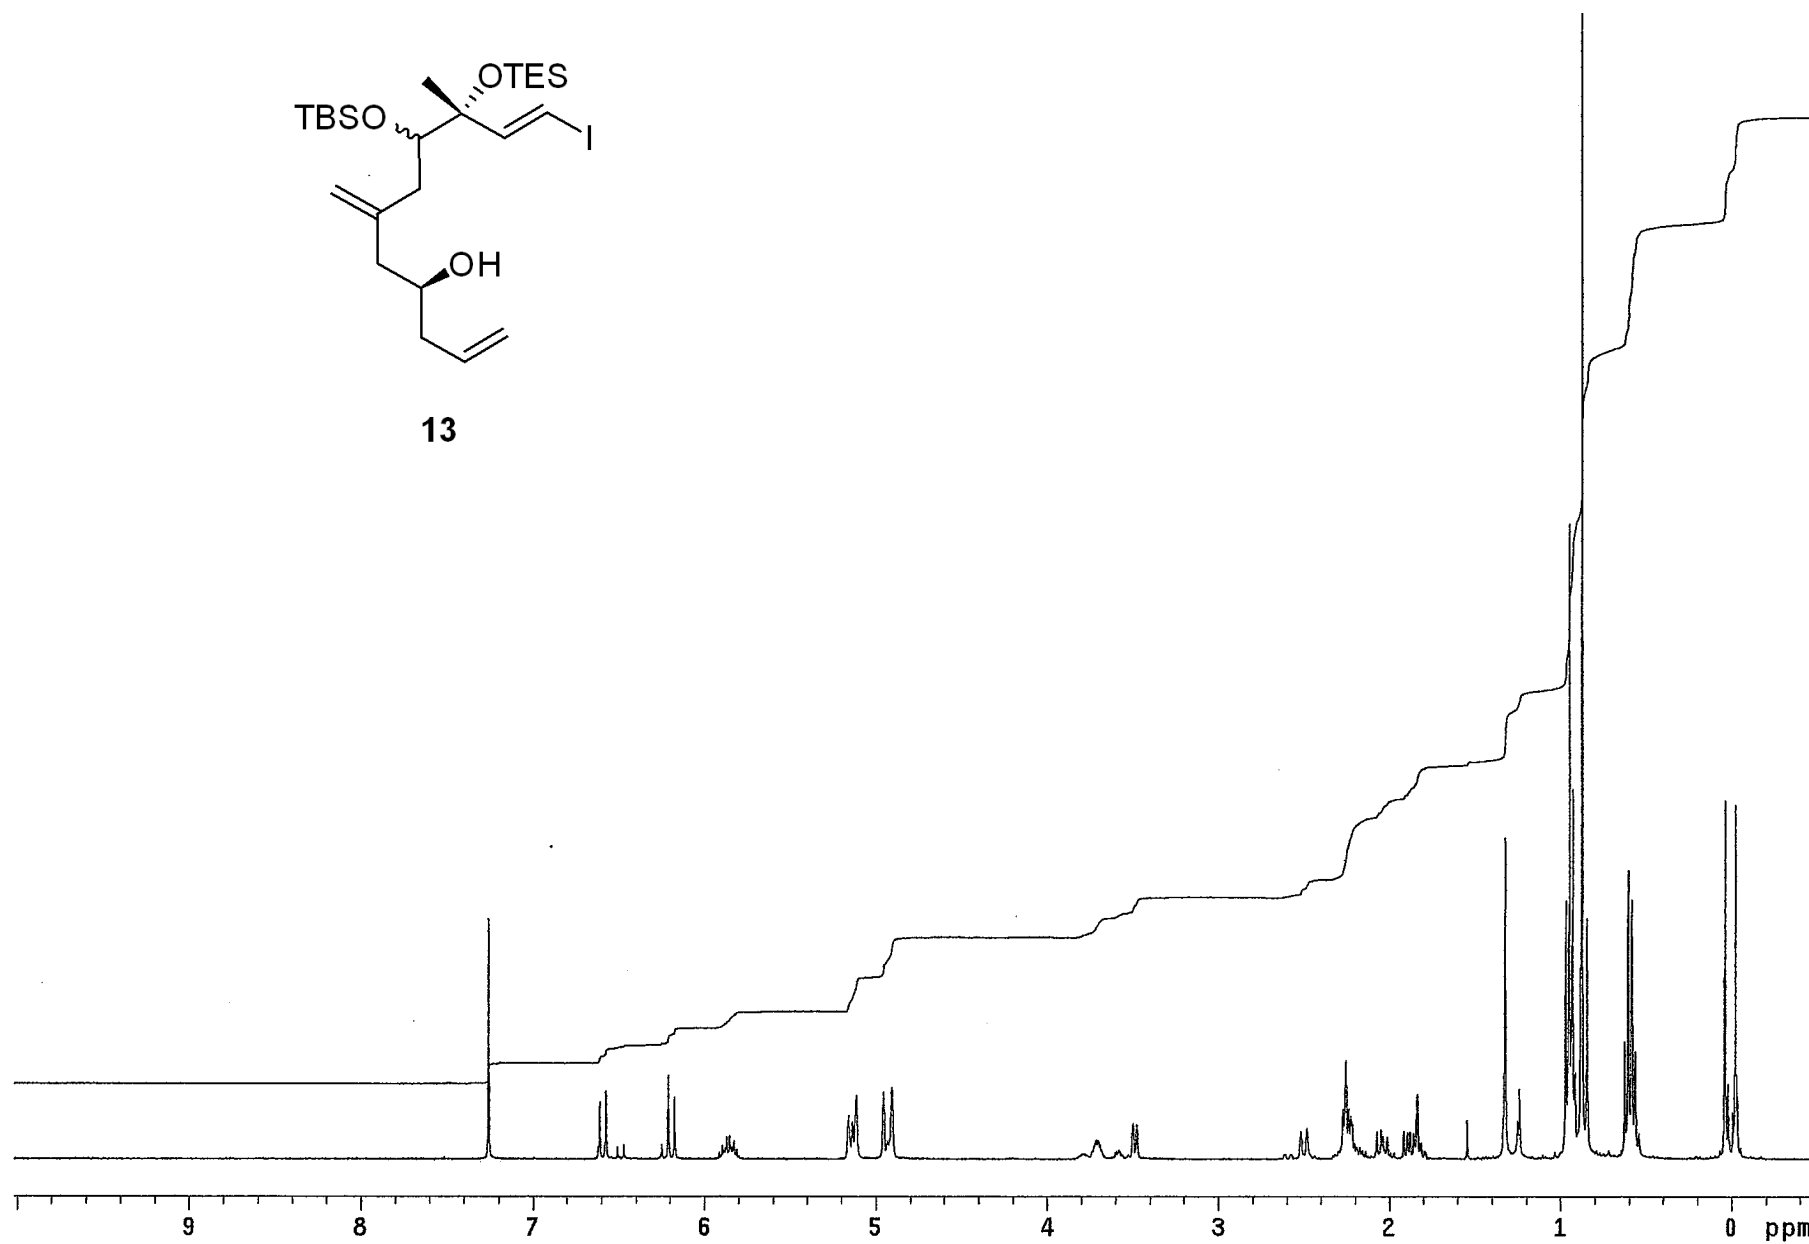

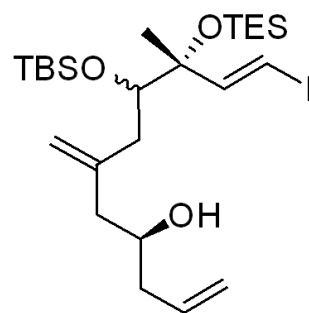

13

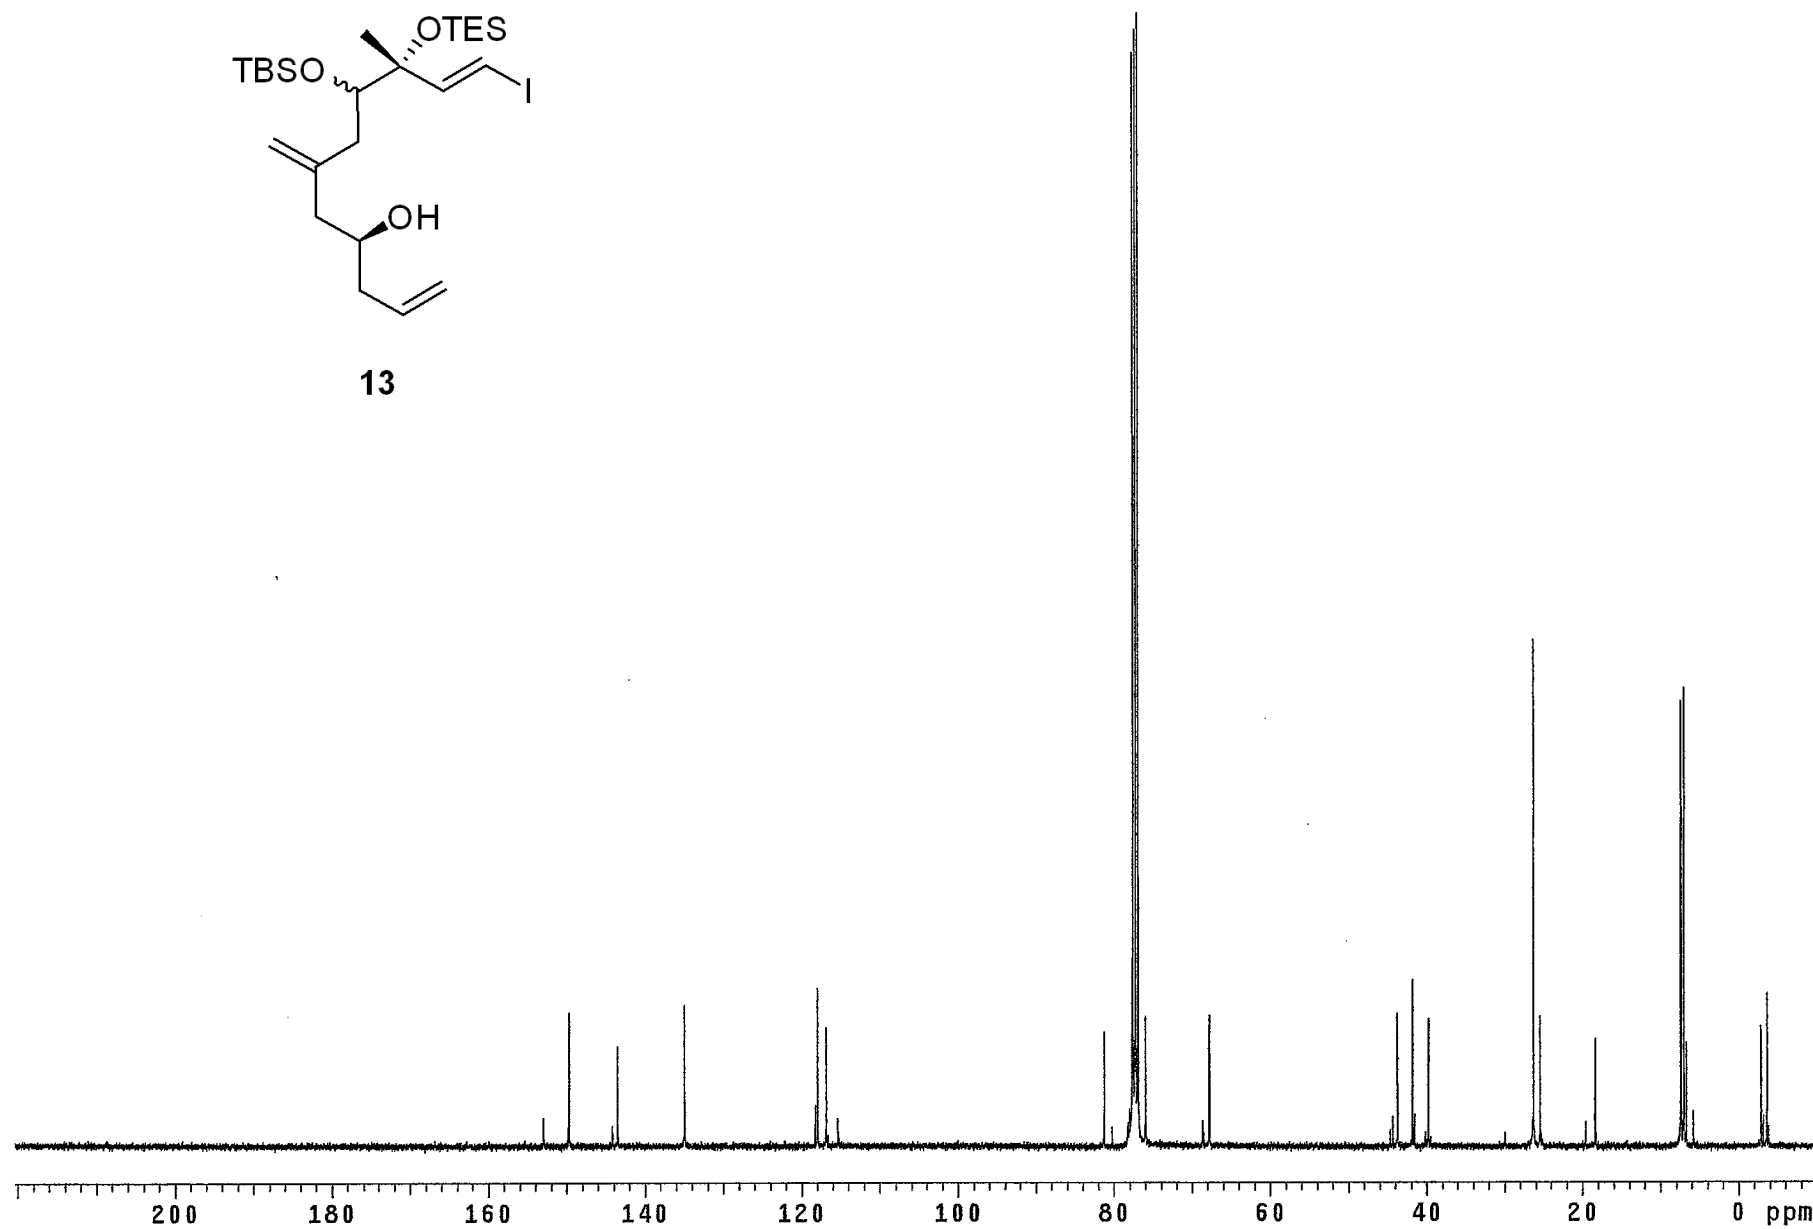

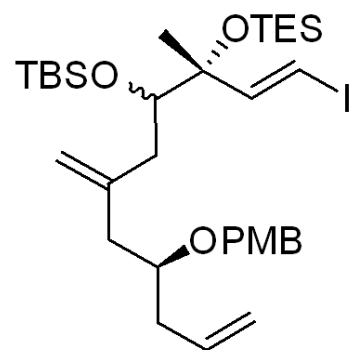

**14**

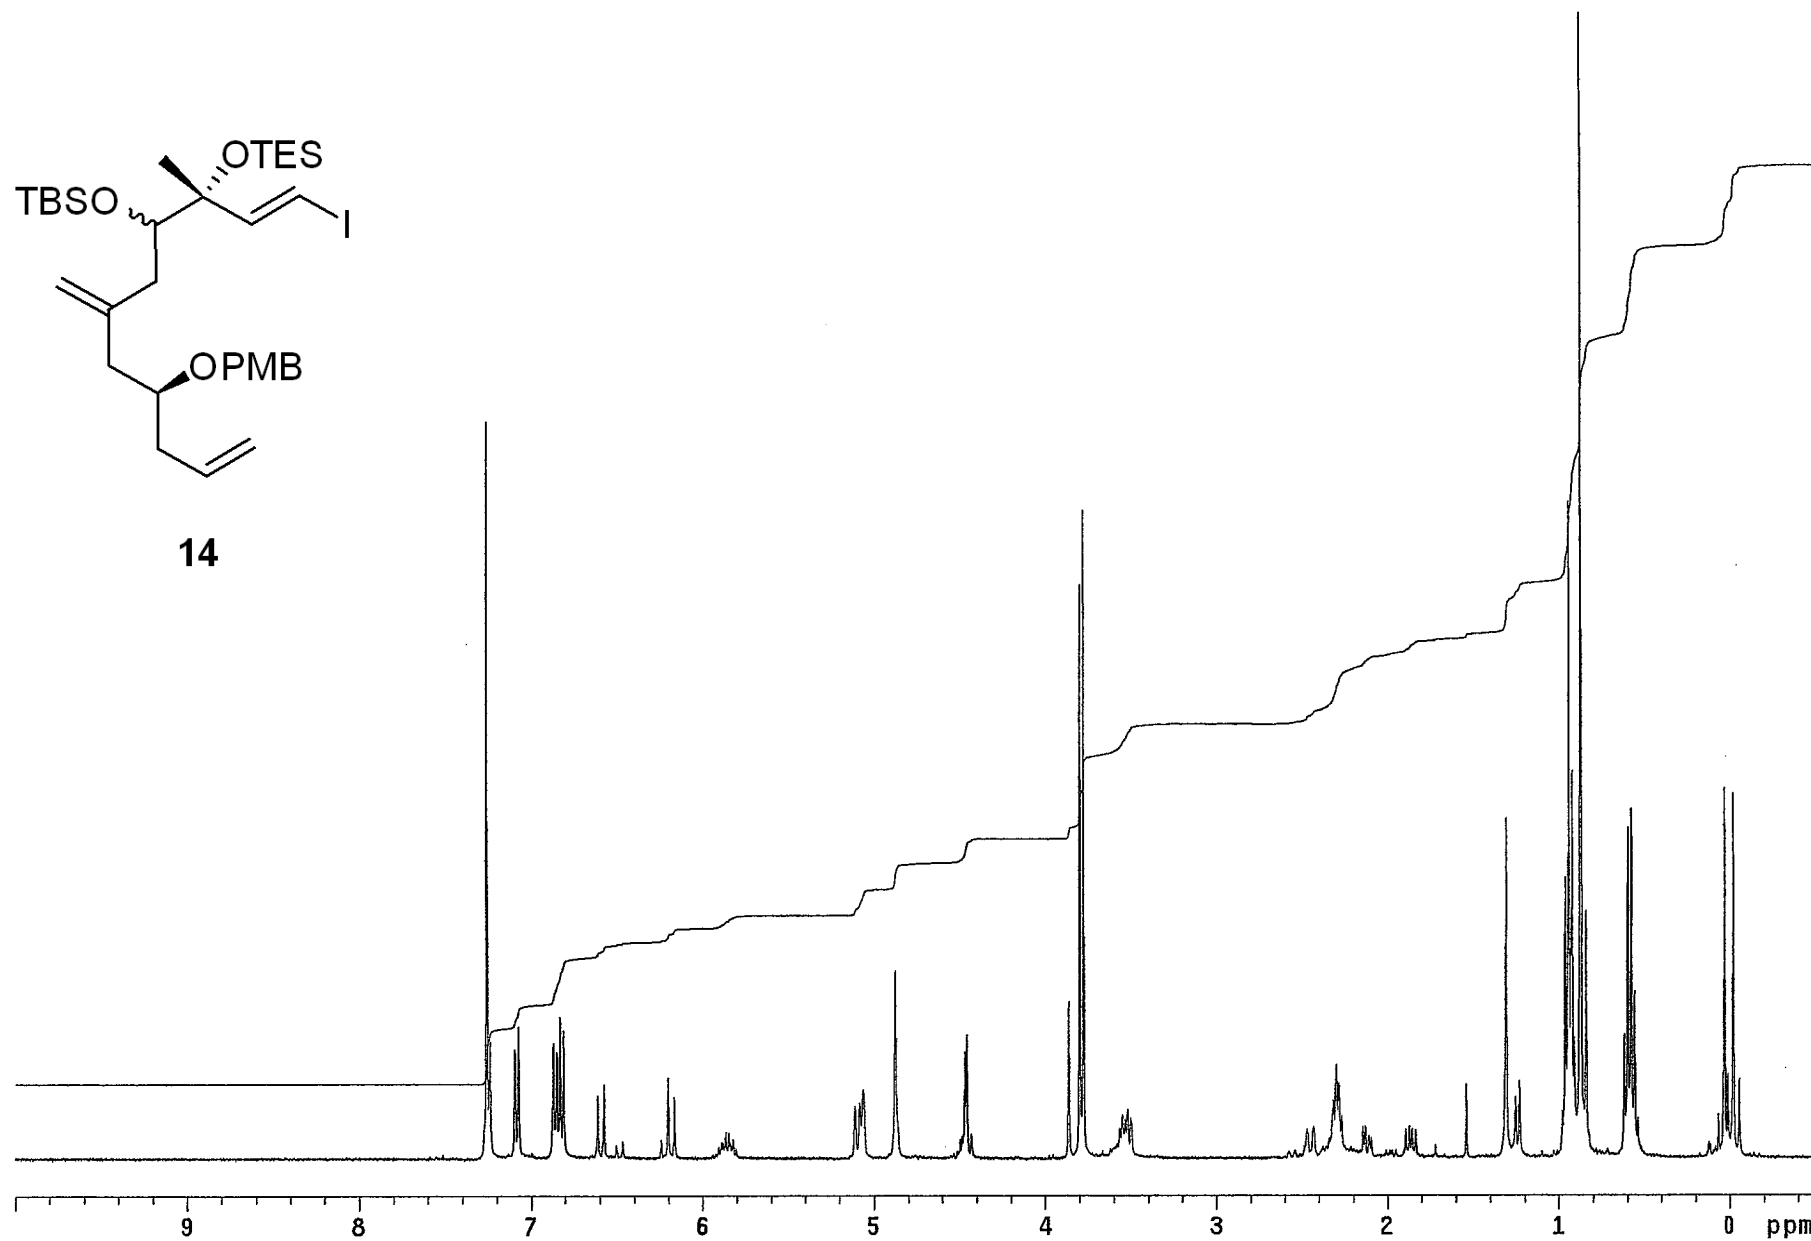

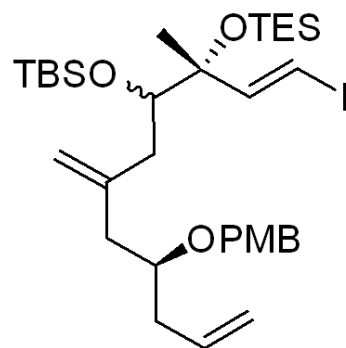

14

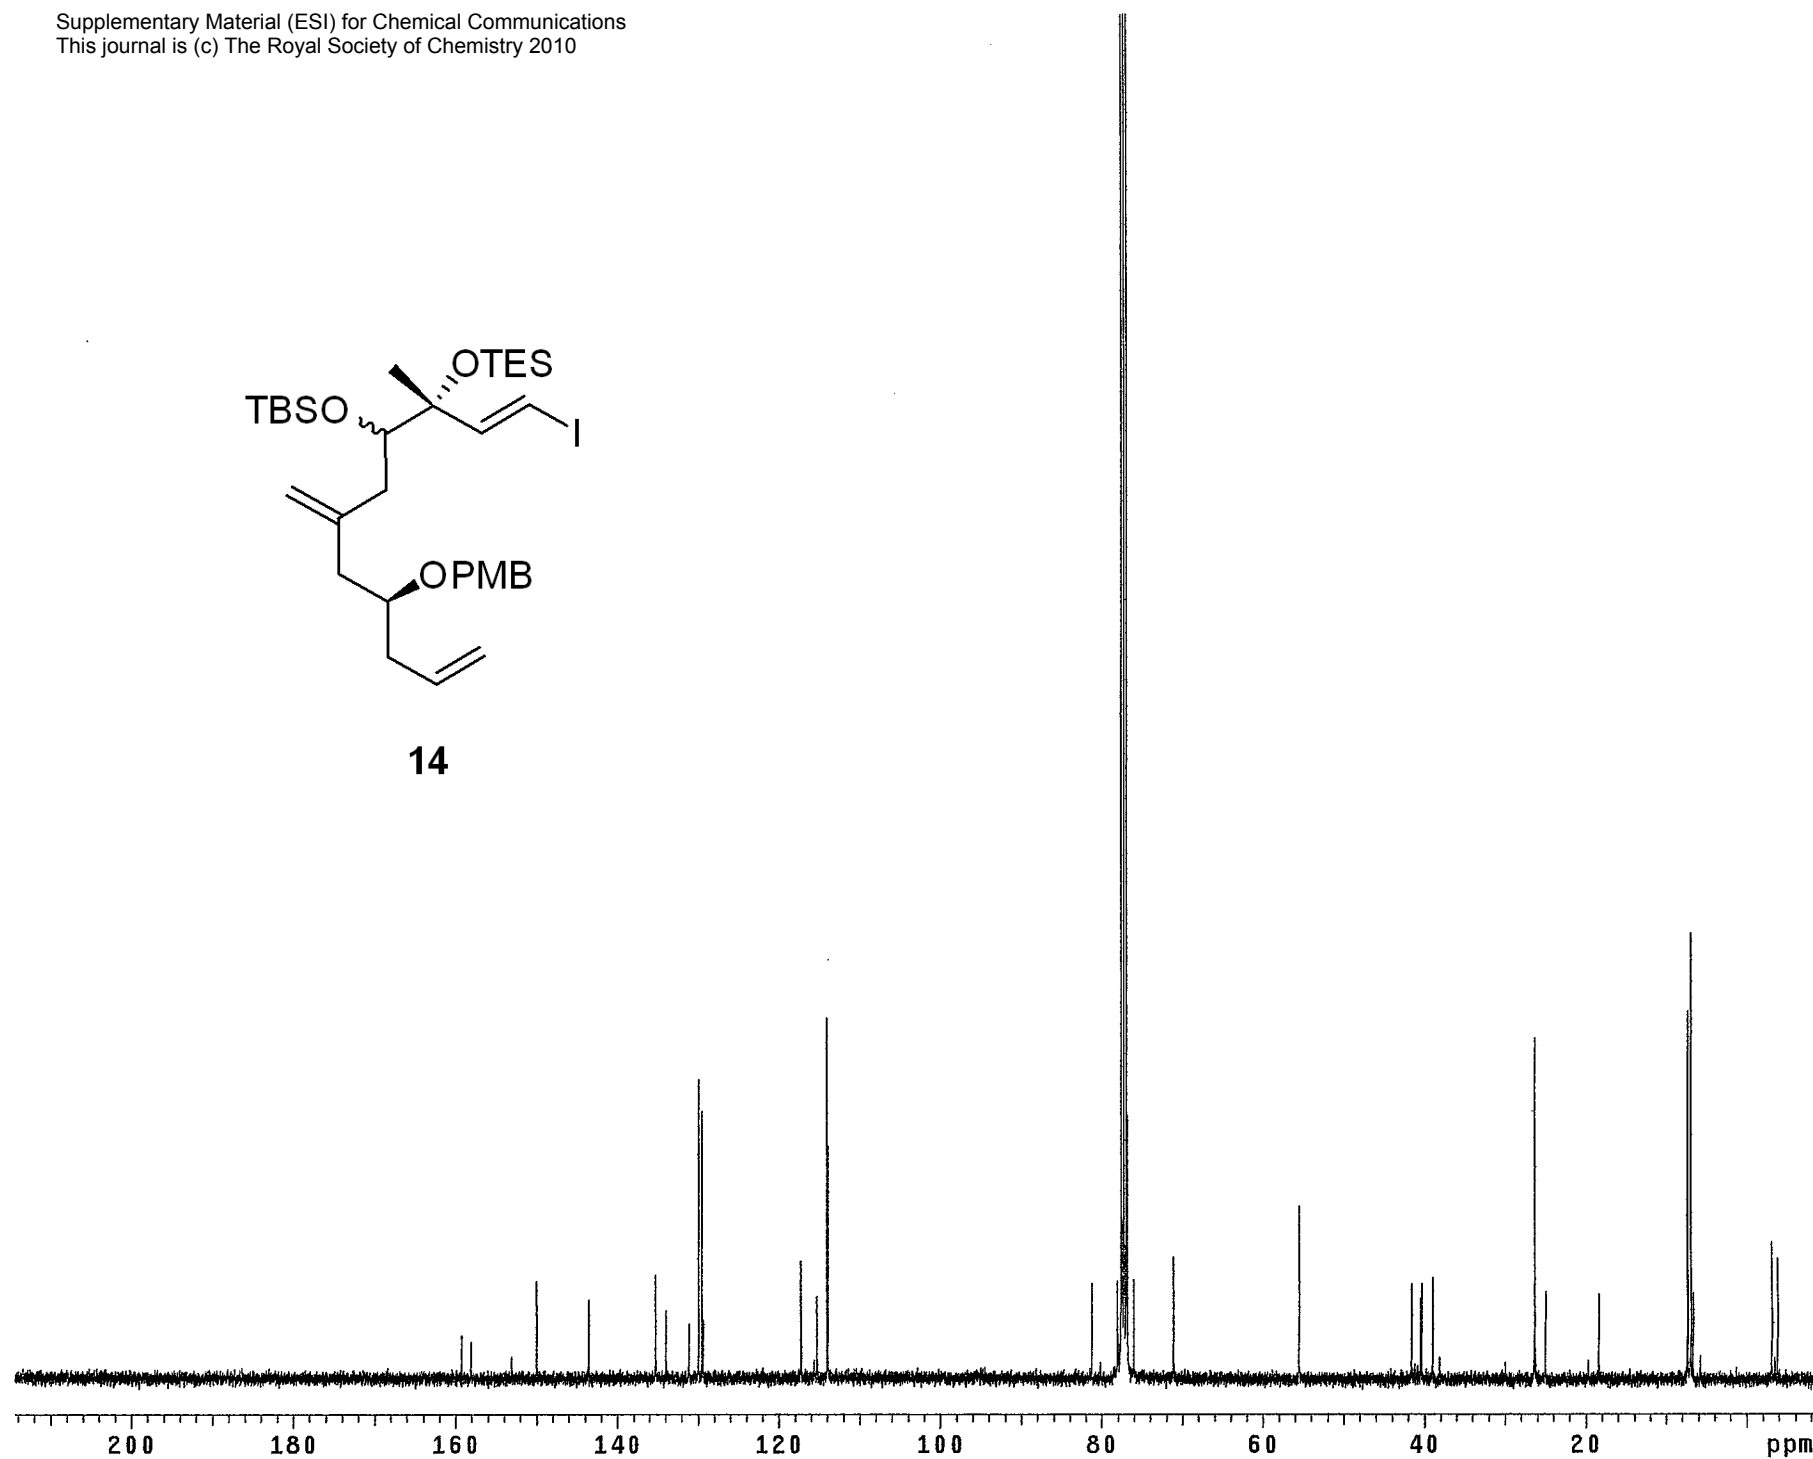

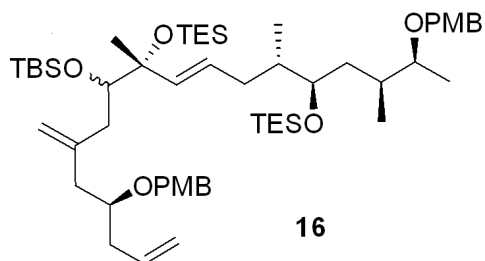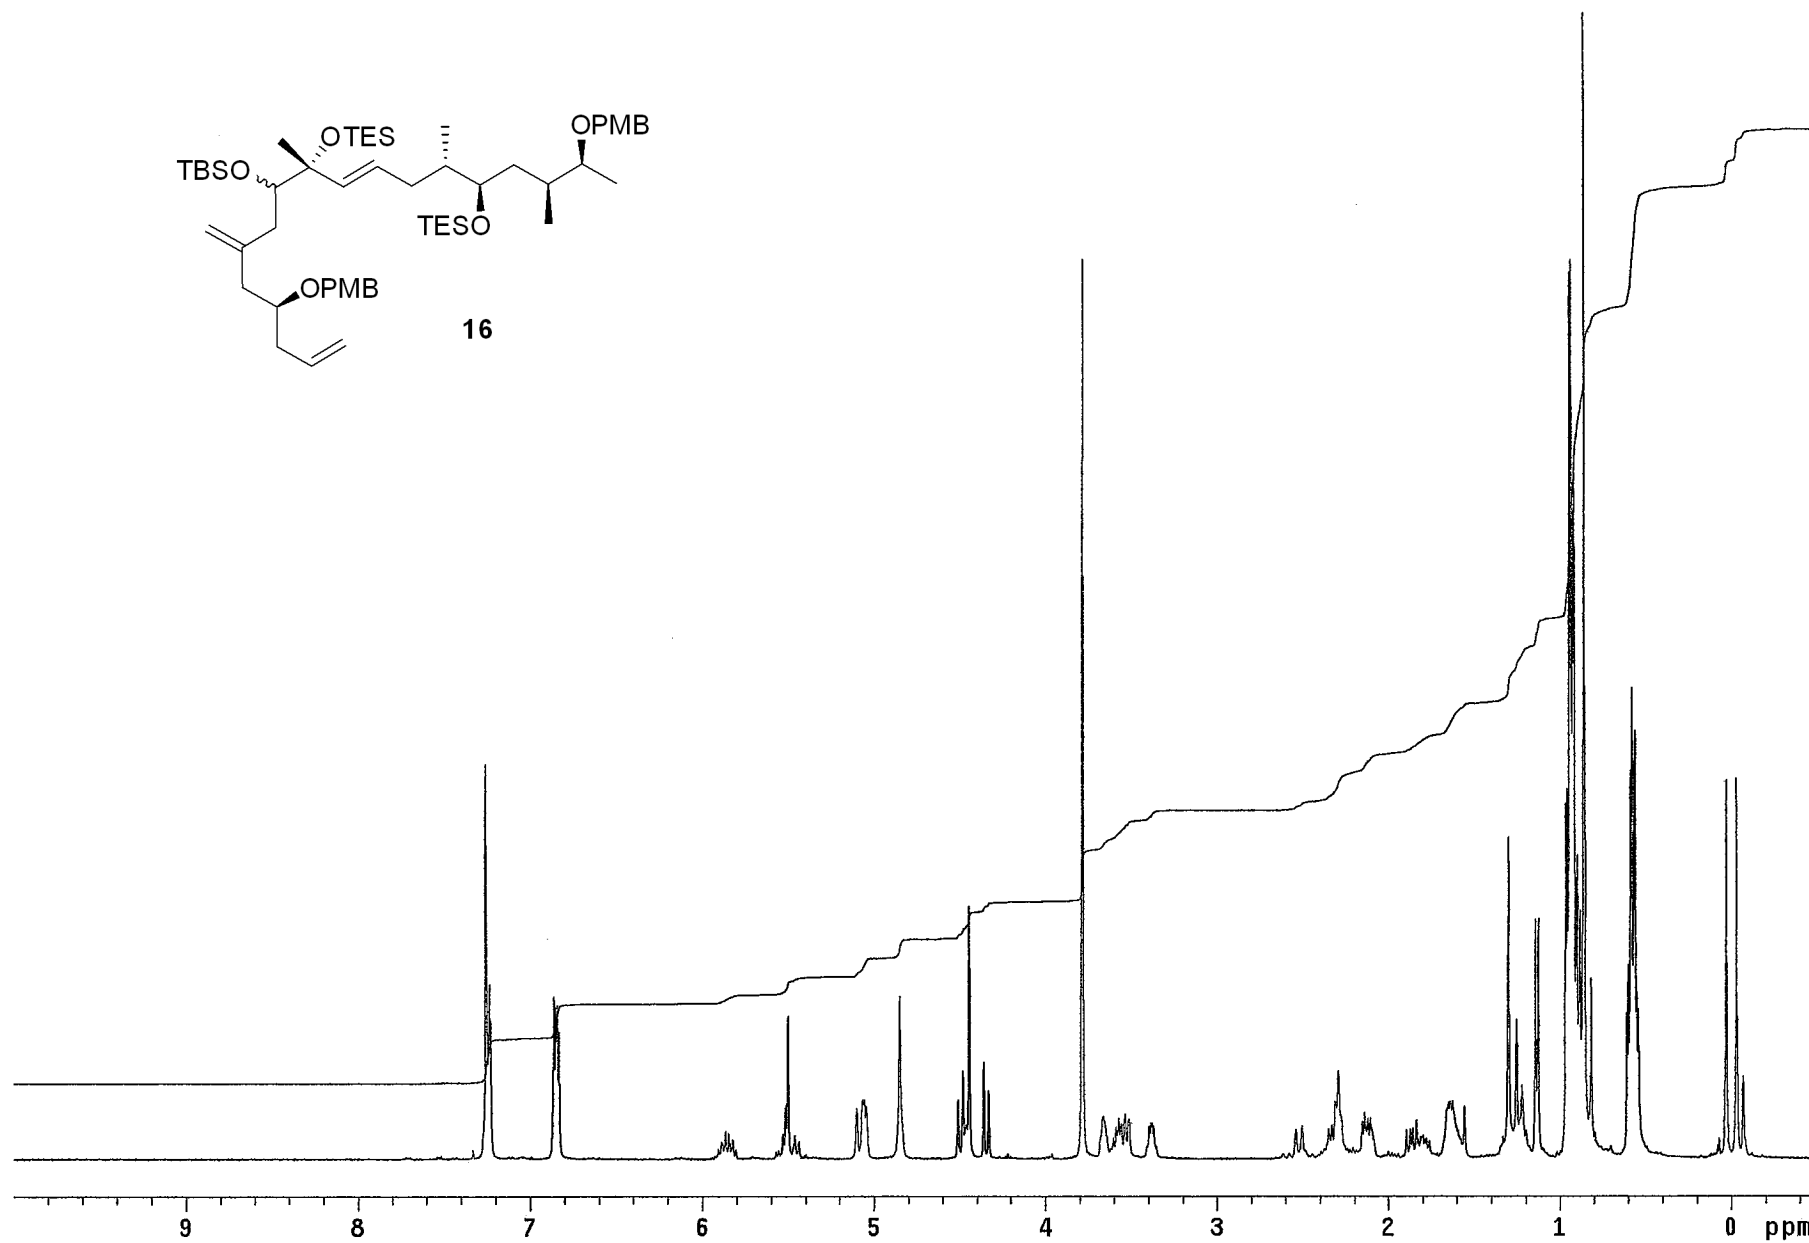

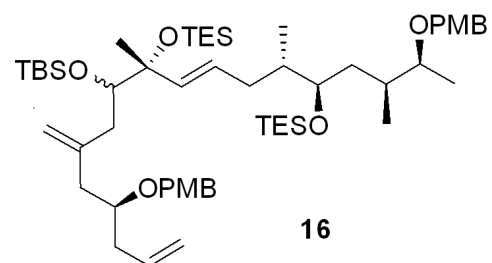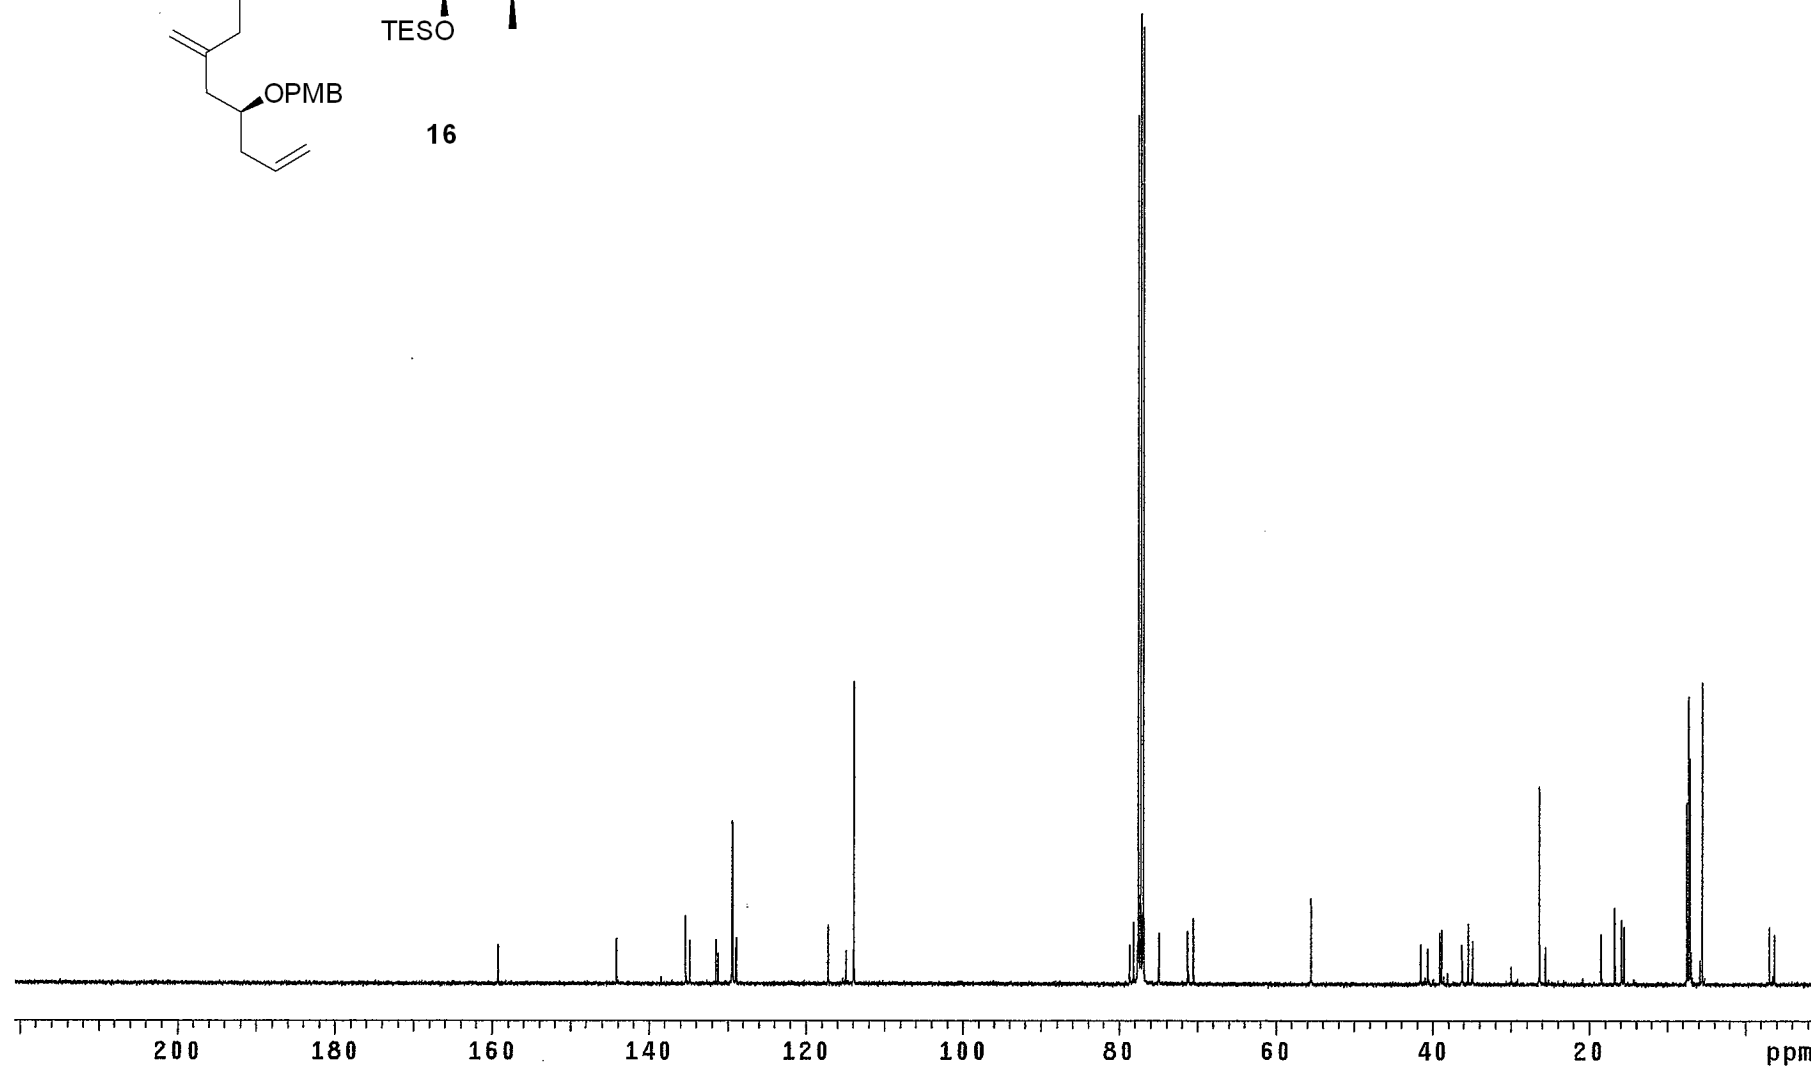

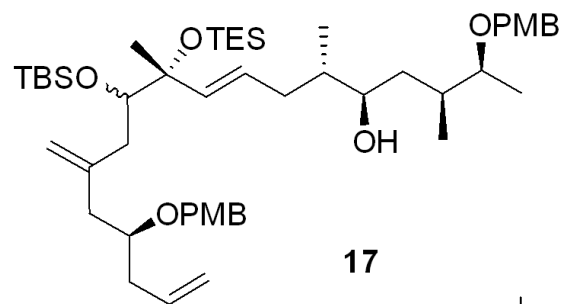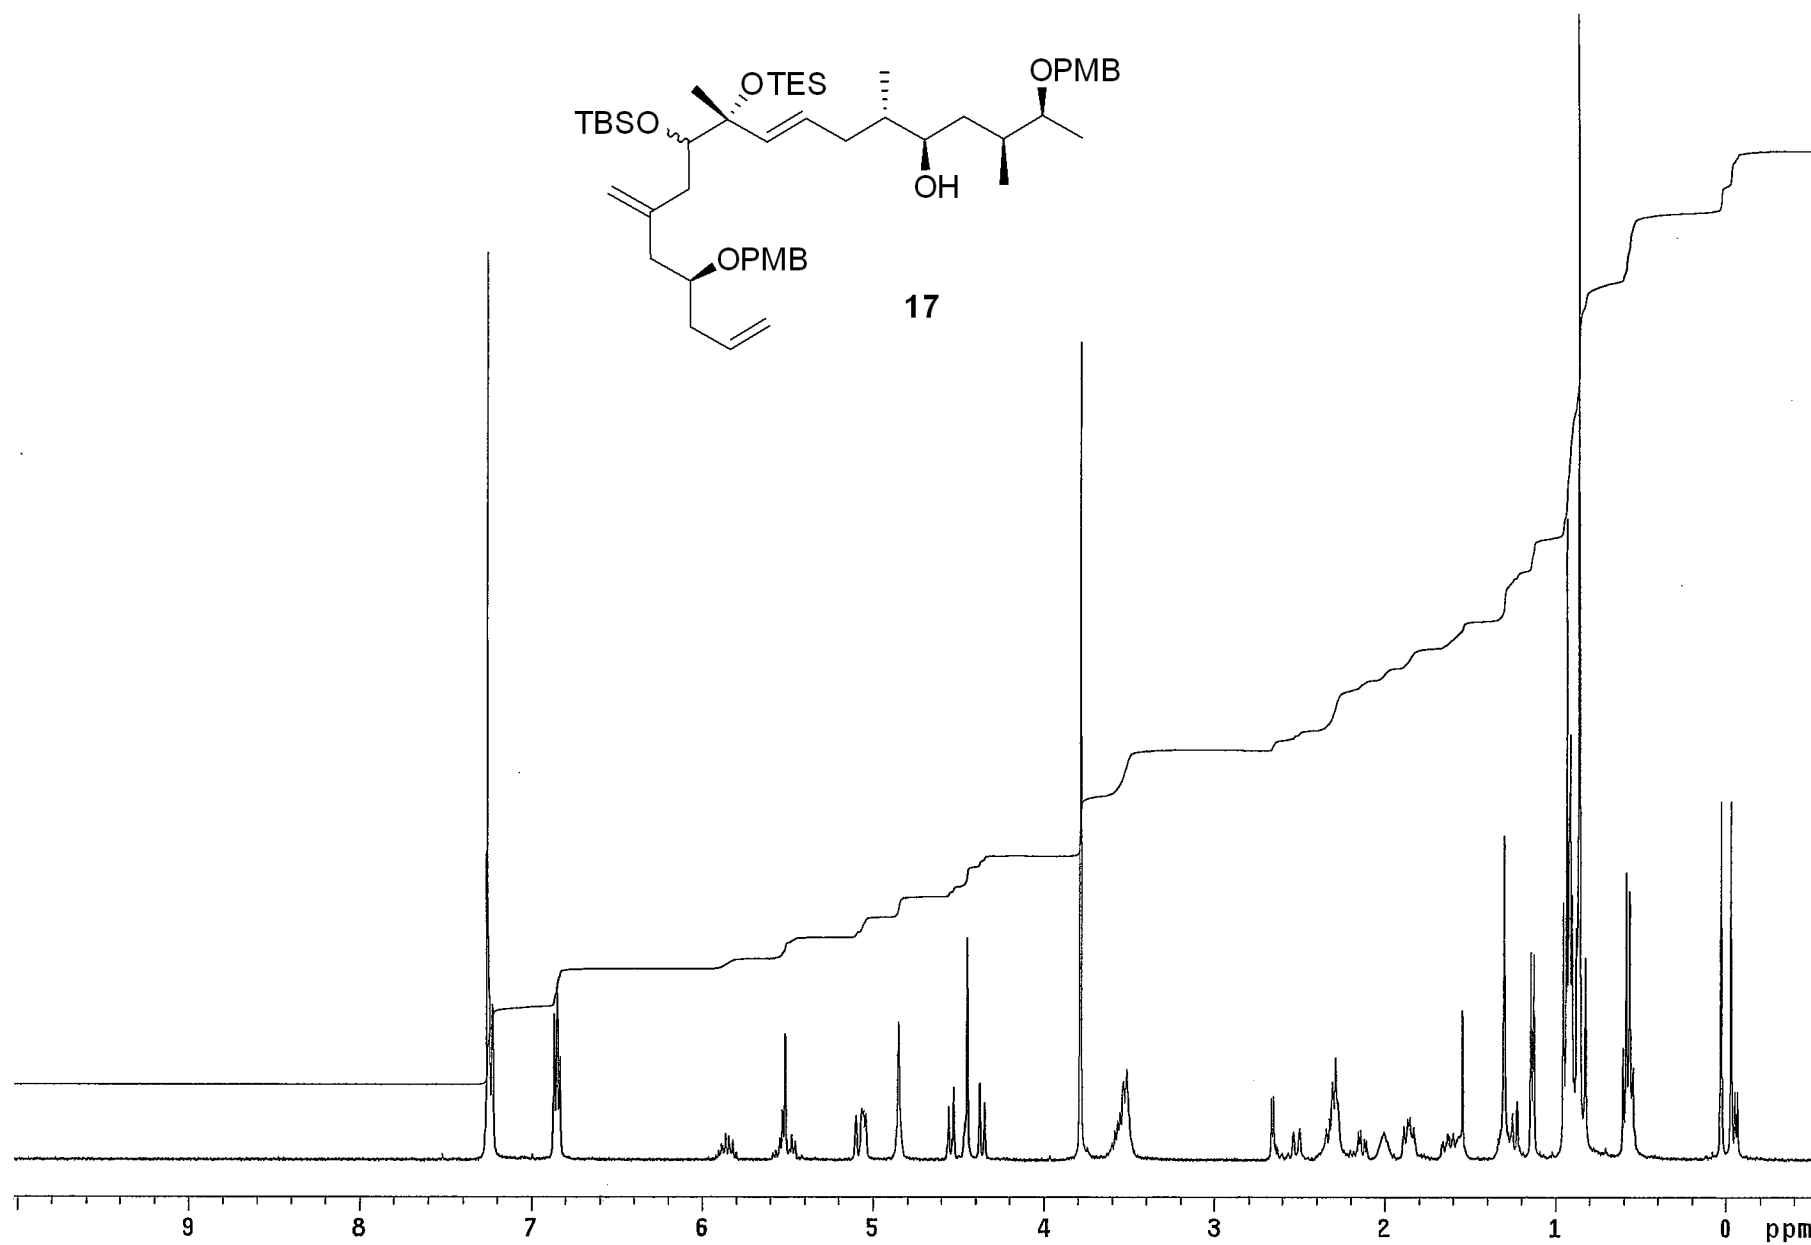

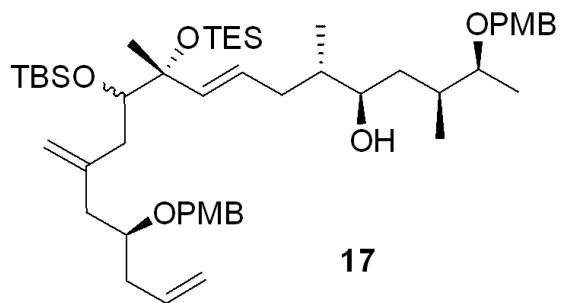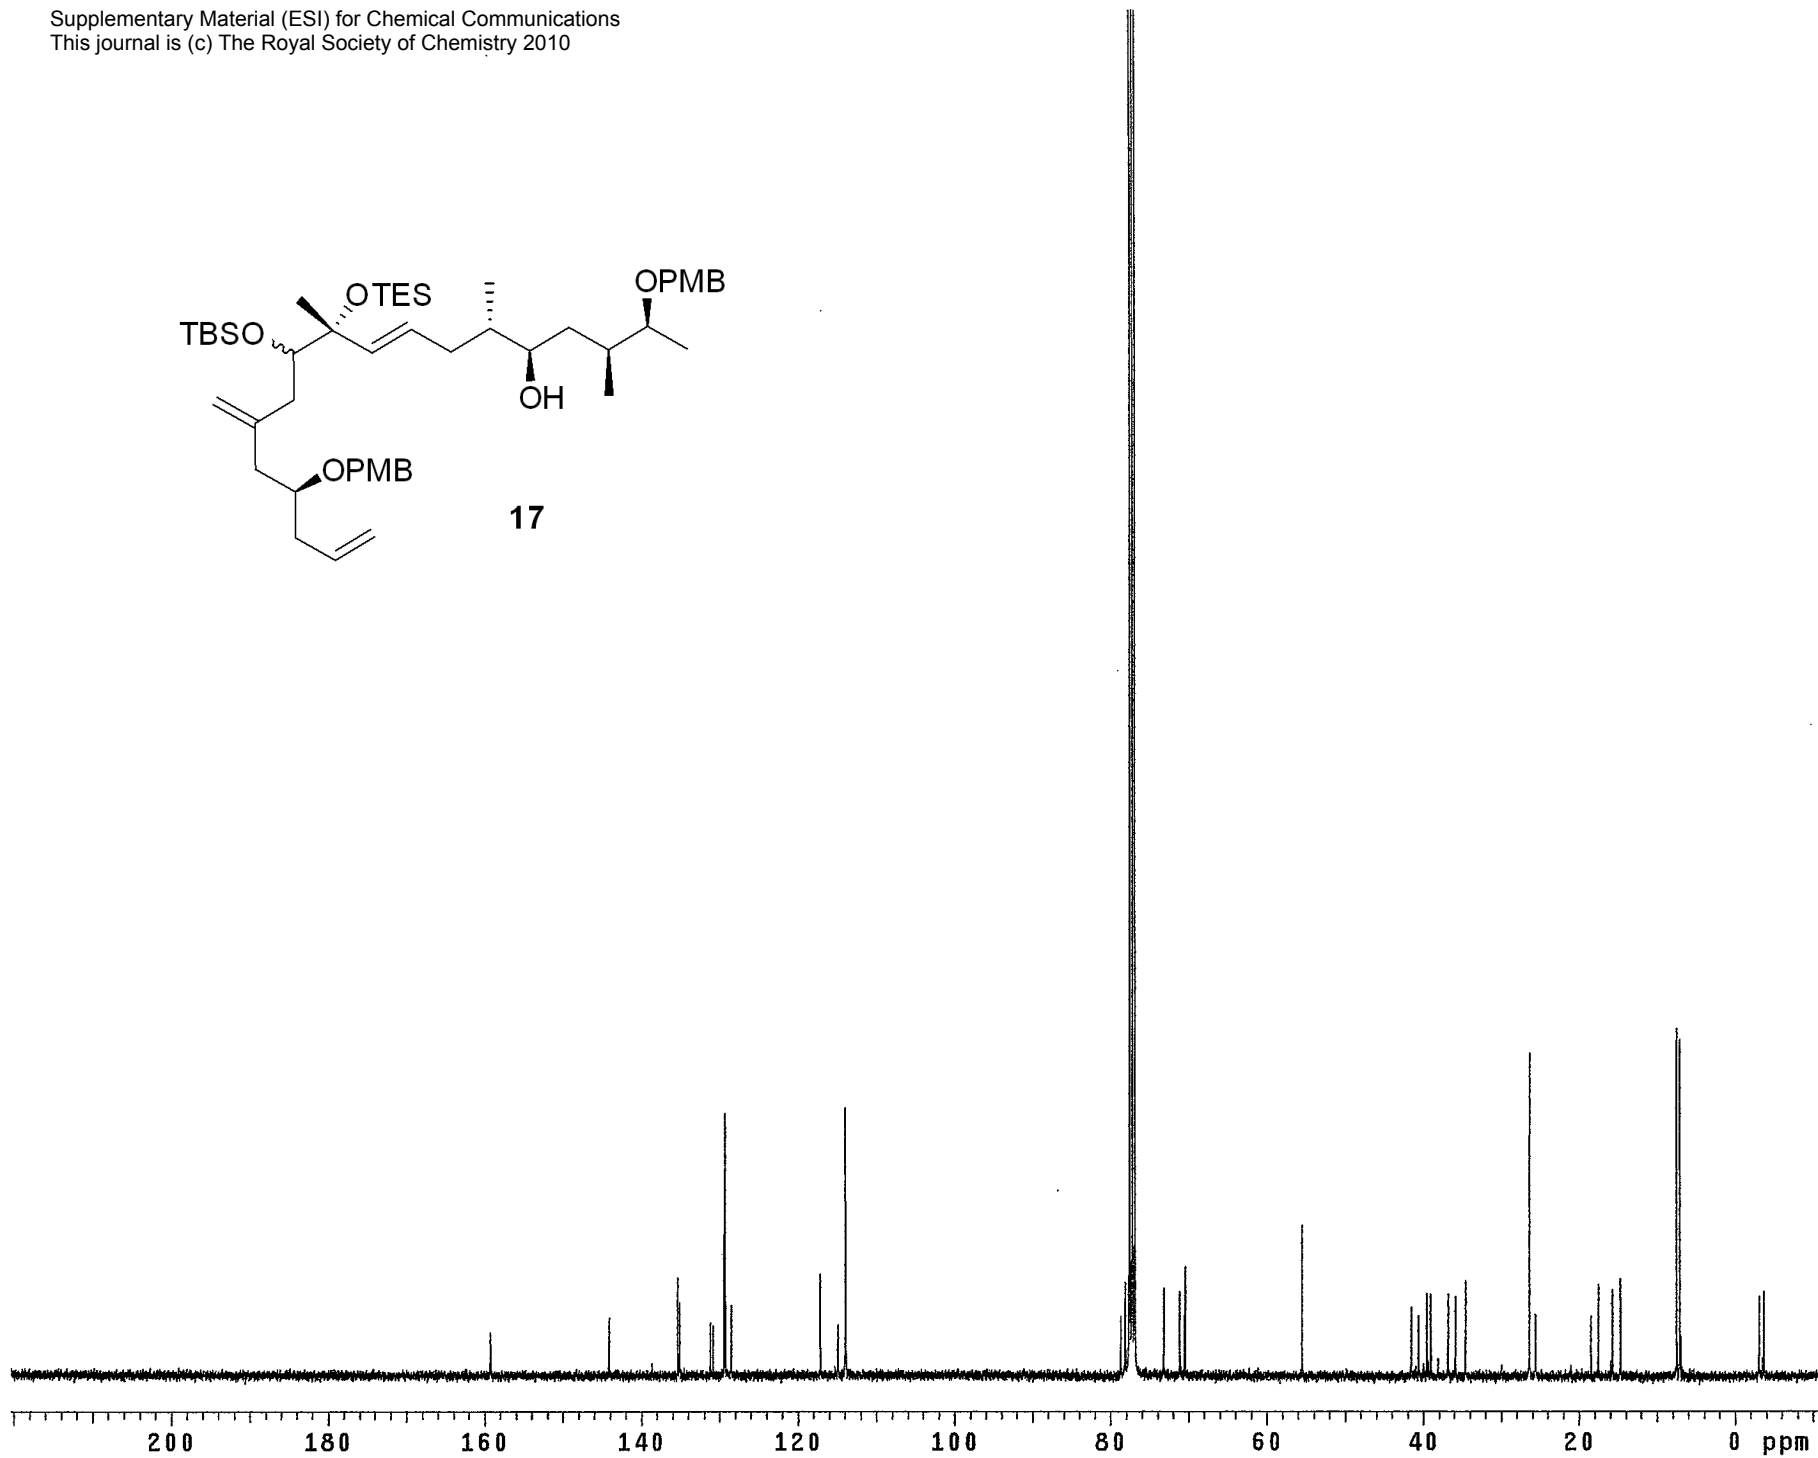



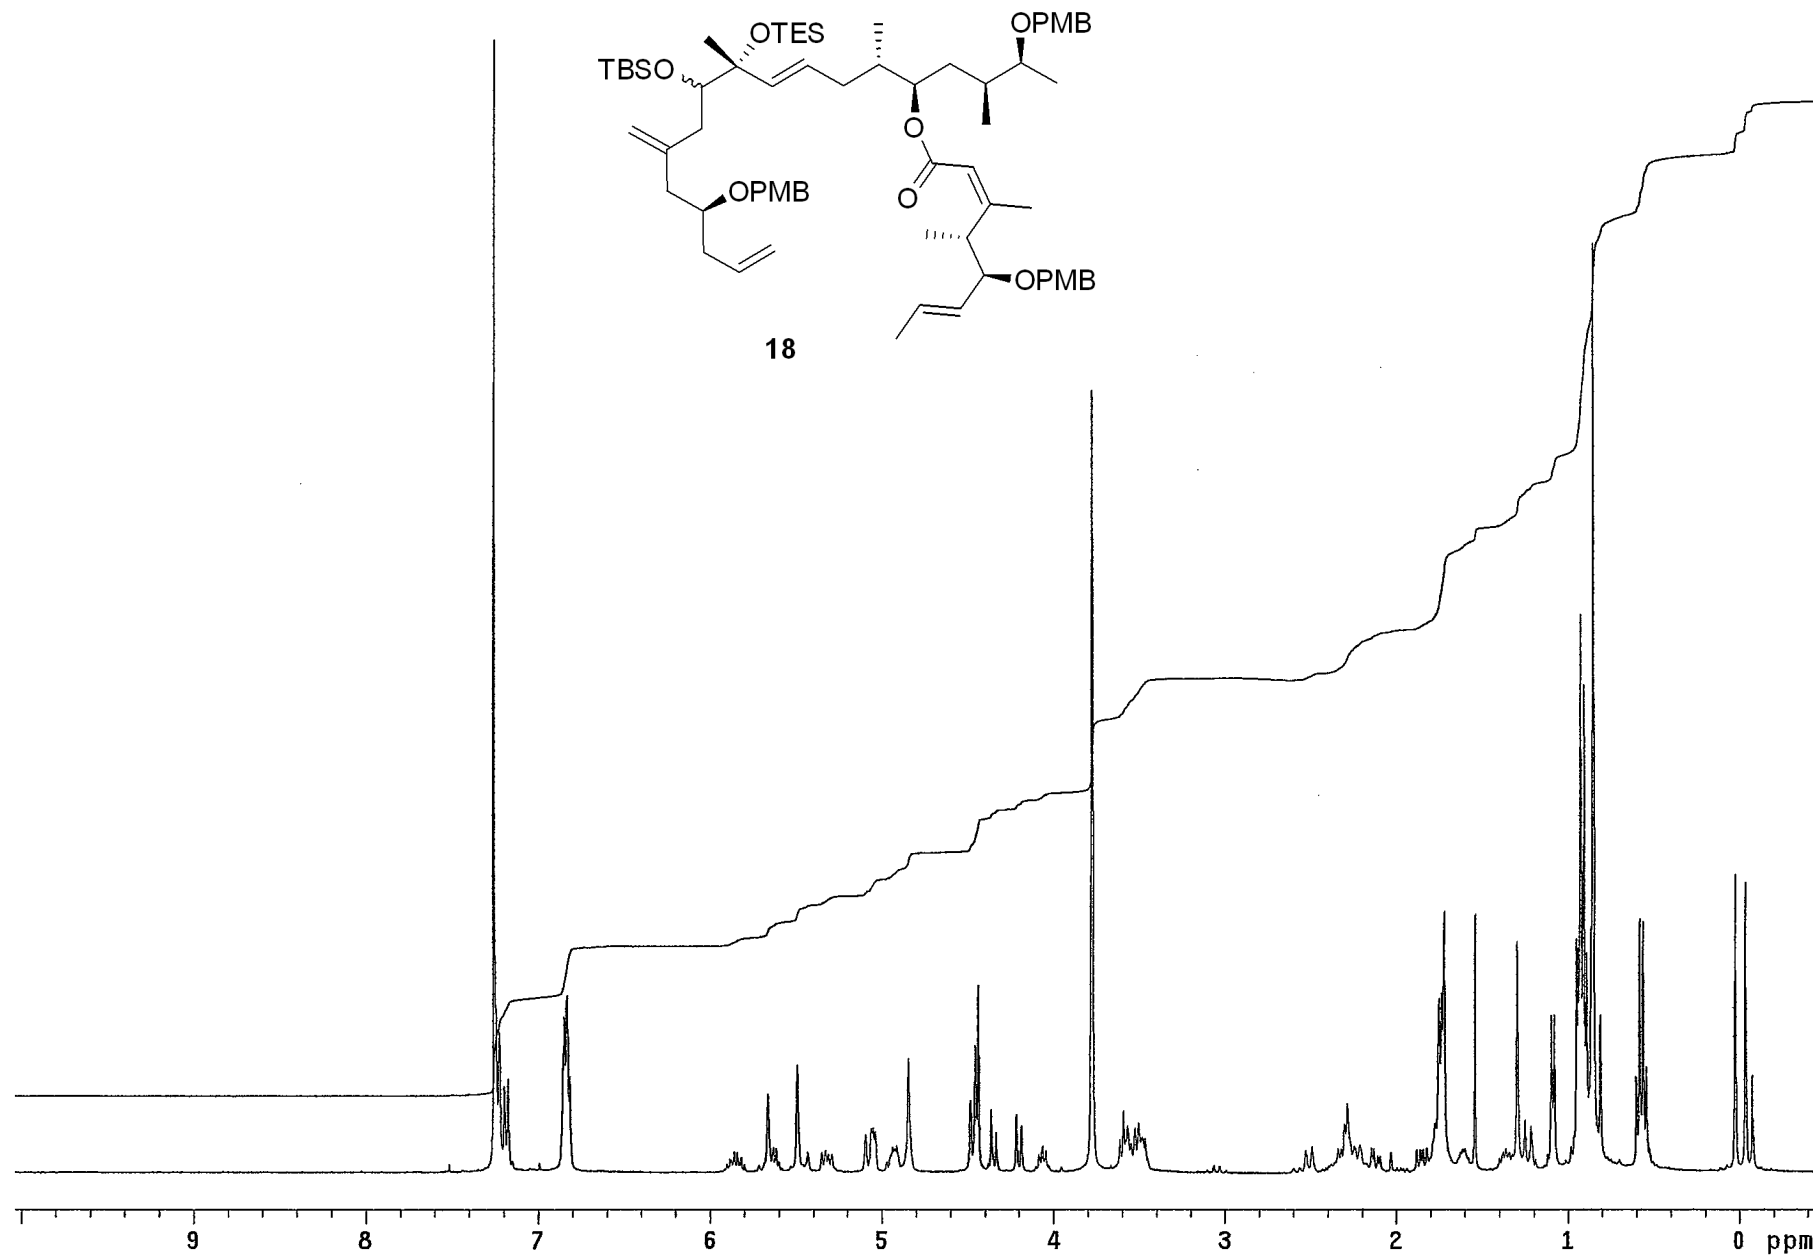

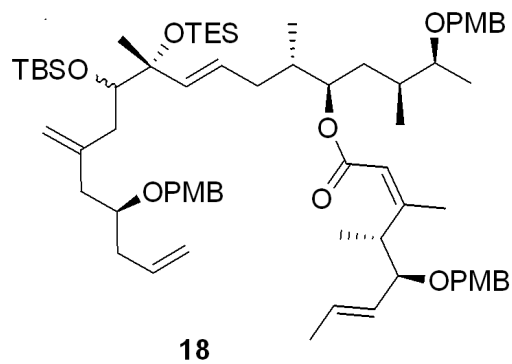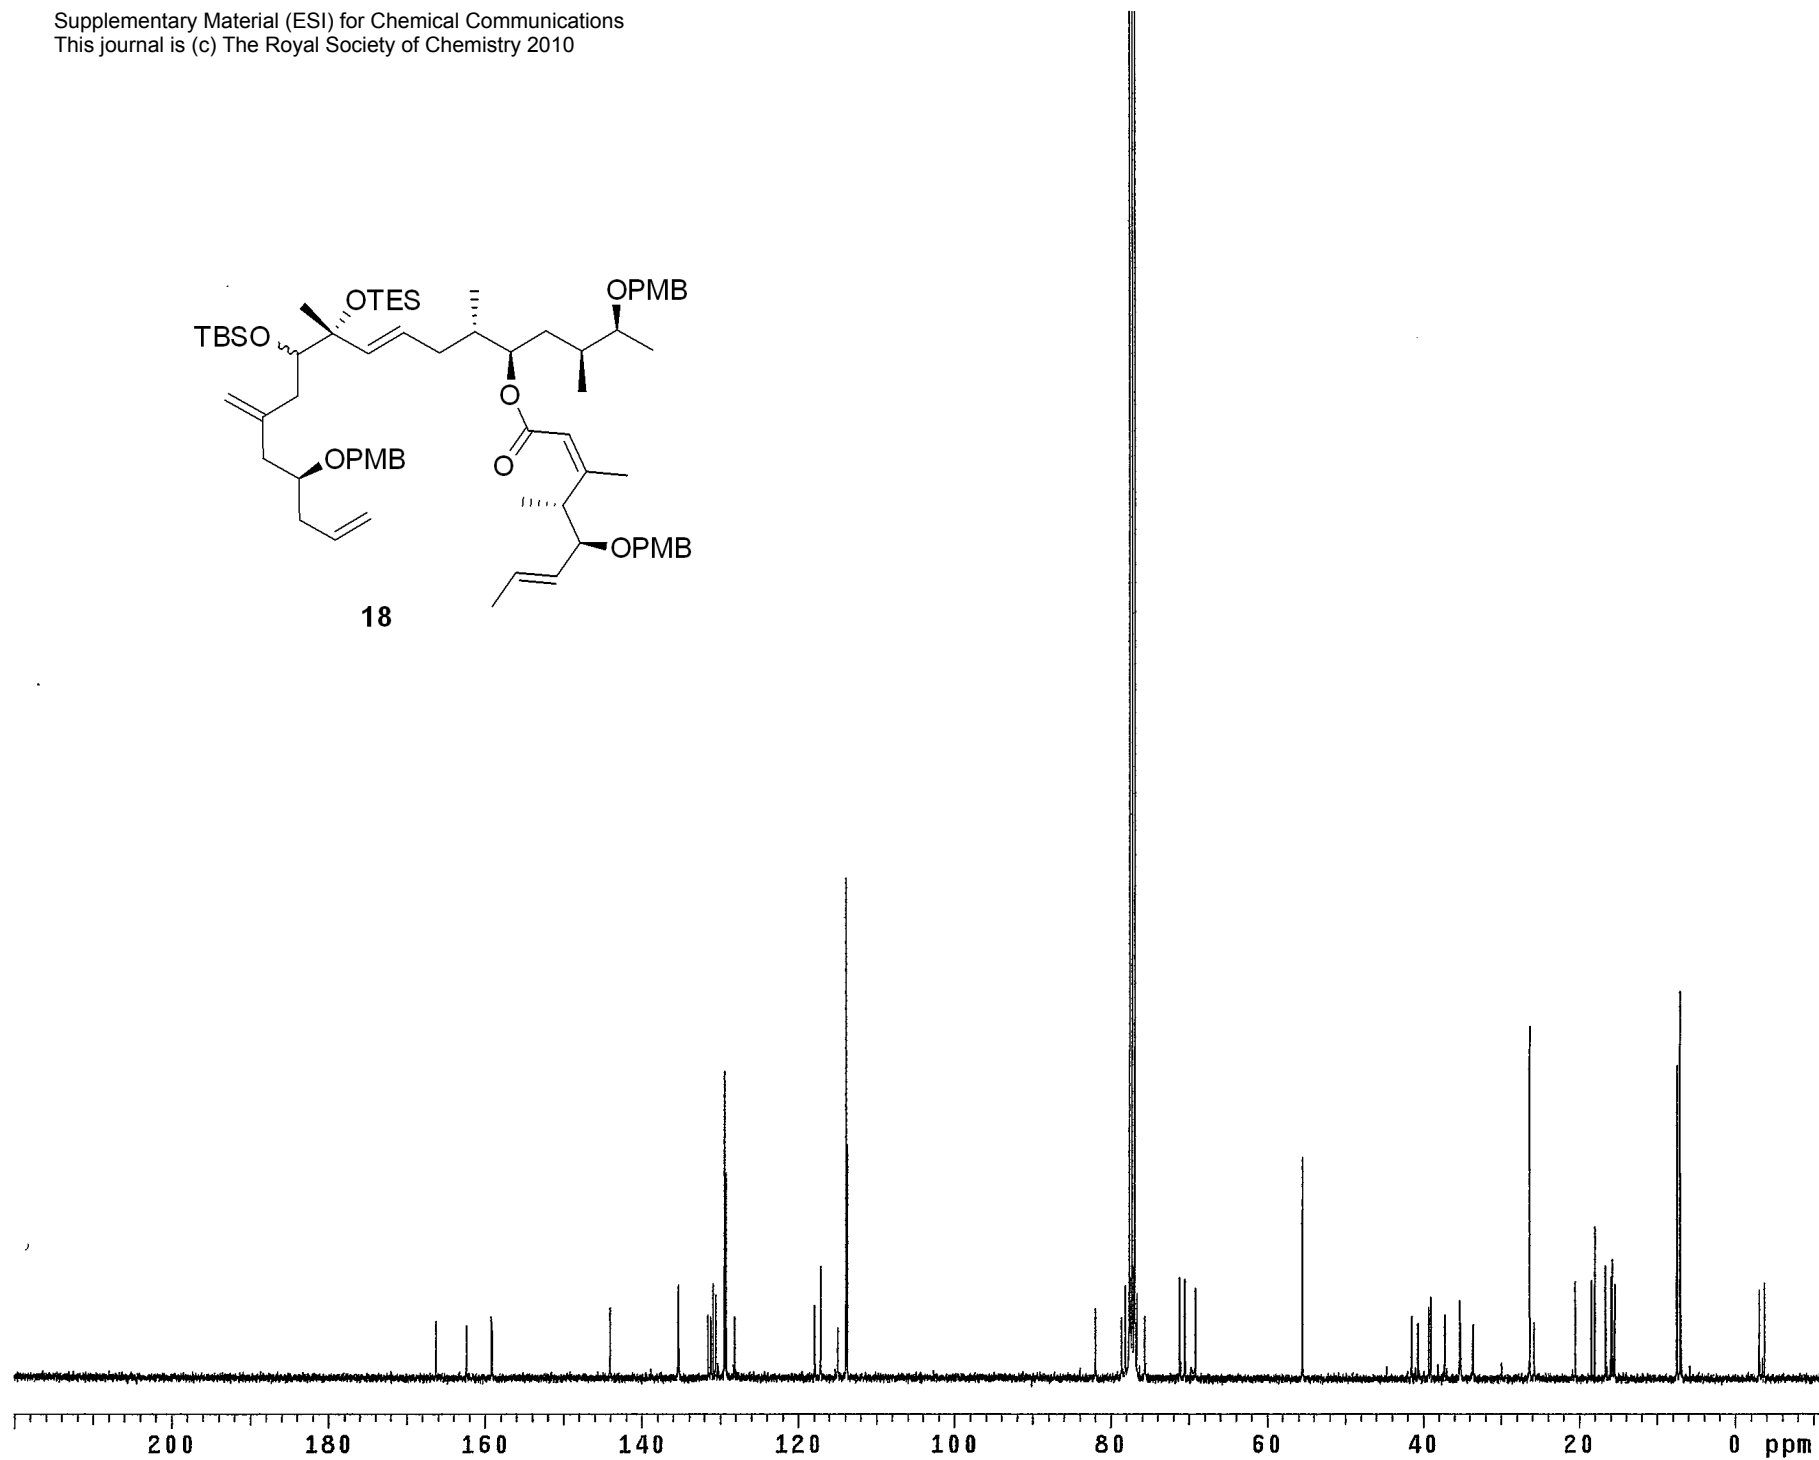

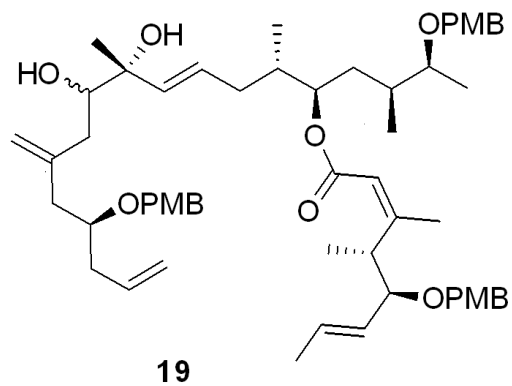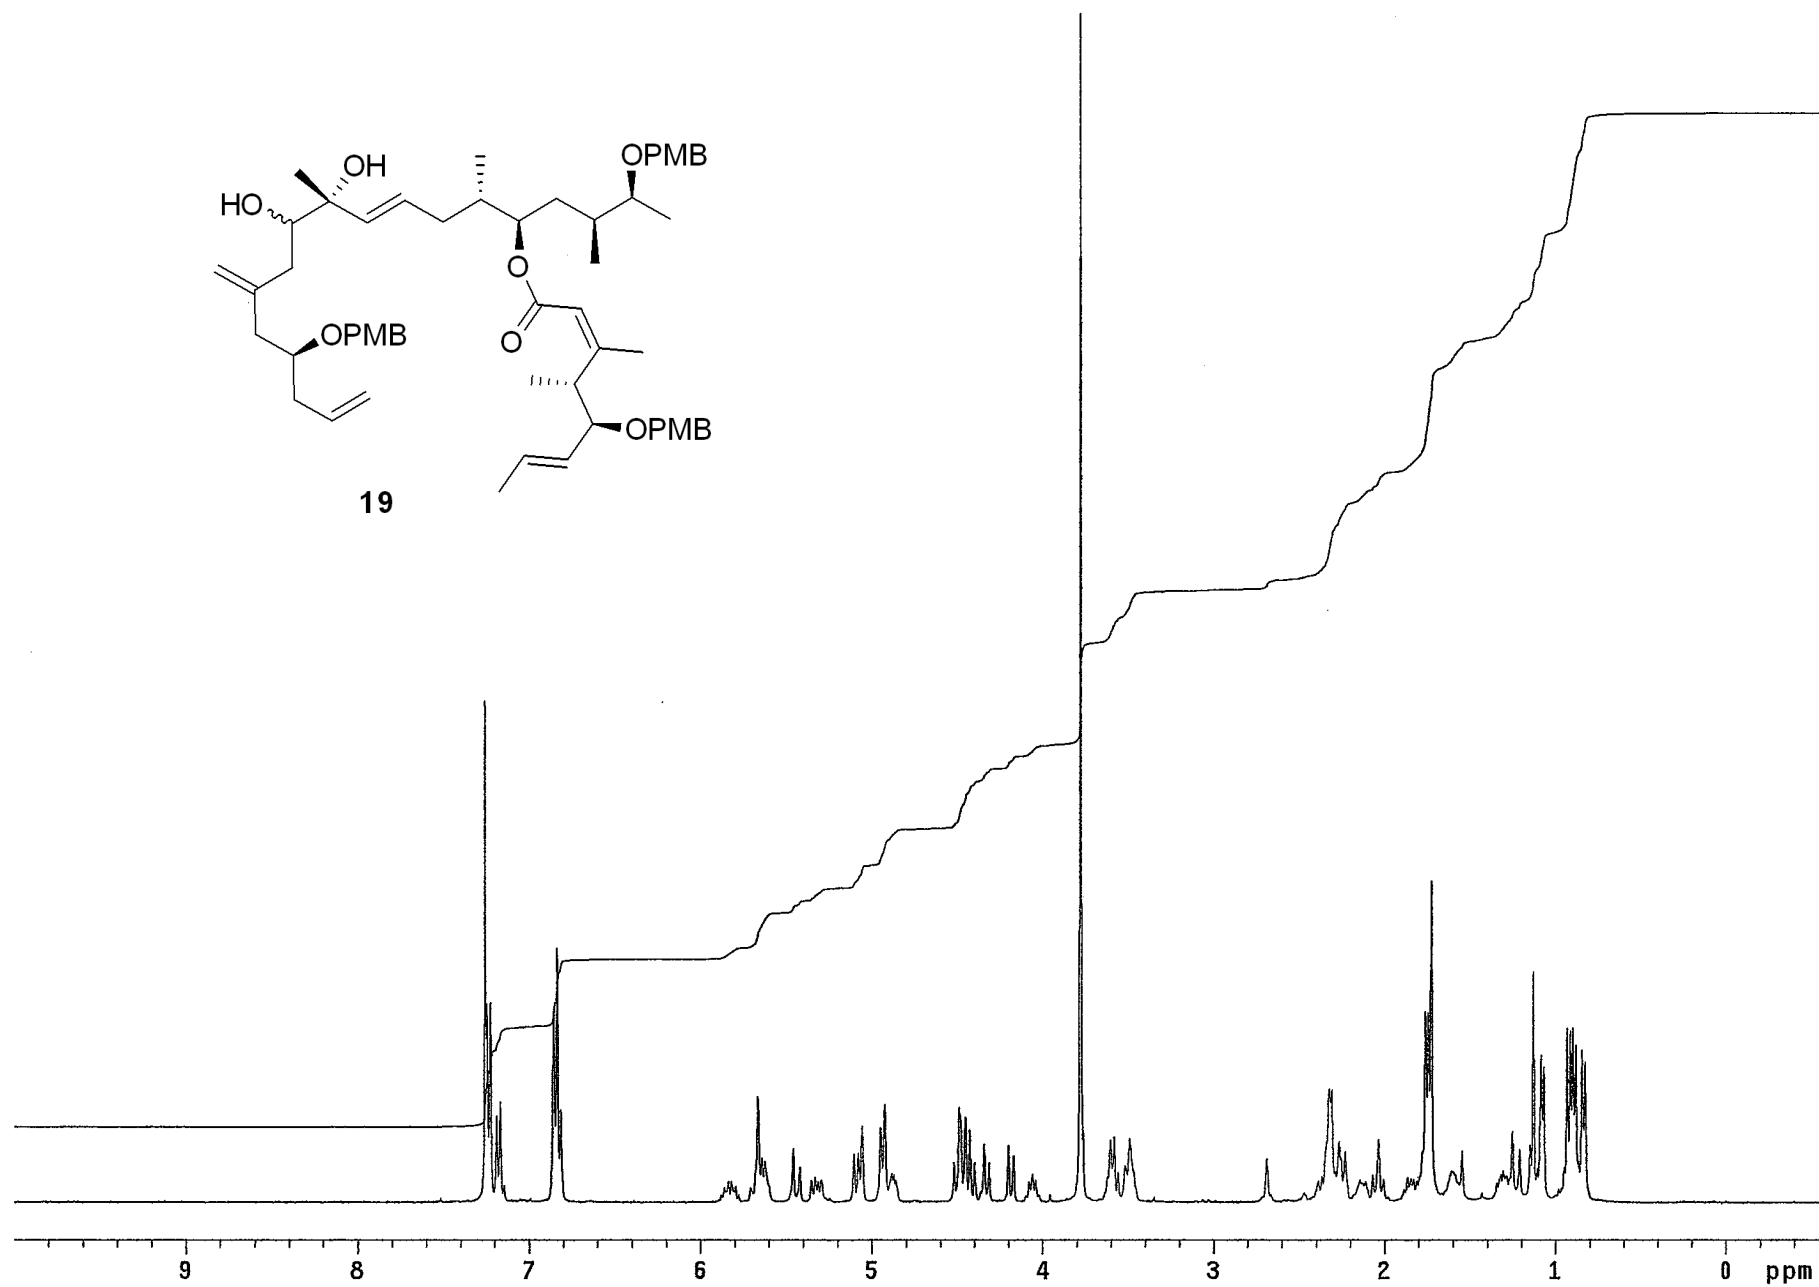

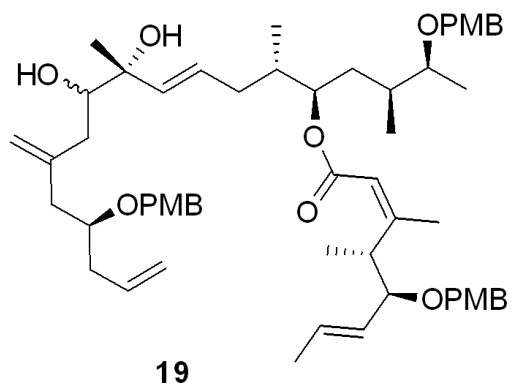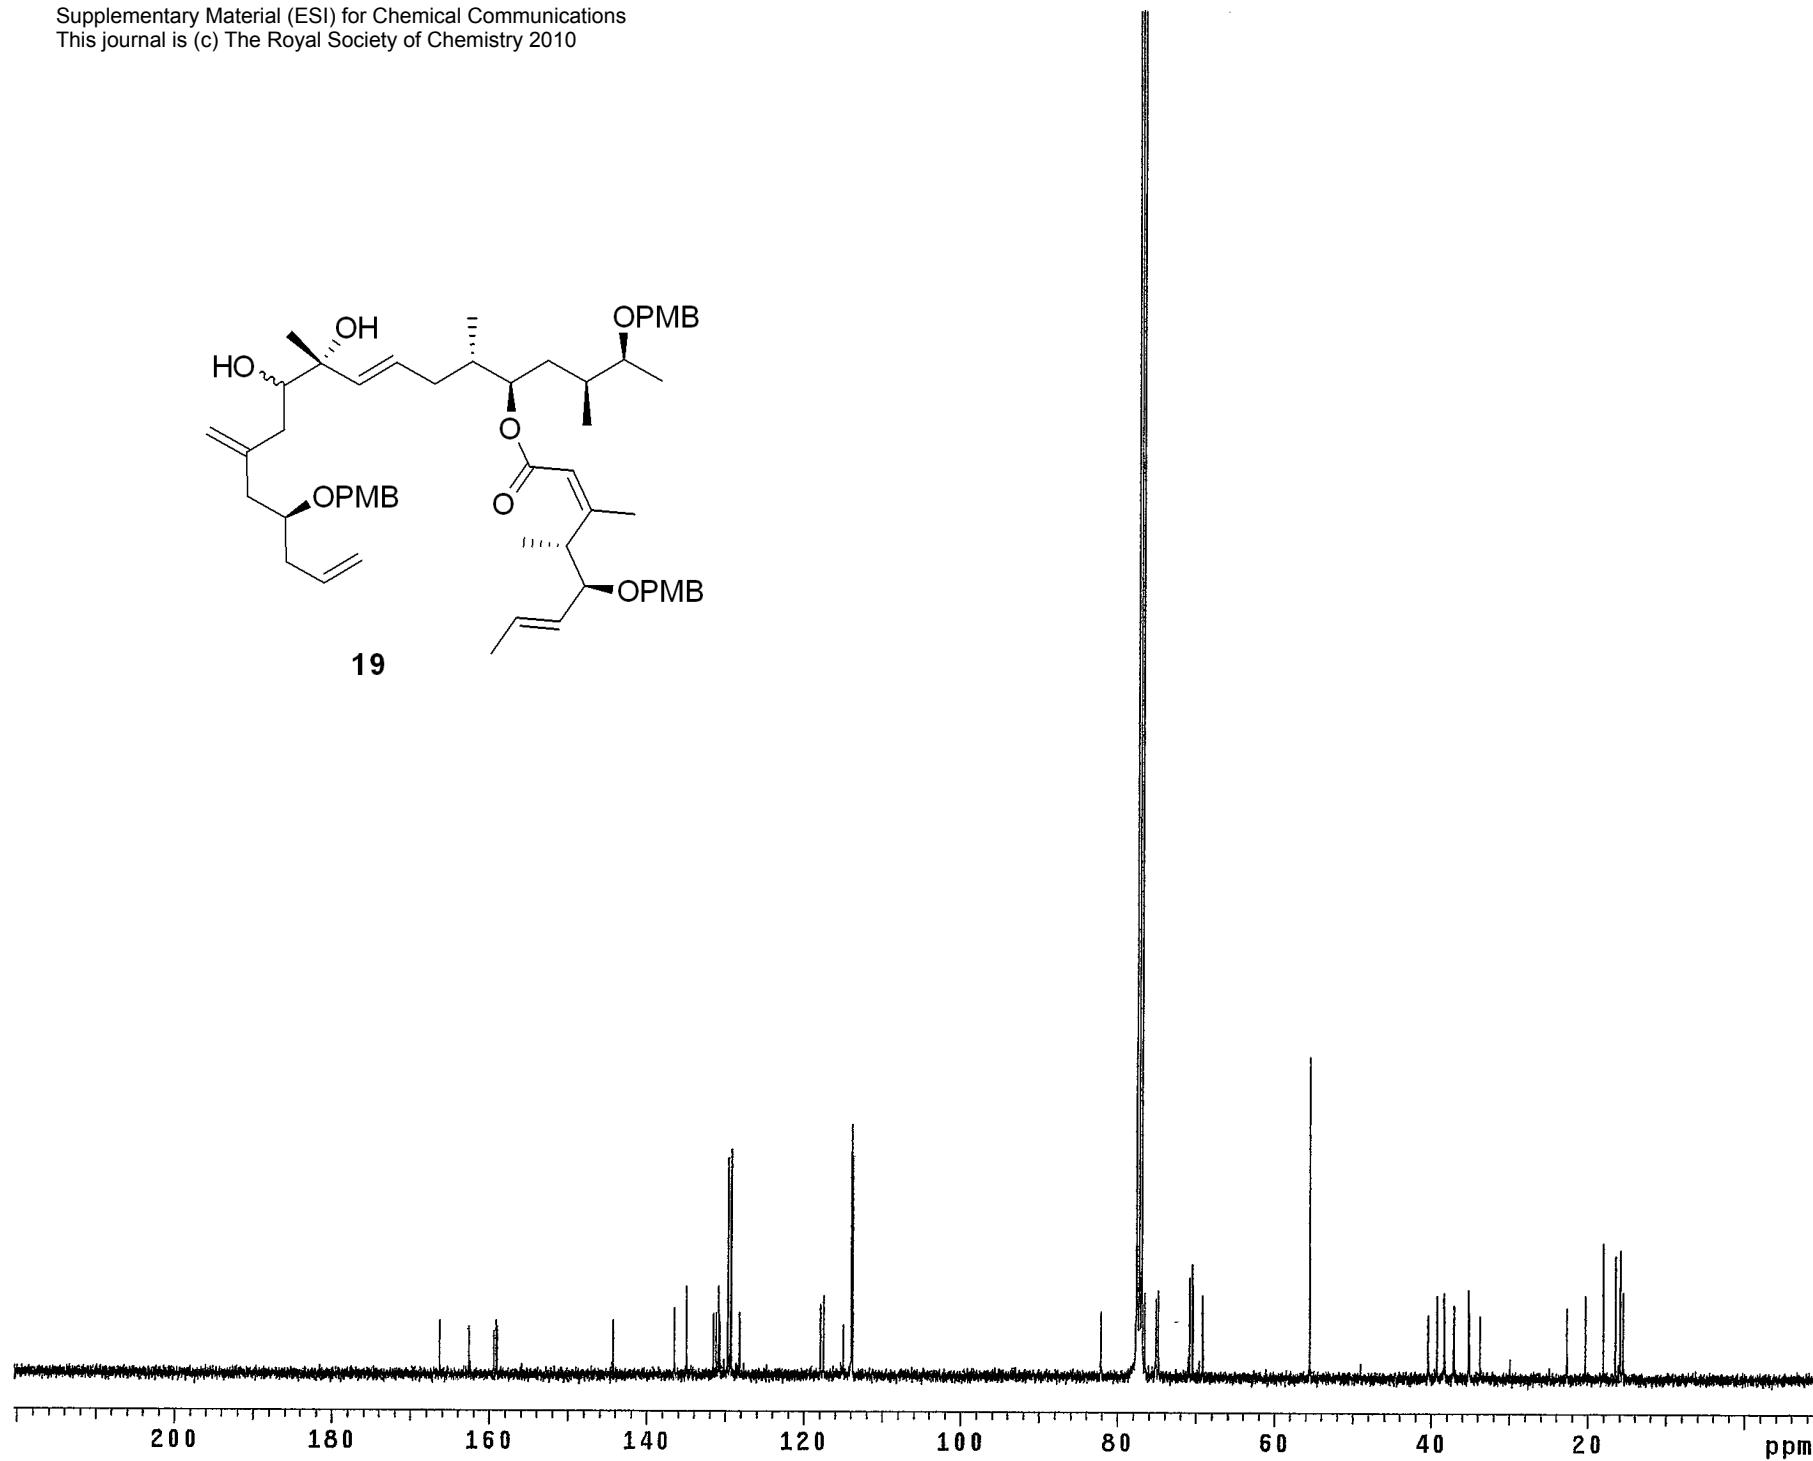

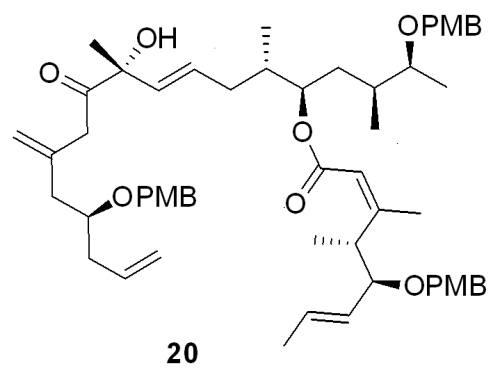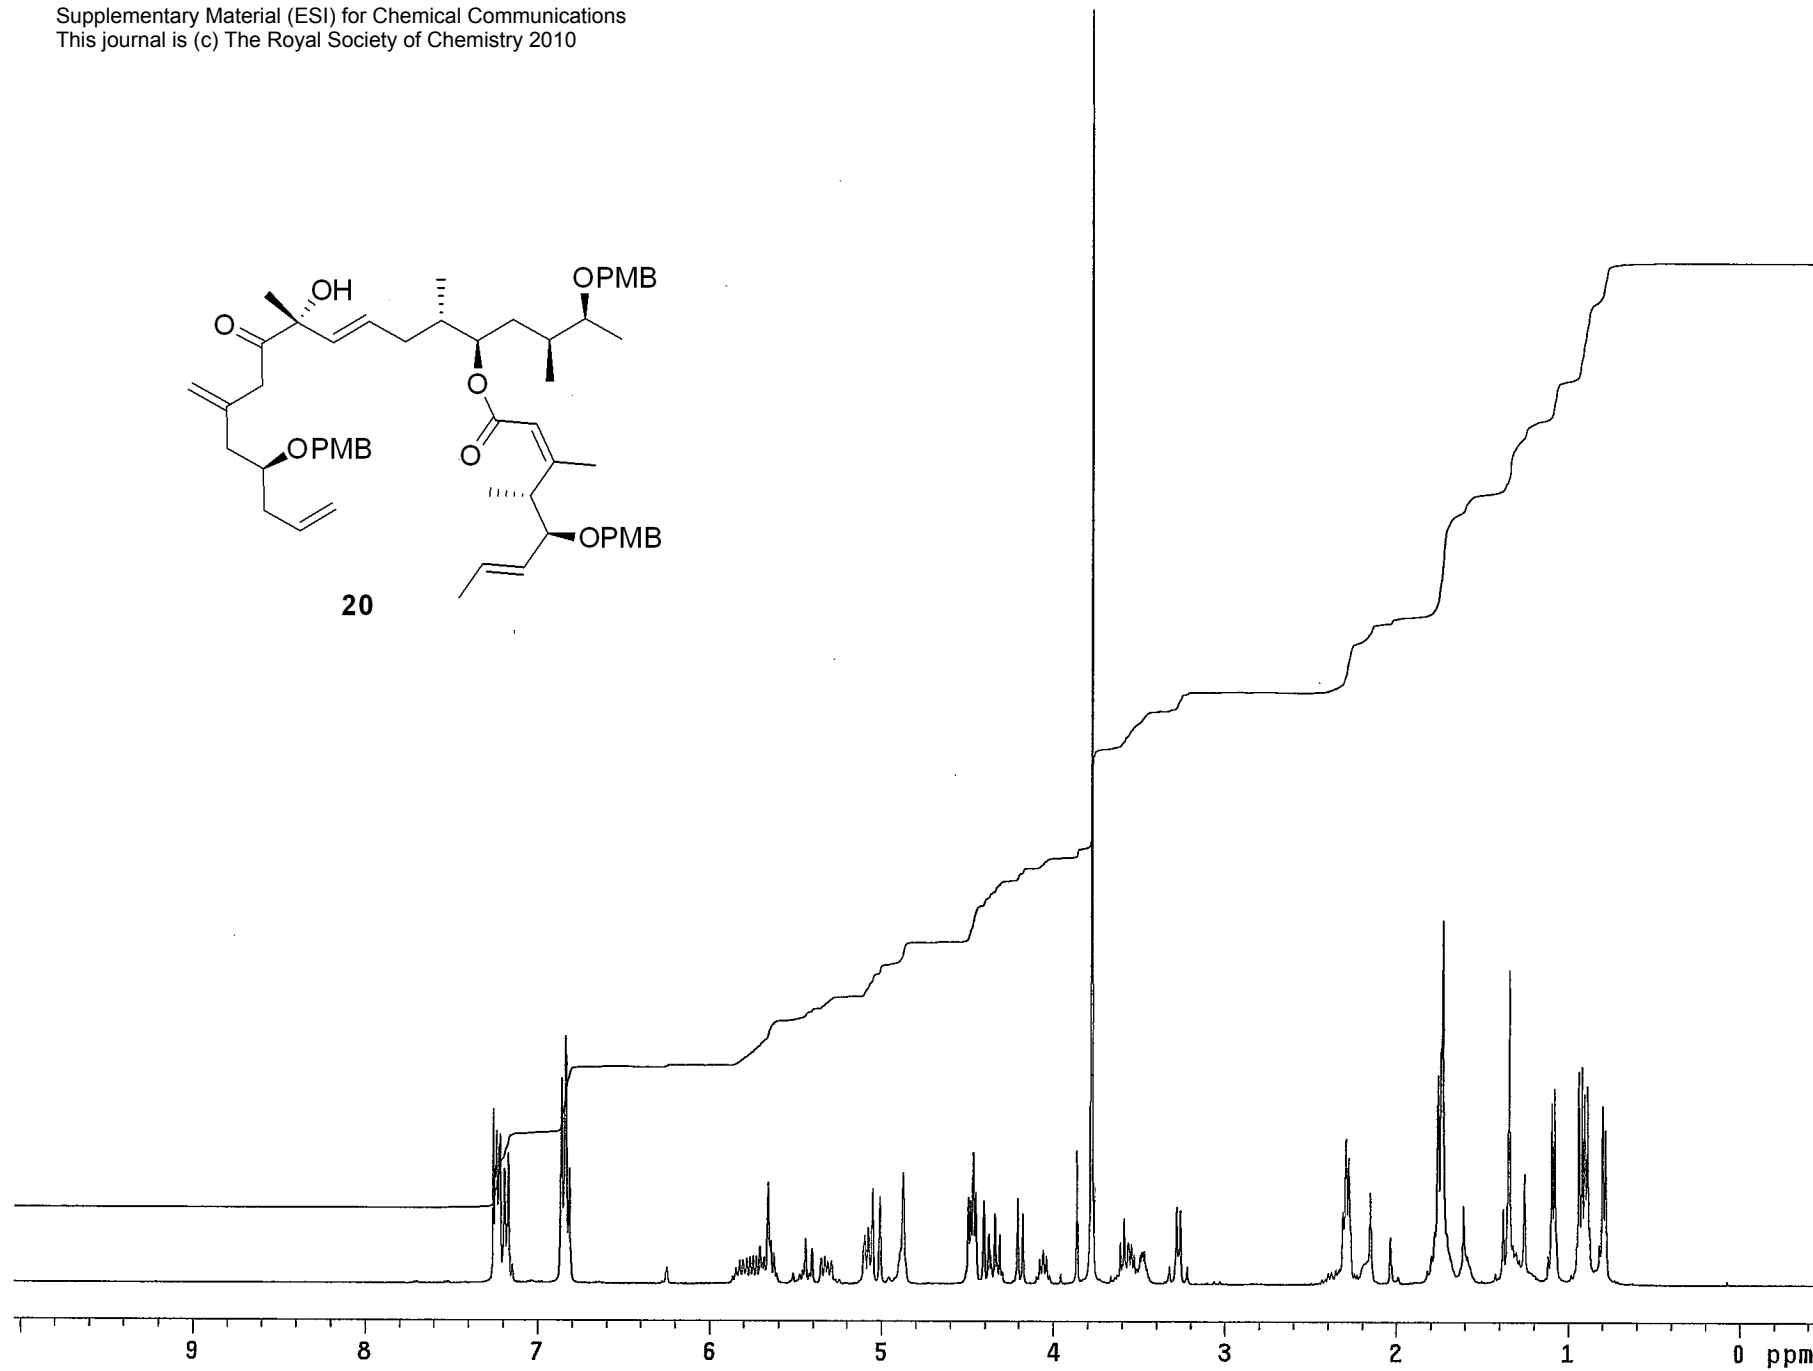

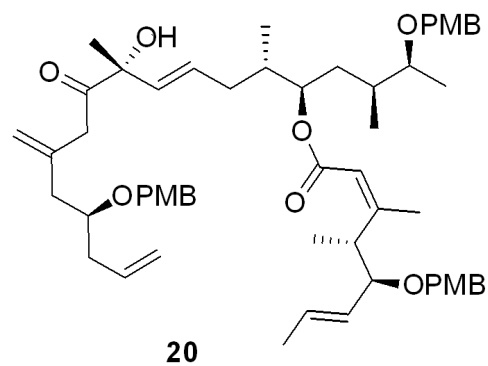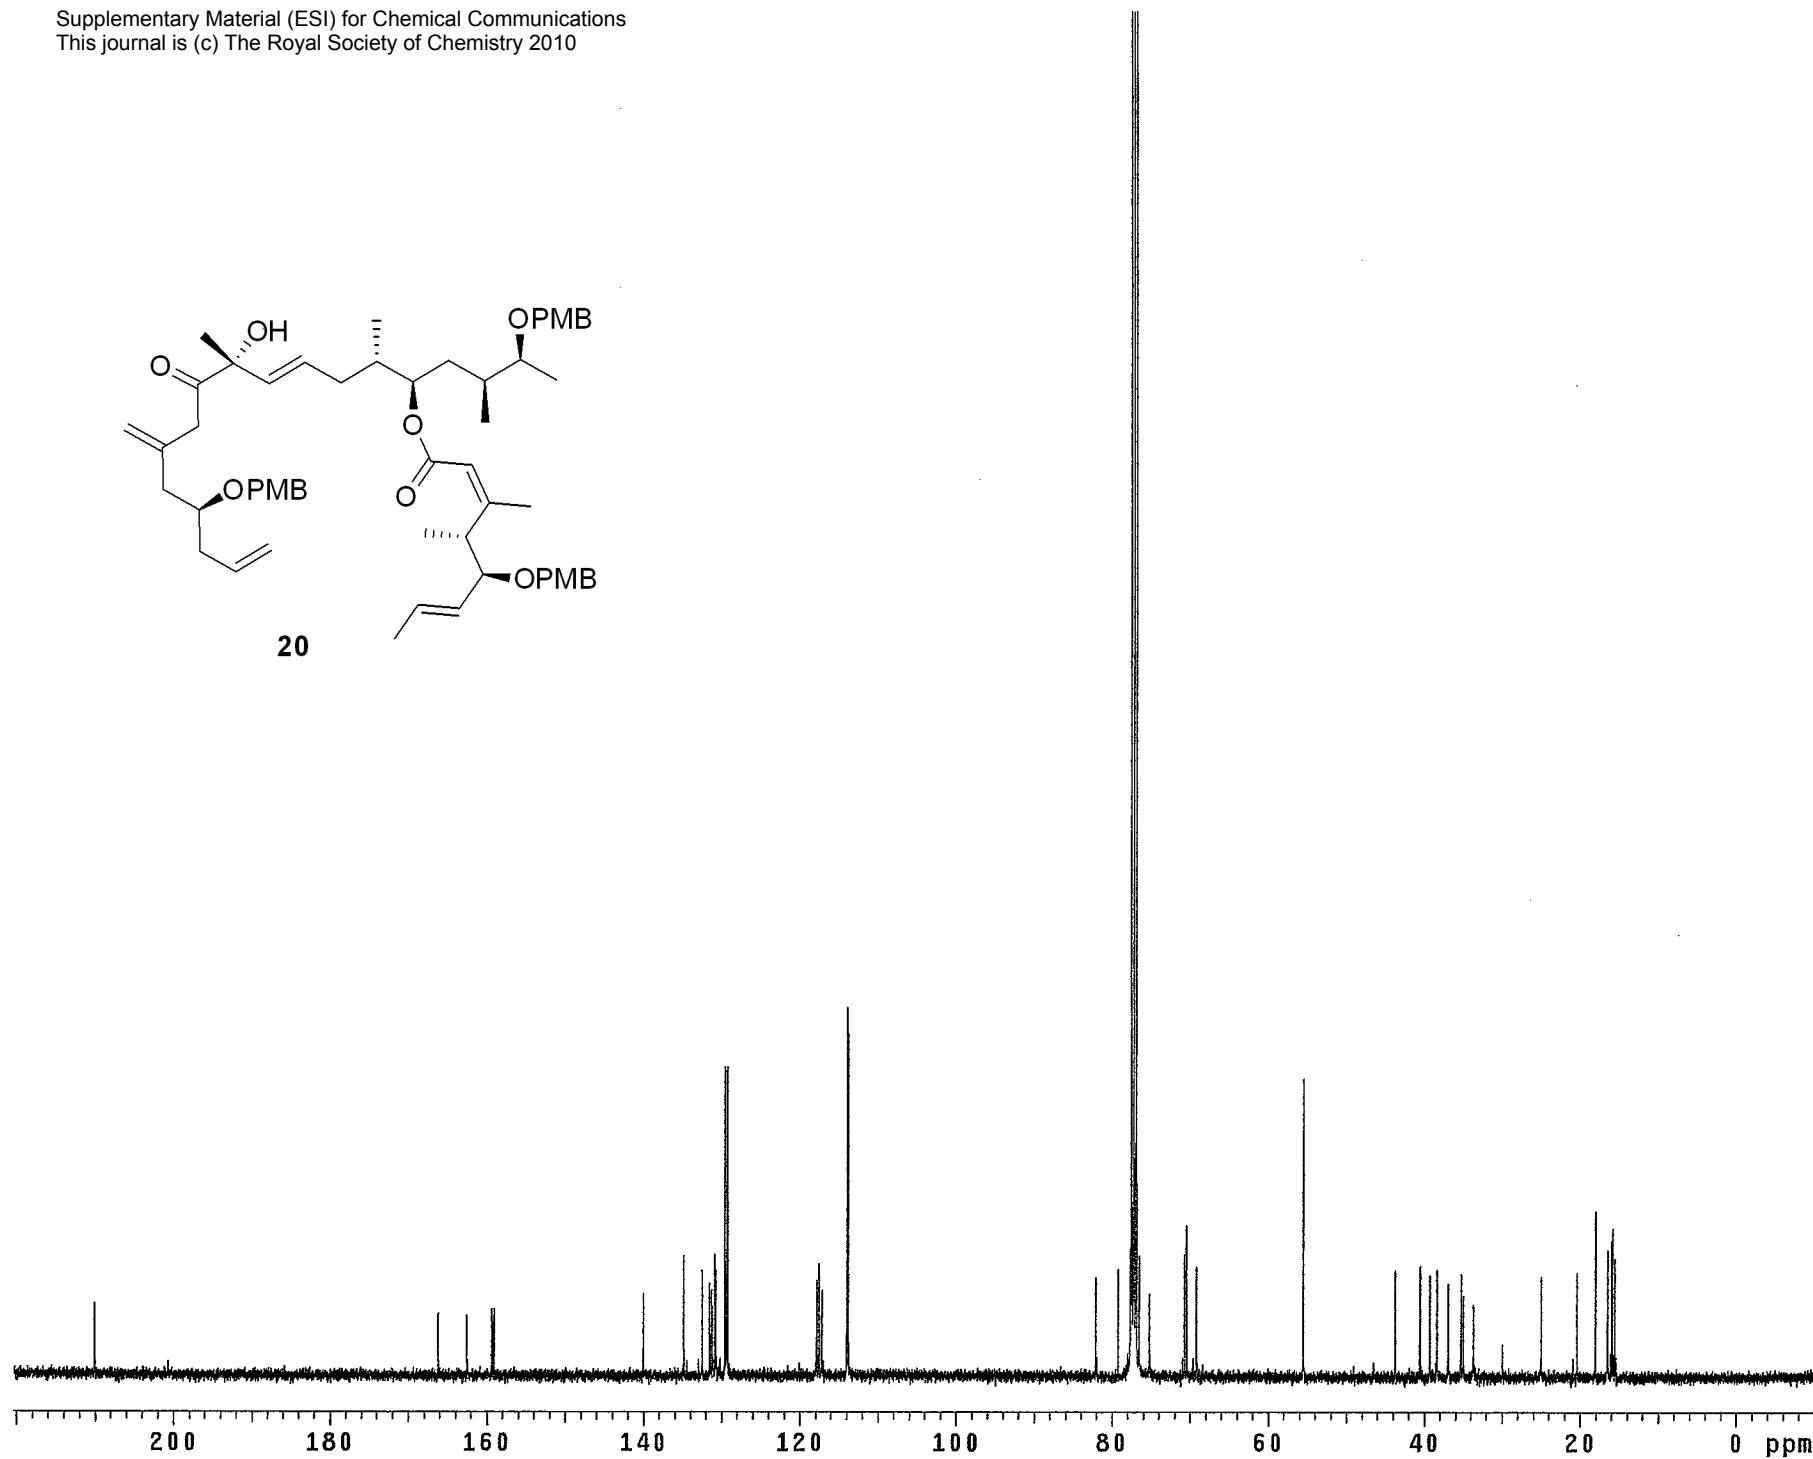

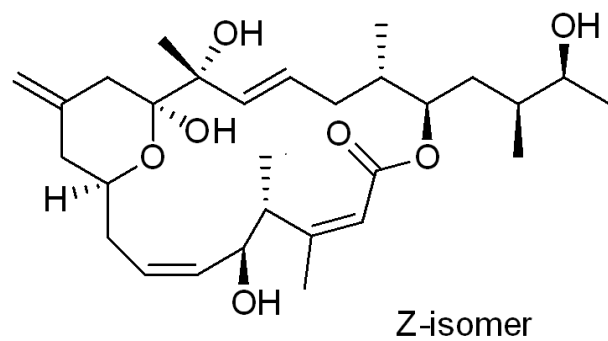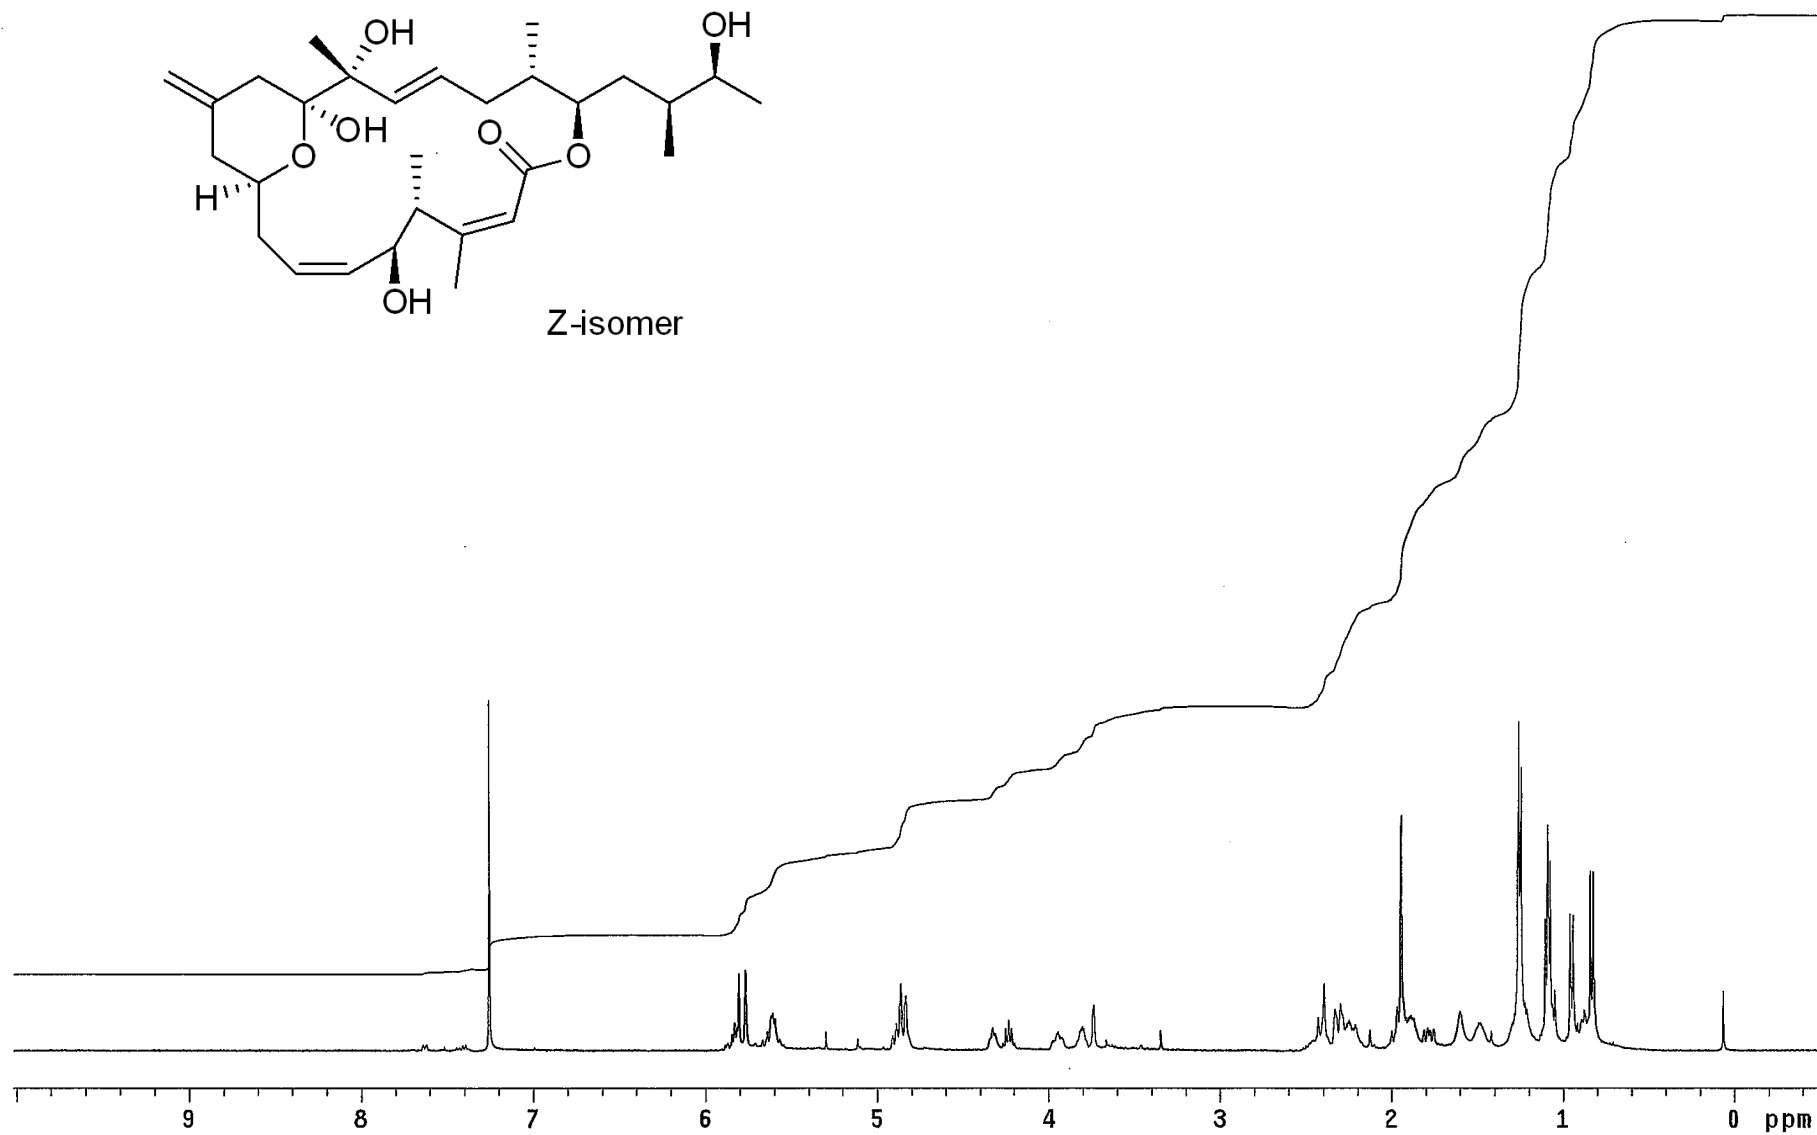

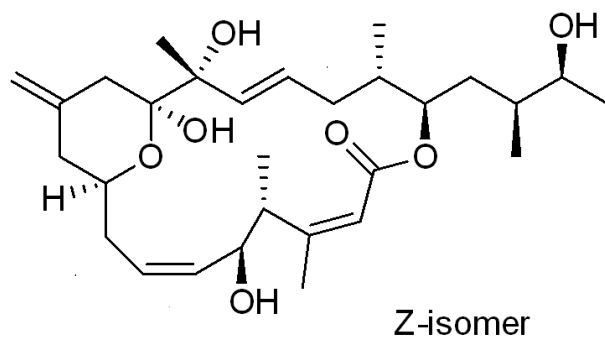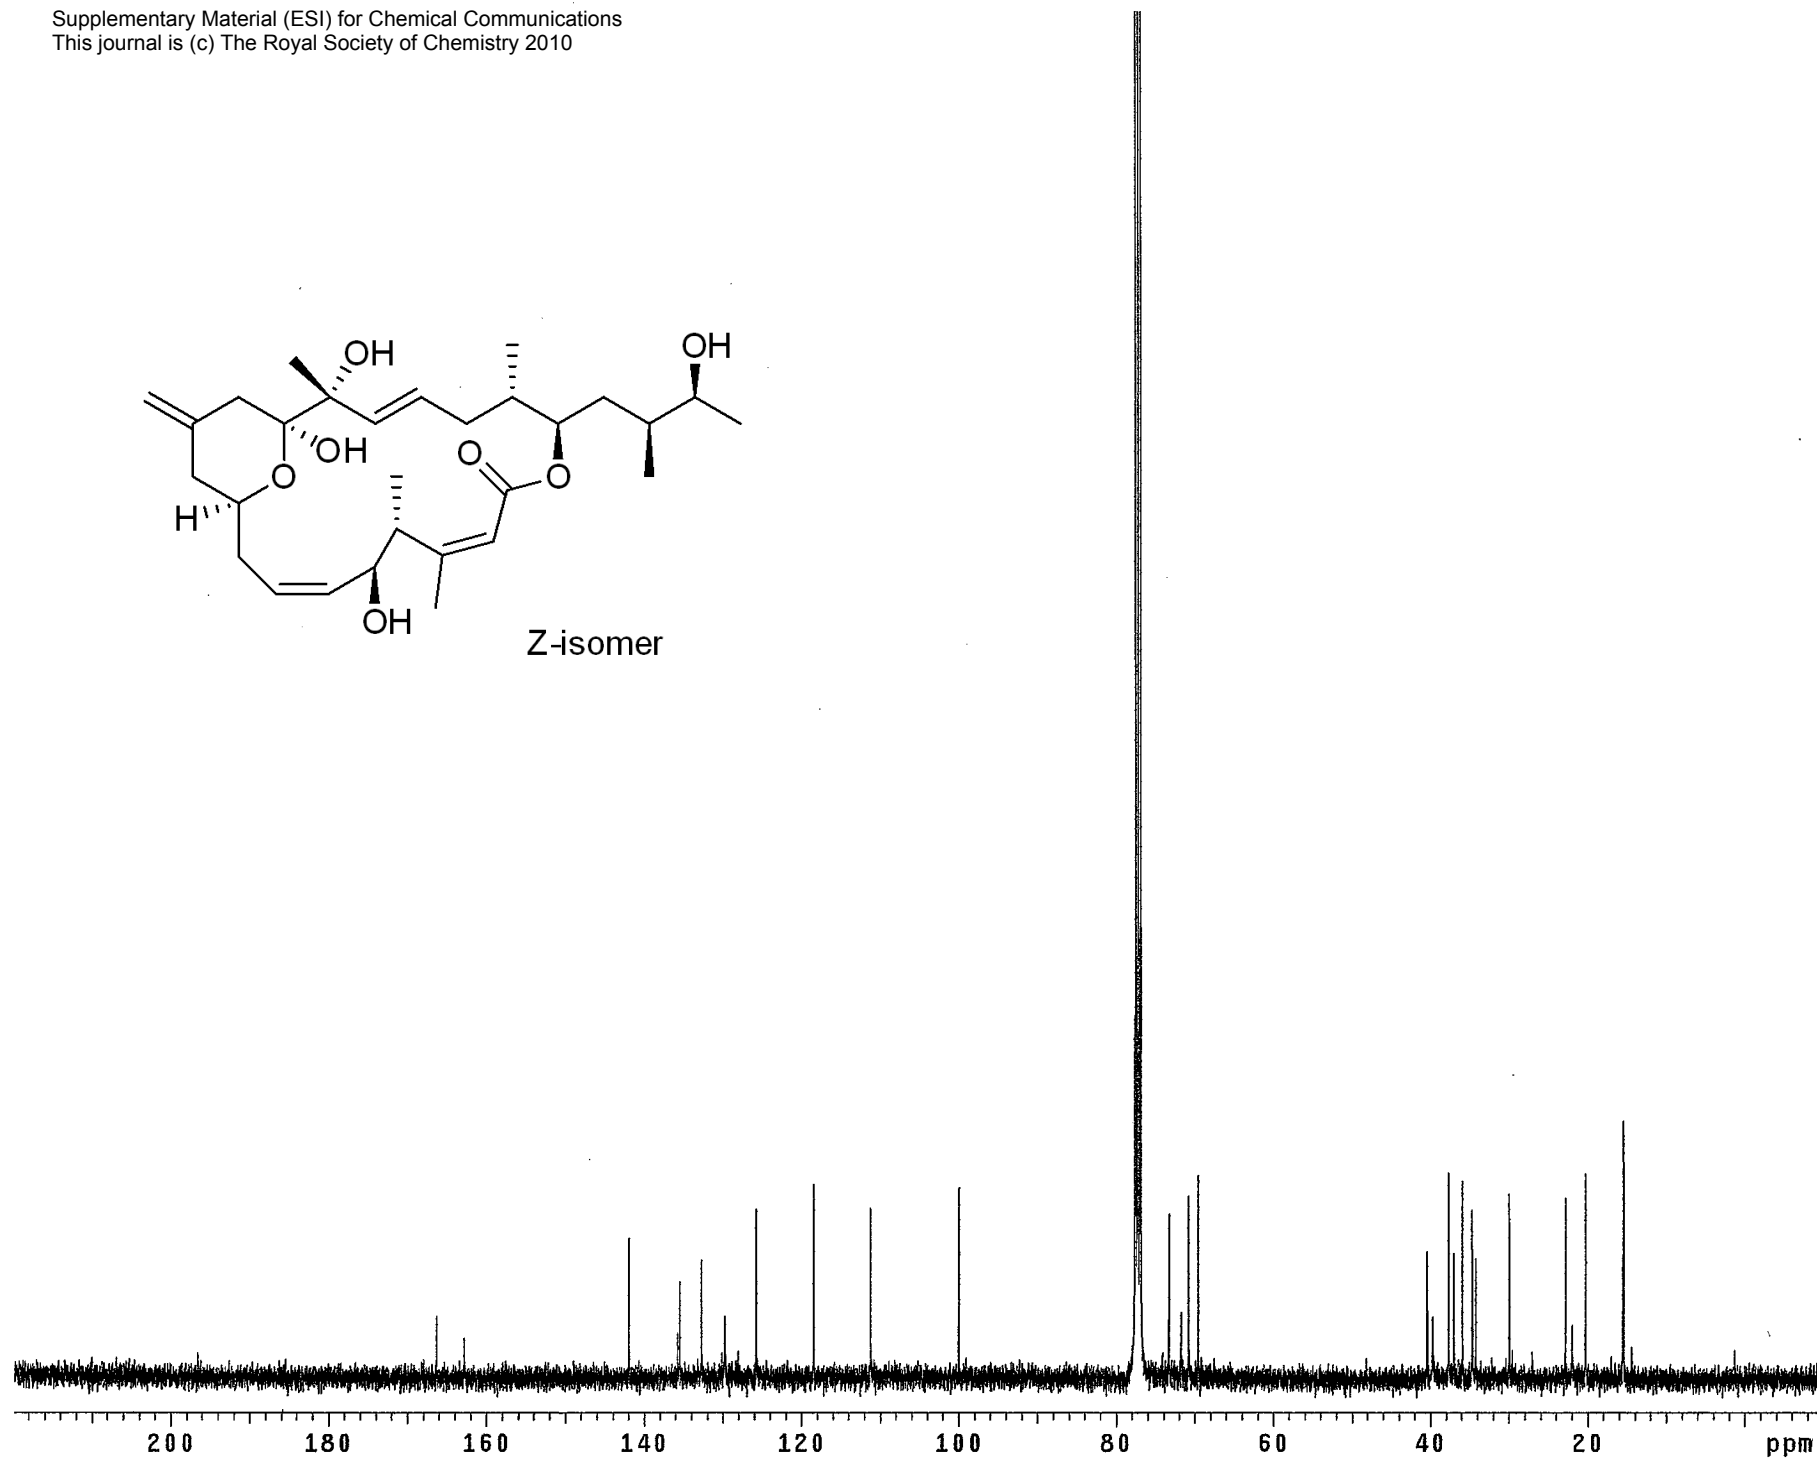



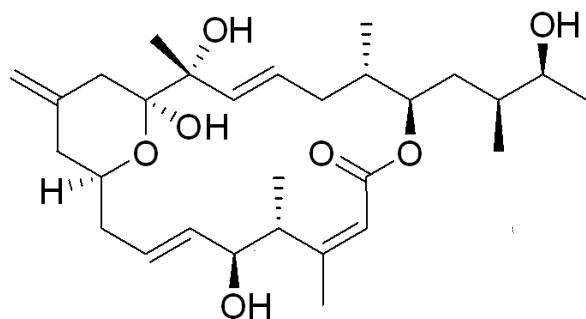

proposed structure of Iriomoteolide-1a

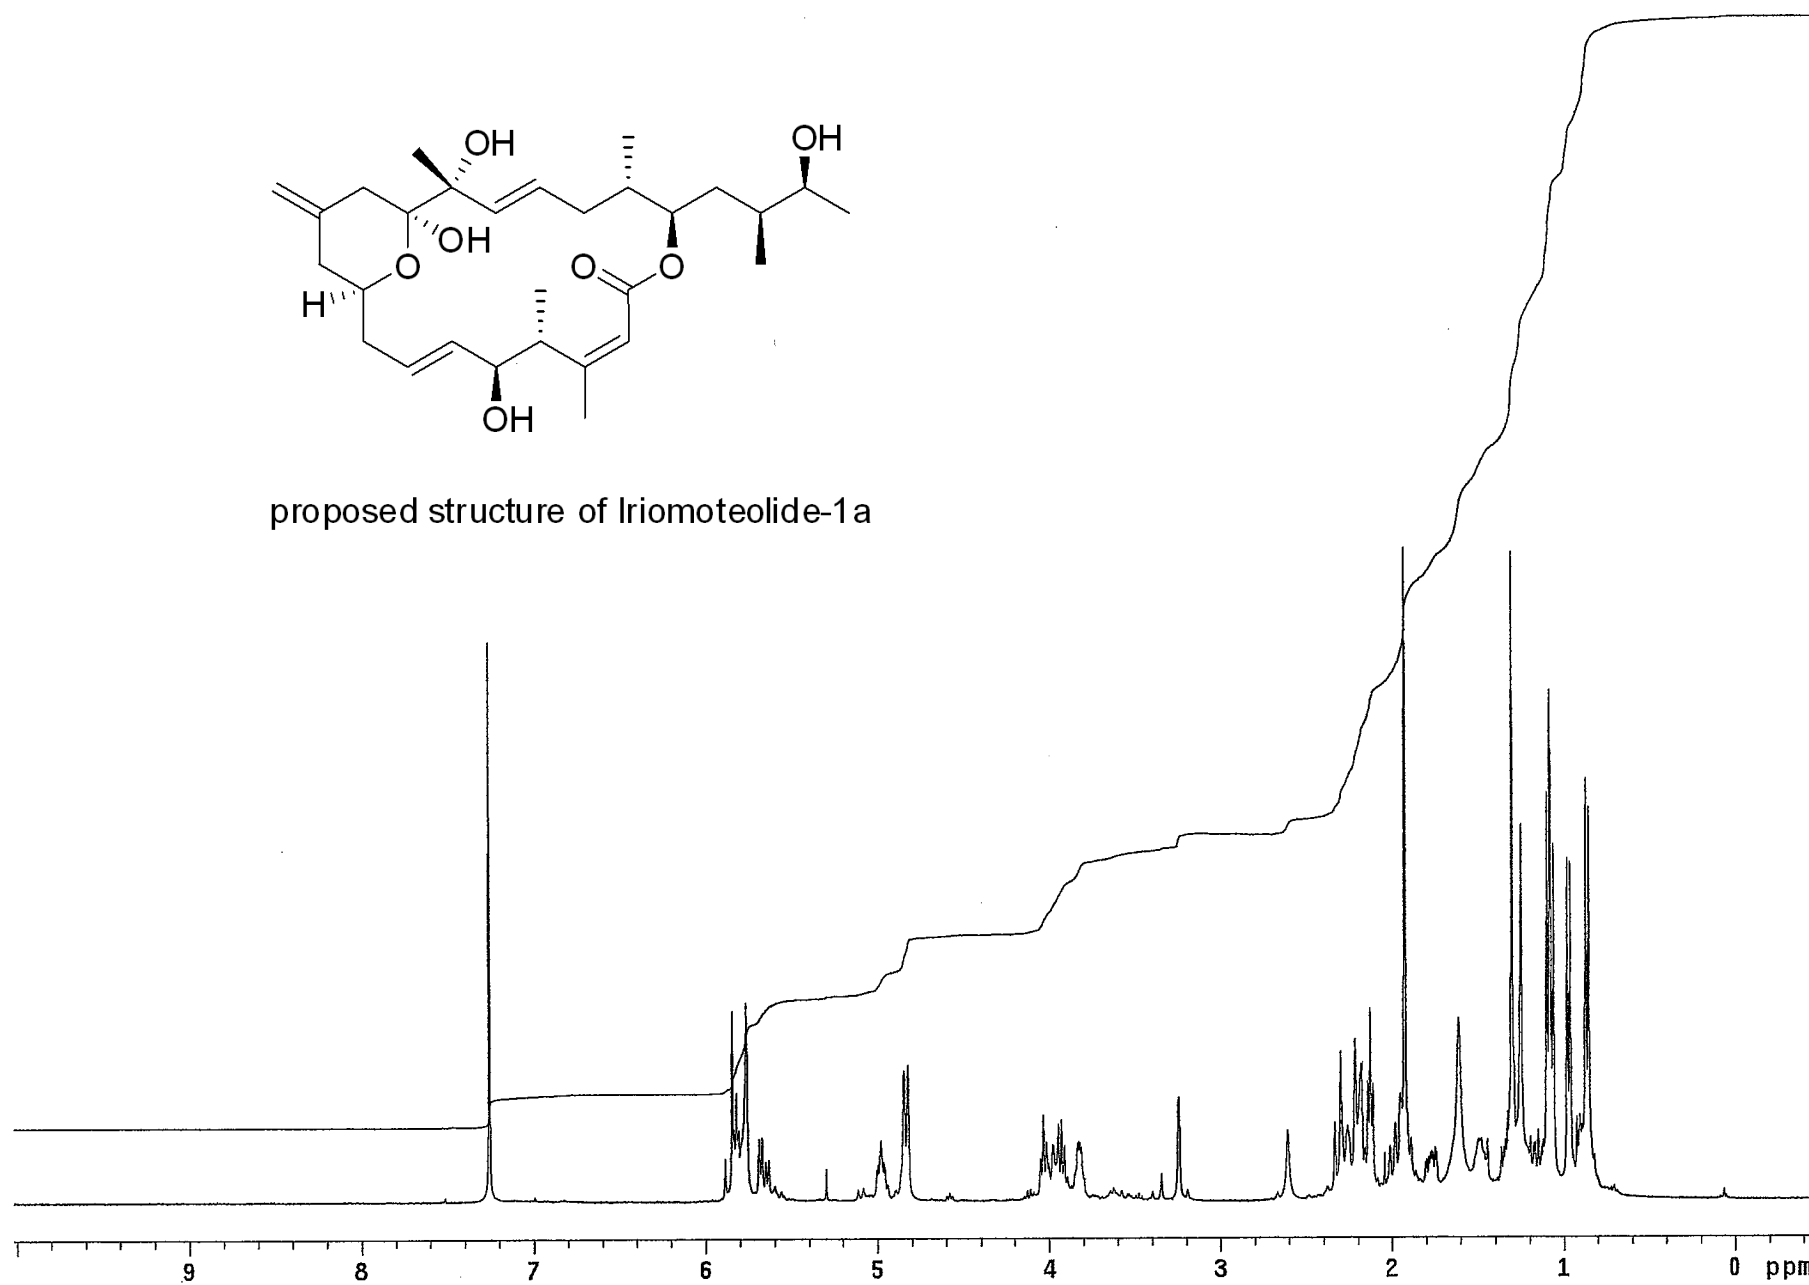

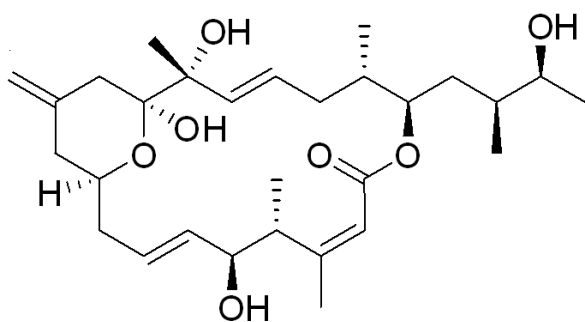

proposed structure of Iriomoteolide-1a

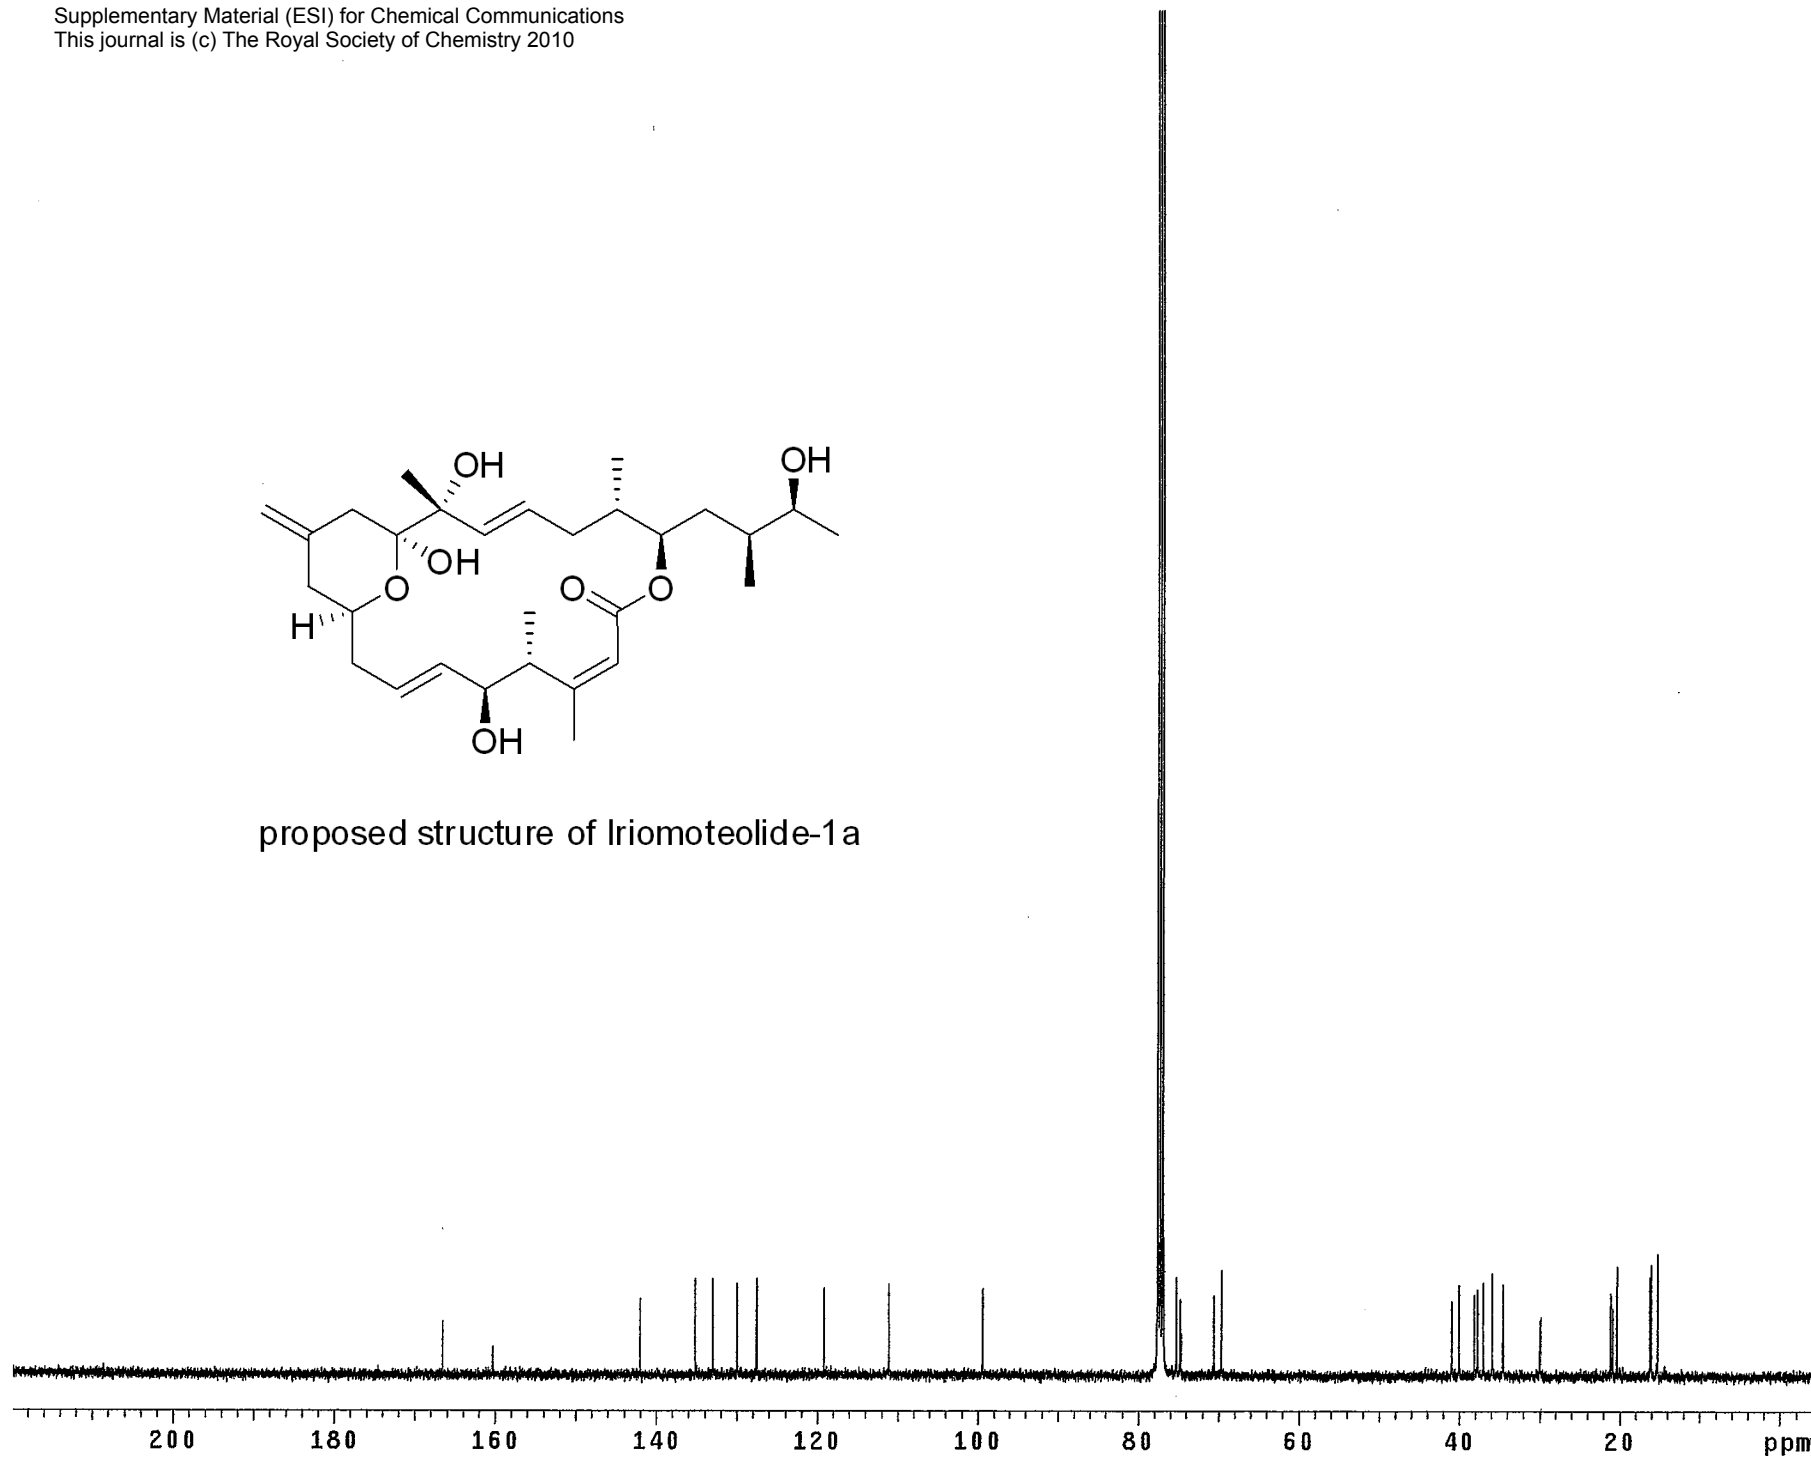

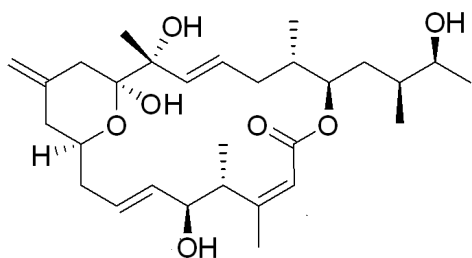

## COSY Spectrum

proposed structure of Iriomoteolide-1a

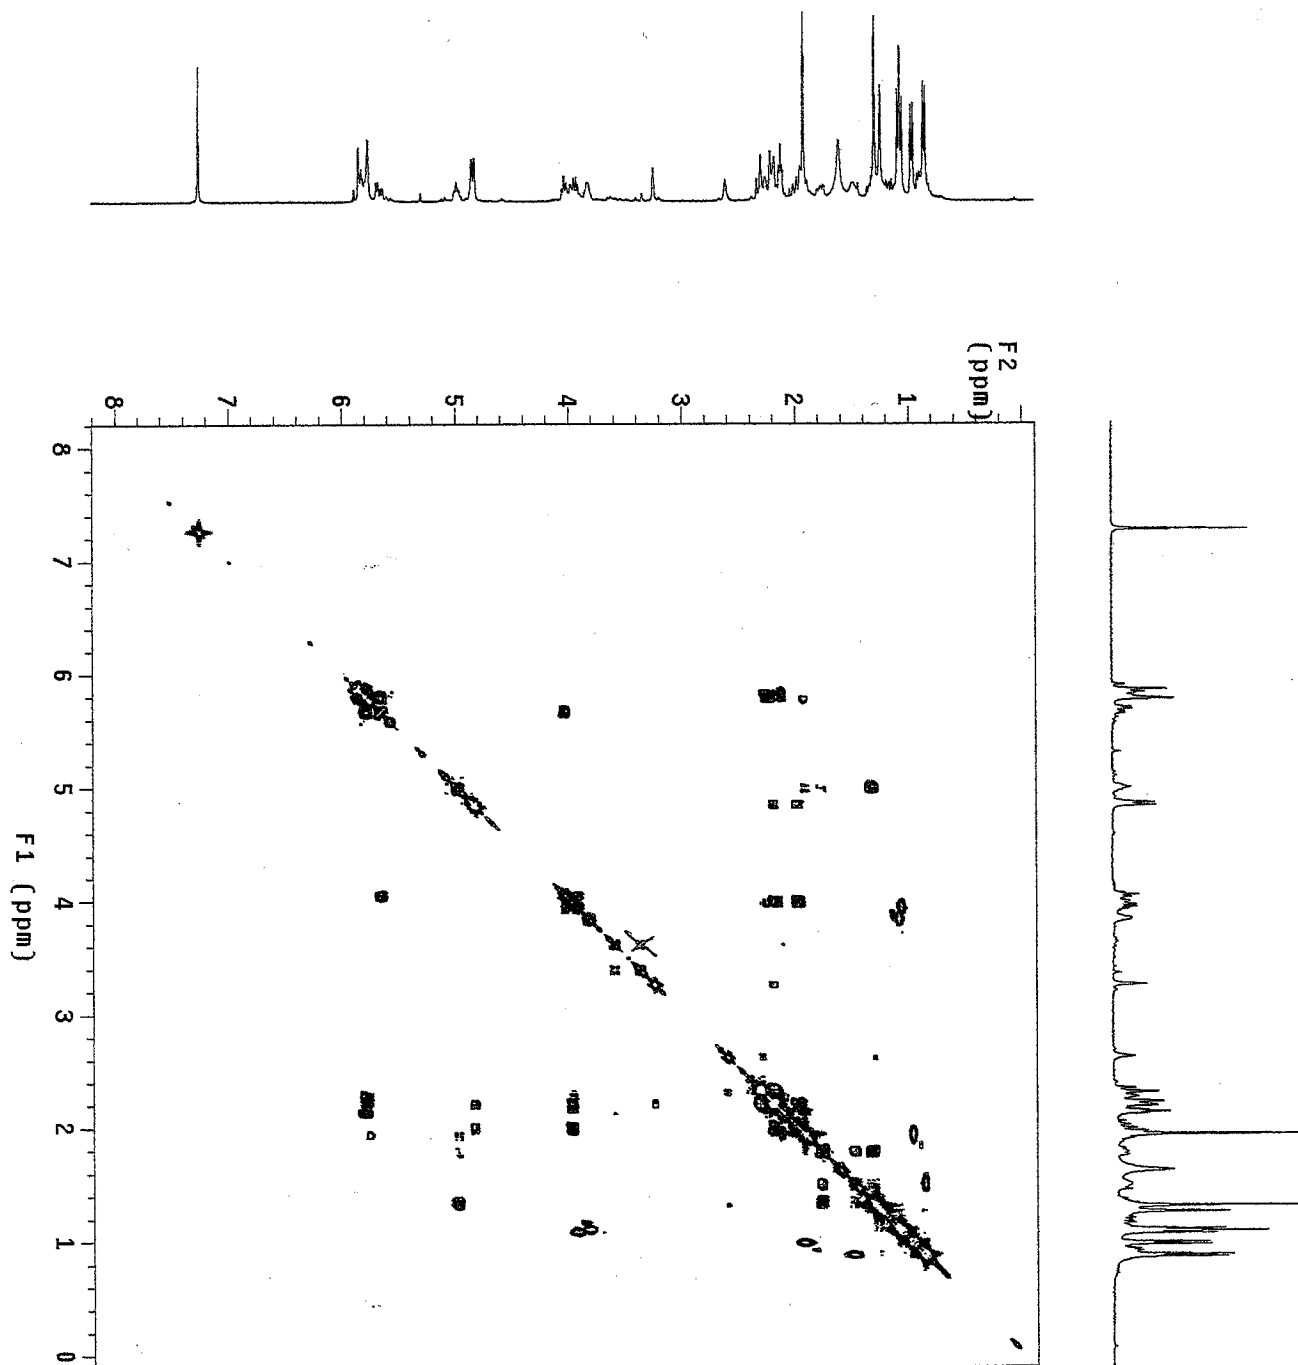

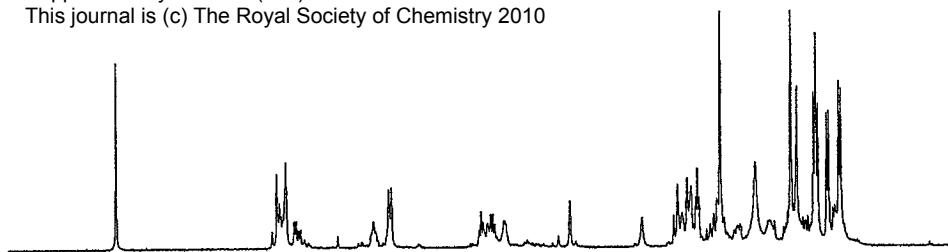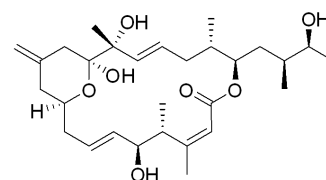

proposed structure of Iriomoteolide-1a

## HSQC Spectrum

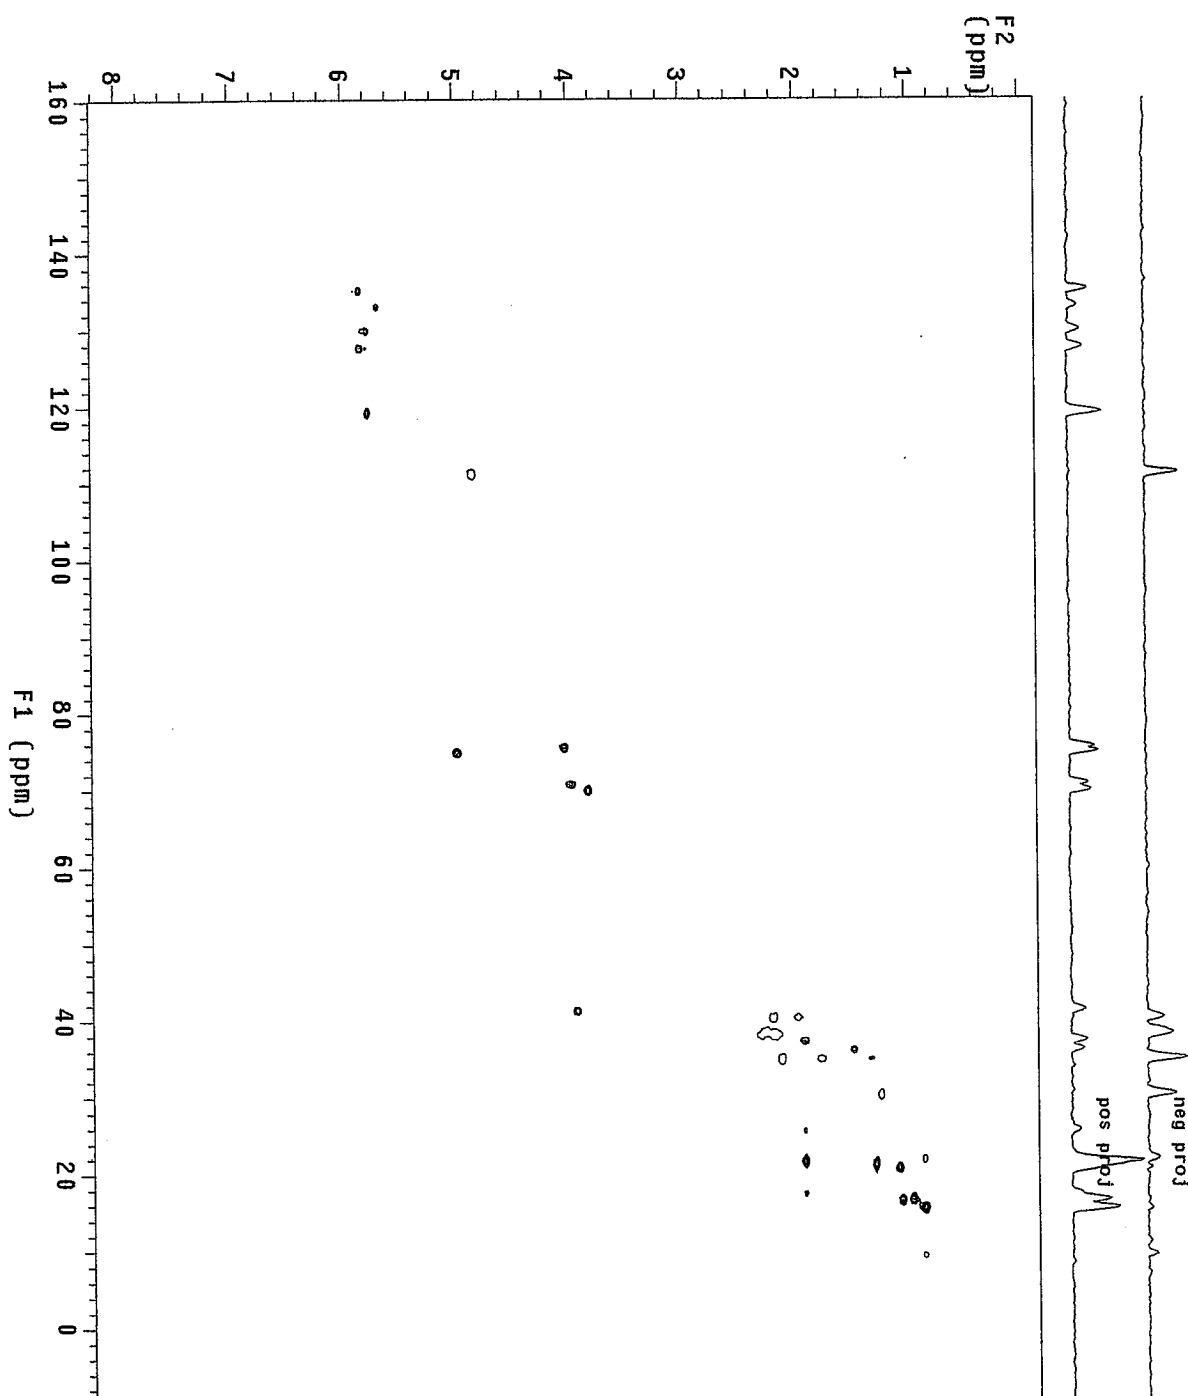

Figure S1.  $^1\text{H}$  NMR Spectrum of Iriomoteolide-1a (**1**) in  $\text{CDCl}_3$ .

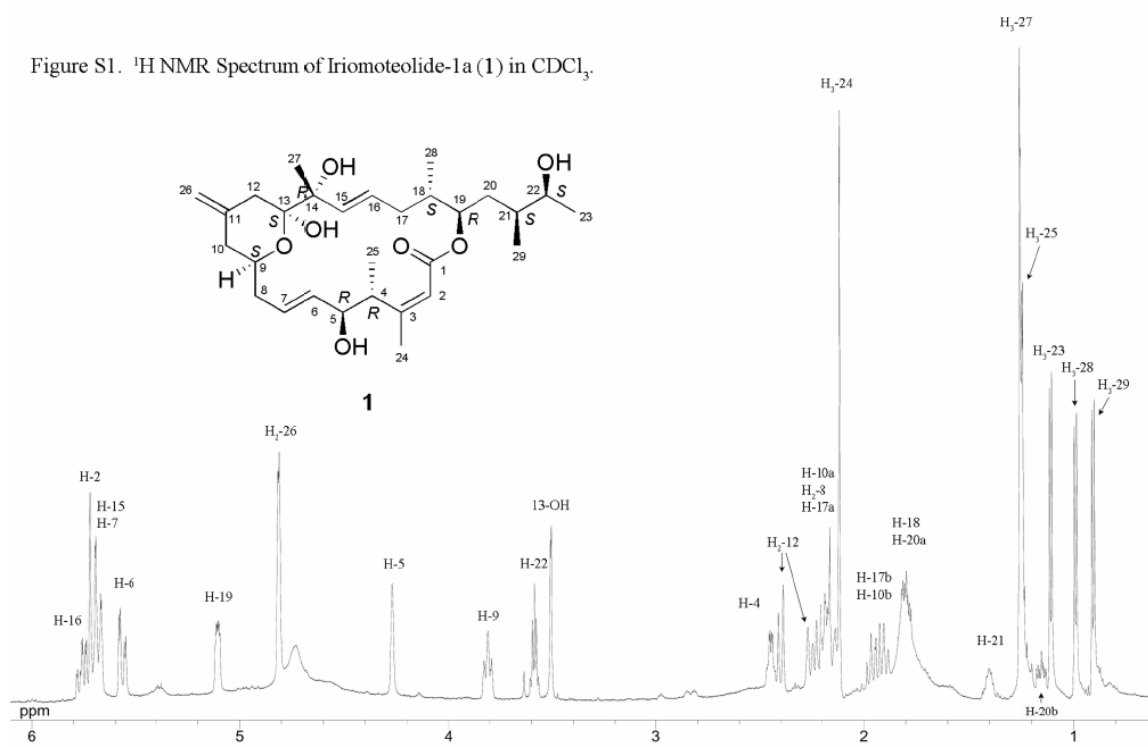

Natural

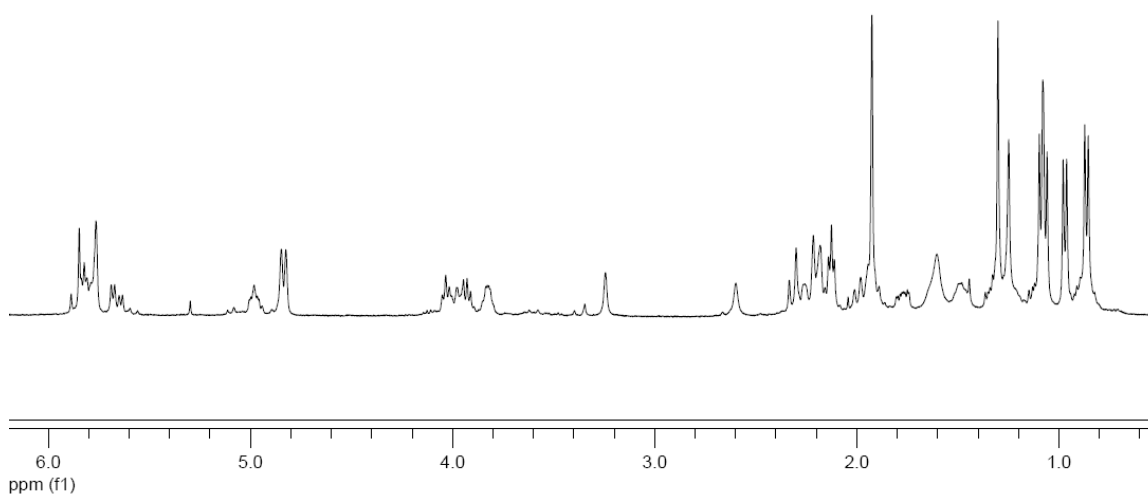

Synthetic

Figure-S3.  $^{13}\text{C}$  NMR Spectrum of Iriomoteolide-1a (**1**) in  $\text{CDCl}_3$ .

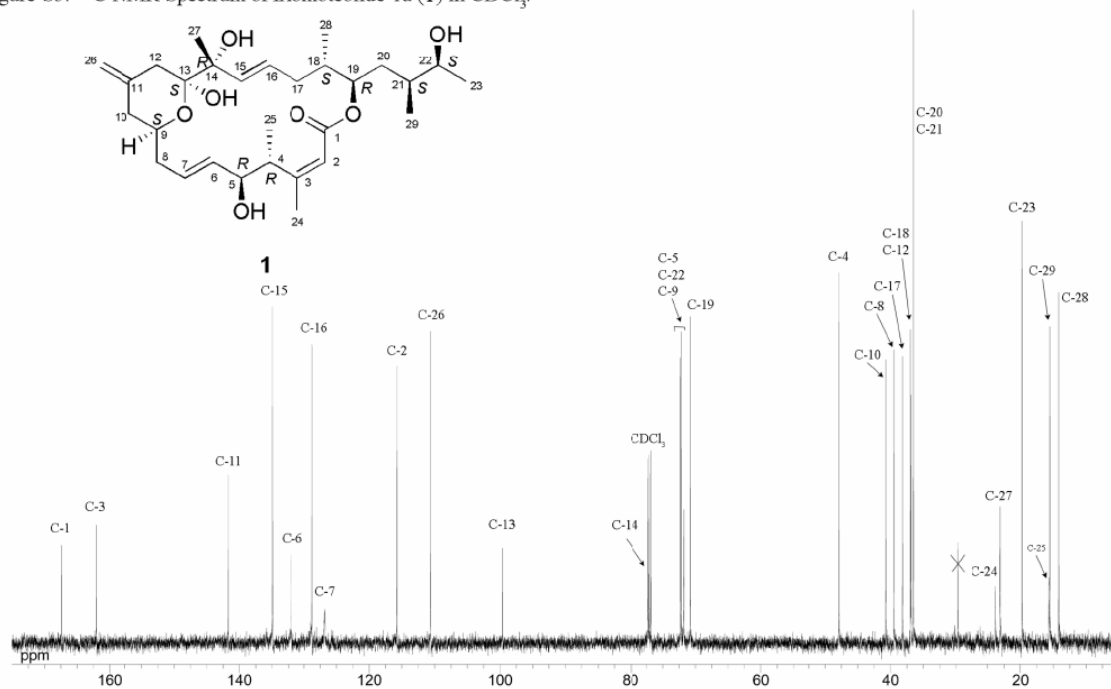

Natural

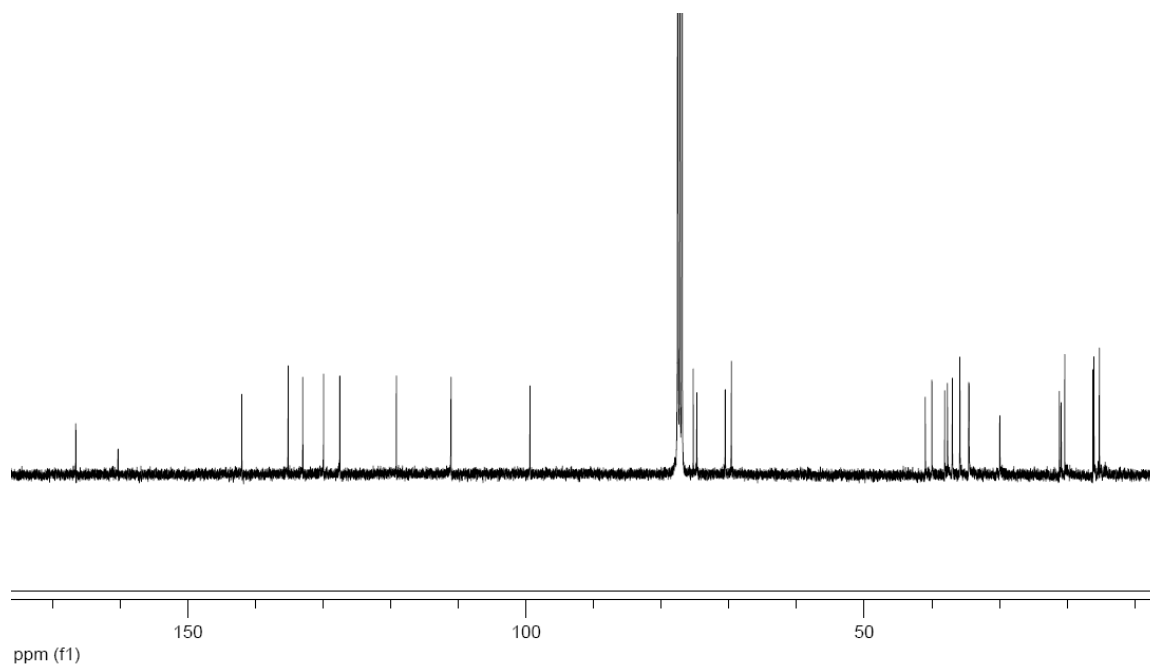

Synthetic

**TABLE 1.**  $^1\text{H}$  and  $^{13}\text{C}$  NMR ( $\text{CDCl}_3$ ) data for natural and synthetic iriomoteolide-1a (**1**)

| Position | $^1\text{H}$ Natural | $^1\text{H}$ Synthetic | $^{13}\text{C}$ Natural | $^{13}\text{C}$ Synthetic | $J_{\text{natural}}$                         | $J_{\text{synthetic}}$         |
|----------|----------------------|------------------------|-------------------------|---------------------------|----------------------------------------------|--------------------------------|
| 1        |                      |                        | 167.4                   | 166.6                     |                                              |                                |
| 2        | 5.72                 | 5.77                   | 115.8                   | 119.2                     | <i>brs</i>                                   | <i>s</i>                       |
| 3        |                      |                        | 162.0                   | 160.3                     |                                              |                                |
| 4        | 2.46                 | 3.92-3.96              | 47.9                    | 41.0                      | <i>dq</i> , 2.9, 7.3                         | <i>m</i>                       |
| 5        | 4.28                 | 4.02-4.06              | 72.3                    | 75.3                      | <i>m</i>                                     | <i>m</i>                       |
| 6        | 5.57                 | 5.67                   | 132.0                   | 133.0                     | <i>dd</i> , 4.1, 15.7                        | <i>dd</i> , 6.8, 15.5          |
| 7        | 5.68                 | 5.79-5.89              | 126.8                   | 127.5 <sup>a</sup>        | <i>m</i>                                     | <i>m</i>                       |
| 8a       | 2.18                 | 2.09-2.34              | 39.5                    | 38.1                      | <i>m</i>                                     | <i>m</i>                       |
| 8b       | 2.00                 |                        |                         |                           | <i>m</i>                                     |                                |
| 9        | 3.81                 | 3.97-4.01              | 71.8                    | 70.6                      | <i>brt</i> , 11.5                            | <i>m</i>                       |
| 10a      | 2.21                 |                        | 40.7                    | 40.0                      | <i>brd</i> , 12.7                            |                                |
| 10b      | 1.90                 |                        |                         |                           | <i>brt</i> , 12.3                            |                                |
| 11       |                      |                        | 141.7                   | 142.0                     |                                              |                                |
| 12a      | 2.40                 | 2.09-2.34              | 36.88                   | 37.7                      | <i>d</i> , 13.6                              | <i>m</i>                       |
| 12b      | 2.26                 |                        |                         |                           | <i>brd</i> , 13.6                            |                                |
| 13       | 3.52                 | 3.25                   | 99.7                    | 99.4                      | <i>brd</i> , 1.9                             | <i>s</i>                       |
| 14       |                      |                        | 77.2                    | 77.4                      |                                              |                                |
| 15       | 5.68                 | 5.79-5.89              | 134.9                   | 135.2                     | <i>brd</i> , 15.5<br><i>ddd</i> , 3.1, 10.8, | <i>m</i>                       |
| 16       | 5.76                 | 5.79-5.89              | 128.8                   | 129.9 <sup>a</sup>        | 15.5                                         | <i>m</i>                       |
| 17a      | 2.15                 | 2.09-2.15              | 38.2                    | 34.54                     | <i>m</i>                                     | <i>m</i>                       |
| 17b      | 1.96                 |                        |                         |                           | <i>dt</i> , 14.1, 11.6                       |                                |
| 18       | 1.82                 | 1.82-1.92              | 36.94                   | 37.0                      | <i>m</i>                                     | <i>m</i>                       |
| 19       | 5.11                 | 4.95-5.01              | 70.8                    | 74.7                      | <i>m</i>                                     | <i>m</i>                       |
| 20a      | 1.80                 | 1.78                   | 36.5                    | 34.50                     | <i>ddd</i> , 4.4, 8.7,<br>13.8               | <i>ddd</i> , 3.4,<br>7.8, 14.2 |
| 20b      | 1.15                 | 1.25-1.35              |                         |                           | <i>ddd</i> , 4.4, 8.8,<br>13.8               | <i>m</i>                       |
| 21       | 1.40                 | 1.42-1.53              | 36.5                    | 35.9                      | <i>m</i>                                     | <i>m</i>                       |
| 22       | 3.58                 | 3.80-3.86              | 72.2                    | 69.9                      | <i>quint</i> , 6.3                           | <i>m</i>                       |
| 23       | 1.11                 | 1.09                   | 19.8                    | 20.3                      | <i>d</i> , 6.3                               | <i>d</i> , 6.6                 |
| 24       | 2.12                 | 1.93                   | 23.8                    | 21.1                      | <i>s</i>                                     | <i>s</i>                       |
| 25       | 1.24                 | 1.07                   | 15.6                    | 16.0                      | <i>d</i> , 7.3                               | <i>d</i> , 7.8                 |
| 26a      | 4.82                 | 4.85                   | 110.6                   | 111.1                     | <i>brs</i>                                   | <i>s</i>                       |
| 26b      |                      | 4.83                   |                         |                           |                                              | <i>s</i>                       |
| 27       | 1.25                 | 1.31                   | 23.1                    | 20.9                      | <i>s</i>                                     | <i>s</i>                       |
| 28       | 0.99                 | 0.98                   | 14.2                    | 16.2                      | <i>d</i> , 6.8                               | <i>d</i> , 7.0                 |
| 29       | 0.91                 | 0.87                   | 15.5                    | 15.2                      | <i>d</i> , 6.7                               | <i>d</i> , 6.8                 |

<sup>a</sup> these two carbons may be interchangeable.

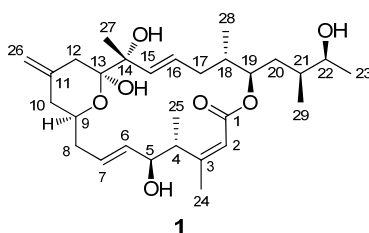

Supplement: c0cc00628a.pdf [file c0cc00628a.pdf]
